# Supplementary material for: Hygroscopicity of organic surrogate compounds from biomass burning and their effect on the efflorescence of ammonium sulfate in mixed aerosol particles
Source: Copernicus journal article supplement (doi:10.5194/acp-18-1045-2018), 2018-01-26
Supplement: Supplementary file 1 [file acp-18-1045-2018-supplement.zip]

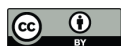

*Supplement of*

**Hygroscopicity of organic surrogate compounds from biomass burning and their effect on the efflorescence of ammonium sulfate in mixed aerosol particles**

**T. Lei et al.**

*Correspondence to:* Maofa Ge ([gemaofa@iccas.ac.cn](mailto:gemaofa@iccas.ac.cn))

- [acp-18-1045-2018-supplement-title-page.pdf](#)
- [results.xlsx](#)

The copyright of individual parts of the supplement might differ from the CC BY 4.0 License.
