# Supplementary material for: Hygroscopicity of organic surrogate compounds from biomass burning and their effect on the efflorescence of ammonium sulfate in mixed aerosol particles
Source: Copernicus journal article supplement (doi:10.5194/acp-18-1045-2018), 2018-01-26
Supplement: Supplementary file 1 [file results.xlsx]

## Sheet: Ammonium sulfate (100nm)
Ammonium sulfate dehumidification process						AIOMFAC in dehumidification mode		Ammonium sulfate humidification process				AIM in the humidification mode		AIOMFAC in the humidification mode
measured RH						99.9999	89.7057		AS			AIM		99.9999	89.7057
90	1.77	1.5	0.02	AIM	--	99.9989	40.1604	5	1.00503	1.5	0.02	5	1	99.9989	40.1604
85	1.61	1.5	0.02			99.9979	32.2984	10	1.00503	1.5	0.02	6.175	1	99.9979	32.2984
80	1.51	1.5	0.02	10	1	99.9969	28.3158	20	1.00202	1.5	0.02	7.35	1	99.9969	28.3158
75	1.43	1.5	0.02	10.899	1	99.9959	25.7578	30	1.00001	1.5	0.02	8.525	1	99.9959	25.7578
70	1.38	1.5	0.02	11.798	1	99.9949	23.9193	40	0.9958	1.5	0.02	9.7	1	99.9949	23.9193
65	1.32	1.5	0.02	12.697	1	99.9939	22.5072	50	0.99701	1.5	0.02	10.875	1	99.9939	22.5072
60	1.3	1.5	0.02	13.596	1	99.9929	21.3739	60	1.00603	1.5	0.02	12.05	1	99.9929	21.3739
55	1.26	1.5	0.02	14.495	1	99.9919	20.4353	65	0.99298	1.5	0.02	13.225	1	99.9919	20.4353
50	1.24	1.5	0.02	15.394	1	99.9909	19.6395	70	1.00202	1.5	0.02	14.4	1	99.9909	19.6395
45	1.2	1.5	0.02	16.293	1	99.9899	18.9523	75	0.99459	1.5	0.02	15.575	1	99.9899	18.9523
39	1.17	1.5	0.02	17.192	1	99.9849	16.5133	80	1.45732	1.5	0.02	16.75	1	99.9849	16.5133
34	1.14	1.5	0.02	18.091	1	99.9799	14.9661	85	1.57508	1.5	0.02	17.925	1	99.9799	14.9661
32	1	1.5	0.02	18.99	1	99.9749	13.8616	90	1.71669	1.5	0.02	19.1	1	99.9749	13.8616
30	1	1.5	0.02	19.889	1	99.9699	13.017					20.275	1	99.9699	13.017
25	1	1.5	0.02	20.788	1	99.9649	12.3413					21.45	1	99.9649	12.3413
20	1	1.5	0.02	21.687	1	99.9599	11.7829					22.625	1	99.9599	11.7829
15	1	1.5	0.02	22.586	1	99.9549	11.3104					23.8	1	99.9549	11.3104
10	1	1.5	0.02	23.485	1	99.9499	10.903					24.975	1	99.9499	10.903
				24.384	1	99.9449	10.5464					26.15	1	99.9449	10.5464
				25.283	1	99.9399	10.2306					27.325	1	99.9399	10.2306
				26.182	1	99.9349	9.94806					28.5	1	99.9349	9.94806
				27.081	1	99.9299	9.69305					29.675	1	99.9299	9.69305
				27.98	1	99.9249	9.46123					30.85	1	99.9249	9.46123
				28.879	1	99.9199	9.24915					32.025	1	99.9199	9.24915
				29.778	1	99.9149	9.05404					33.2	1	99.9149	9.05404
				30.677	1	99.9099	8.87367					34.375	1	99.9099	8.87367
				31.576	1	99.9049	8.70619					35.55	1	99.9049	8.70619
				32.475	1	99.8999	8.55009					36.725	1	99.8999	8.55009
				33.374	1	99.8899	8.26705					37.9	1	99.8899	8.26705
				34.273	1	99.8799	8.01643					39.075	1	99.8799	8.01643
				35.172	1.17539	99.8699	7.79228					40.25	1	99.8699	7.79228
				36.071	1.17921	99.8599	7.59006					41.425	1	99.8599	7.59006
				36.97	1.18304	99.8499	7.40628					42.6	1	99.8499	7.40628
				37.869	1.18689	99.8399	7.23821					43.775	1	99.8399	7.23821
				38.768	1.19075	99.8299	7.08363					44.95	1	99.8299	7.08363
				39.667	1.19464	99.8199	6.94078					46.125	1	99.8199	6.94078
				40.566	1.19855	99.8099	6.80817					47.3	1	99.8099	6.80817
				41.465	1.20249	99.7999	6.68459					48.475	1	99.7999	6.68459
				42.364	1.20646	99.7799	6.46063					49.65	1	99.7799	6.46063
				43.263	1.21046	99.7599	6.26241					50.825	1	99.7599	6.26241
				44.162	1.21451	99.7399	6.08521					52	1	99.7399	6.08521
				45.061	1.2186	99.7199	5.92542					53.175	1	99.7199	5.92542
				45.96	1.22273	99.6999	5.78026					54.35	1	99.6999	5.78026
				46.859	1.22691	99.6799	5.64756					55.525	1	99.6799	5.64756
				47.758	1.23114	99.6599	5.52556					56.7	1	99.6599	5.52556
				48.657	1.23544	99.6399	5.41285					57.875	1	99.6399	5.41285
				49.556	1.23979	99.6199	5.30827					59.05	1	99.6199	5.30827
				50.455	1.24421	99.5999	5.21085					60.225	1	99.5999	5.21085
				51.354	1.2487	99.5799	5.11978					61.4	1	99.5799	5.11978
				52.253	1.25326	99.5599	5.03438					62.575	1	99.5599	5.03438
				53.152	1.2579	99.5399	4.95406					63.75	1	99.5399	4.95406
				54.051	1.26263	99.5199	4.87831					64.925	1	99.5199	4.87831
				54.949	1.26745	99.4999	4.80671					67.275	1	99.4999	4.80671
				55.848	1.27237	99.3999	4.49918					68.45	1	99.3999	4.49918
				56.747	1.27738	99.2999	4.25423					69.625	1	99.2999	4.25423
				57.646	1.28251	99.1999	4.05271					70.8	1	99.1999	4.05271
				58.545	1.28776	99.0999	3.88289					71.975	1	99.0999	3.88289
				59.444	1.29313	99	3.73724					73.15	1	99	3.73724
				60.343	1.29863	98.75	3.44686					74.325	1	98.75	3.44686
				61.242	1.30428	98.5	3.22759					75.5	1	98.5	3.22759
				62.141	1.31007	98.25	3.0544					76.675	1	98.25	3.0544
				63.04	1.31603	98	2.91322					77.85	1	98	2.91322
				63.939	1.32216	97.5	2.6952					79.025	1	97.5	2.6952
				64.838	1.32848	97	2.53328					80.2	1.48679	97	2.53328
				65.737	1.335	96.5	2.40738					81.375	1.50602	96.5	2.40738
				66.636	1.34173	96	2.30619					82.55	1.52718	96	2.30619
				67.535	1.34869	95.5	2.22273					83.725	1.55062	95.5	2.22273
				68.434	1.3559	95	2.15249					84.9	1.57685	95	2.15249
				69.333	1.36338	94.5	2.09237					86.075	1.60648	94.5	2.09237
				70.232	1.37114	94	2.04018					87.25	1.64033	94	2.04018
				71.131	1.37923	93.5	1.99434					88.425	1.67955	93.5	1.99434
				72.03	1.38766	93	1.95366					89.6	1.72571	93	1.95366
				72.929	1.39645	92.5	1.91724					90.775	1.78112	92.5	1.91724
				73.828	1.40566	92	1.88437					91.95	1.84922	92	1.88437
				74.727	1.41531	91.5	1.85452					93.125	1.93539	91.5	1.85452
				75.626	1.42546	91	1.82722					94.3	2.04862	91	1.82722
				76.525	1.43614	90.5	1.80215					95.475	2.20517	90.5	1.80215
				77.424	1.44743	90	1.77899					96.65	2.43852	90	1.77899
				78.323	1.45938	89.5	1.7575					97.825	2.83455	89.5	1.7575
				79.222	1.47207	89	1.7375					99	3.74471	89	1.7375
				80.121	1.4856	88.5	1.7188							88.5	1.7188
				81.02	1.50007	88	1.70127							88	1.70127
				81.919	1.5156	87.5	1.68478							87.5	1.68478
				82.818	1.53235	87	1.66923							87	1.66923
				83.717	1.5505	86.5	1.65452							86.5	1.65452
				84.616	1.57027	86	1.64058							86	1.64058
				85.515	1.59193	85.5	1.62734							85.5	1.62734
				86.414	1.61582	85	1.61474							85	1.61474
				87.313	1.64233	84.5	1.60272							84.5	1.60272
				88.212	1.67202	84	1.59123							84	1.59123
				89.111	1.70558	83.5	1.58024							83.5	1.58024
				90.01	1.7439	83	1.56971							83	1.56971
				90.909	1.78822	82.5	1.5596							82.5	1.5596
				91.808	1.84022	82	1.54988							82	1.54988
				92.707	1.90226	81.5	1.54053							81.5	1.54053
				93.606	1.97783	81	1.53151							81	1.53151
				94.505	2.07224	80.5	1.52282							80.5	1.52282
				95.404	2.19406	80	1.51442							80	1.51442
				96.303	2.35835	79.5	1.50629							79.5	1.50629
				97.202	2.59478	79	1.49843							79.5	1
				98.101	2.9745	78.5	1.49082							79	1
				99	3.7448	78	1.48344							78.5	1
						77.5	1.47627							78	1
						77	1.46931							77.5	1
						76.5	1.46254							77	1
						76	1.45596							76.5	1
						75.5	1.44955							76	1
						75	1.44331							75.5	1
						74.5	1.43723							75	1
						74	1.43129							74.5	1
						73.5	1.4255							74	1
						73	1.41984							73.5	1
						72.5	1.41431							73	1
						72	1.40891							72.5	1
						71.5	1.40362							72	1
						71	1.39844							71.5	1
						70.5	1.39338							71	1
						70	1.38841							70.5	1
						69.5	1.38354							70	1
						69	1.37877							69.5	1
						68.5	1.37409							69	1
						68	1.36949							68.5	1
						67.5	1.36498							68	1
						67	1.36054							67.5	1
						66.5	1.35619							67	1
						66	1.3519							66.5	1
						65.5	1.34769							66	1
						65	1.34355							65.5	1
						64.5	1.33947							65	1
						64	1.33545							64.5	1
						63.5	1.33149							64	1
						63	1.3276							63.5	1
						62.5	1.32376							63	1
						62	1.31997							62.5	1
						61.5	1.31624							62	1
						61	1.31256							61.5	1
						60.5	1.30892							61	1
						60	1.30534							60.5	1
						59.5	1.3018							60	1
						59	1.2983							59.5	1
						58.5	1.29484							59	1
						58	1.29143							58.5	1
						57.5	1.28805							58	1
						57	1.28472							57.5	1
						56.5	1.28142							57	1
						56	1.27815							56.5	1
						55.5	1.27492							56	1
						55	1.27173							55.5	1
						54.5	1.26856							55	1
						54	1.26543							54.5	1
						53.5	1.26232							54	1
						53	1.25925							53.5	1
						52.5	1.2562							53	1
						52	1.25318							52.5	1
						51.5	1.25018							52	1
						51	1.24721							51.5	1
						50.5	1.24427							51	1
						50	1.24134							50.5	1
						49.5	1.23844							50	1
						49	1.23556							49.5	1
						48.5	1.2327							49	1
						48	1.22986							48.5	1
						47.5	1.22704							48	1
						47	1.22424							47.5	1
						46.5	1.22146							47	1
						46	1.21869							46.5	1
						45.5	1.21594							46	1
						45	1.21321							45.5	1
						44.5	1.21048							45	1
						44	1.20778							44.5	1
						43.5	1.20509							44	1
						43	1.20241							43.5	1
						42.5	1.19974							43	1
						42	1.19709							42.5	1
						41.5	1.19445							42	1
						41	1.19181							41.5	1
						40.5	1.18919							41	1
						40	1.18658							40.5	1
						39.5	1.18398							40	1
						39	1.18139							39.5	1
						38.5	1.17881							39	1
						38	1.17623							38.5	1
						37.5	1.17367							38	1
						37	1.17111							37.5	1
						36.5	1.16857							37	1
						36	1.16603							36.5	1
						35.5	1.1635							36	1
						35	1.16098							35.5	1
						34.5	1.15847							35	1
						34	1							34.5	1
						33.5	1							34	1
						33	1							33.5	1
						32.5	1							33	1
						32	1							32.5	1
						31.5	1							32	1
						31	1							31.5	1
						30.5	1							31	1
						30	1							30.5	1
						29.5	1							30	1
						29	1							29.5	1
						28.5	1							29	1
						28	1							28.5	1
						27.5	1							28	1
						27	1							27.5	1
						26.5	1							27	1
						26	1							26.5	1
						25.5	1							26	1
						25	1							25.5	1
						24.5	1							25	1
						24	1							24.5	1
						23.5	1							24	1
						23	1							23.5	1
						22.5	1							23	1
						22	1							22.5	1
						21.5	1							22	1
						21	1							21.5	1
						20.5	1							21	1
						20	1							20.5	1
						19.5	1							20	1
						19	1							19.5	1
						18.5	1							19	1
						18	1							18.5	1
						17.5	1							18	1
						17	1							17.5	1
						16.5	1							17	1
						16	1							16.5	1
						15.5	1							16	1
						15	1							15.5	1
						14.5	1							15	1
						14	1							14.5	1
						13.5	1							14	1
						13	1							13.5	1
						12.5	1							13	1
						12	1							12.5	1
						11.5	1							12	1
						11	1							11.5	1
						10.5	1							11	1
						10	1							10.5	1
						9.5	1							10	1
						9	1							9.5	1
						8.5	1							9	1
						8	1							8.5	1
						7.5	1							8	1
						7	1							7.5	1
						6.5	1							7	1
						6	1							6.5	1
						5.5	1							6	1
						5	1							5.5	1
						4.5	1							5	1
						4	1							4.5	1
						3.5	1							4	1
						3	1							3.5	1
						2.5	1							3	1
						2	1							2.5	1
						1.5	1							2	1
						1	1							1.5	1
						0.5	1							1	1
						--	--							0.5	1
						--	--
						--	--
						--	--
						--	--
						--	--
						--	--
						--	--
						--	--
						--	--
						--	--
						--	--
						--	--
						--	--
						--	--
						--	--
						--	--
						--	--
						--	--
						--	--
						--	--
						--	--
						--	--
						--	--
						--	--
						--	--
						--	--
						--	--
						--	--
						--	--
						--	--
						--	--
						--	--
						--	--
						--	--
						--	--
						--	--
						--	--
						--	--
						--	--
						--	--
						--	--
						--	--
						--	--
						--	--
						--	--
						--	--
						--	--
						--	--
						--	--
						--	--
						--	--
						--	--
						--	--
						--	--
						--	--
						--	--
						--	--
						--	--
						--	--
						--	--
						--	--
						--	--
						--	--
						--	--
						--	--
						--	--
						--	--
						--	--
						--	--
						--	--
						--	--
						--	--
						--	--
						--	--
						--	--
						--	--
						--	--
						--	--
						--	--
						--	--
						--	--
						--	--
						--	--
						--	--
						--	--
						--	--
						--	--
						--	--
						--	--
						--	--
						--	--
						--	--
						--	--
						--	--
						--	--
						--	--
						--	--
						--	--
						--	--
						--	--
						--	--
						--	--
						--	--
						--	--
						--	--
						--	--
						--	--
						--	--
						--	--
						--	--
						--	--
						--	--
						--	--
						--	--
						--	--
						--	--
						--	--
						--	--
						--	--
						--	--
						--	--
						--	--
						--	--
						--	--
						--	--
						--	--
						--	--
						--	--
						--	--
						--	--
						--	--
						--	--
						--	--
						--	--
						--	--
						--	--
						--	--

## Sheet: levoglucosan (100nm)
dehumidification mode				AIOMFAC dehumidification		AIM(UNIFAC) dehumidification		Fitted expression		humidification mode
				99.9844	2.58481	UNIFAC	--	fittedRH			aw
RH	measureGF			99.9196	2.46653	--	--	99	2.21973	5	1.00702	1.5	0.02
90	1.3	1.5	0.02	99.8594	2.37312	RH	GFLevoglucosan	98.75	2.08108	10	1.00902	1.5	0.02
85	1.23	1.5	0.02	99.6844	2.16132	5	1.01034	98.5	1.9772	20	1.02616	1.5	0.02
80	1.19	1.5	0.02	99.4992	2.00039	6.175	1.01251	98.25	1.89566	30	1.03718	1.5	0.02
75	1.16	1.5	0.02	99.3037	1.87665	7.35	1.01462	98	1.82952	40	1.0462	1.5	0.02
70	1.14	1.5	0.02	99.0983	1.78161	8.525	1.01668	97.75	1.77451	50	1.07034	1.5	0.02
68	1.12	1.5	0.02	98.662	1.65147	9.7	1.0187	97.5	1.72786	60	1.08648	1.5	0.02
65	1.1	1.5	0.02	98.2022	1.56947	10.875	1.02069	97.25	1.68769	70	1.13768	1.5	0.02
58	1.09	1.5	0.02	97.7283	1.51328	12.05	1.02265	97	1.65265	75	1.15982	1.5	0.02
55	1.07	1.5	0.02	97.2459	1.47189	13.225	1.02459	96.75	1.62176	80	1.17385	1.5	0.02
50	1.06	1.5	0.02	96.758	1.43971	14.4	1.02651	96.5	1.59427	85	1.21804	1.5	0.02
45	1.05	1.5	0.02	96.2664	1.41369	15.575	1.02842	96.25	1.56962	90	1.37385	1.5	0.02
40	1.05	1.5	0.02	95.7721	1.39199	16.75	1.03032	96	1.54737
35	1.04	1.5	0.02	95.2757	1.37349	17.925	1.03221	95.75	1.52715
30	1.03	1.5	0.02	94.7779	1.35742	19.1	1.03409	95.5	1.50869
25	1.02	1.5	0.02	94.2788	1.34325	20.275	1.03597	95.25	1.49175
20	1.02	1.5	0.02	93.7787	1.33061	21.45	1.03786	95	1.47614
15	1.01	1.5	0.02	93.2778	1.31923	22.625	1.03974	94.75	1.4617
10	1.01	1.5	0.02	92.7763	1.30888	23.8	1.04163	94.5	1.44828
				92.2741	1.29941	24.975	1.04352	94.25	1.43579
				91.7715	1.29069	26.15	1.04543	94	1.42412
				91.2685	1.28261	27.325	1.04734	93.75	1.41319
				90.7651	1.2751	28.5	1.04926	93.5	1.40292
				90.2613	1.26808	29.675	1.0512	93.25	1.39325
				89.7573	1.26149	30.85	1.05316	93	1.38412
				89.253	1.25529	32.025	1.05513	92.75	1.37549
				88.7485	1.24944	33.2	1.05712	92.5	1.36732
				88.2438	1.2439	34.375	1.05913	92.25	1.35957
				87.739	1.23864	35.55	1.06116	92	1.35219
				87.2339	1.23363	36.725	1.06321	91.75	1.34517
				86.7287	1.22886	37.9	1.06529	91.5	1.33847
				86.2234	1.22431	39.075	1.0674	91.25	1.33208
				85.7179	1.21995	40.25	1.06954	91	1.32596
				85.2124	1.21577	41.425	1.07171	90.75	1.32011
				84.7067	1.21175	42.6	1.07391	90.5	1.31449
				84.2009	1.20789	43.775	1.07616	90.25	1.3091
				83.695	1.20418	44.95	1.07843	90	1.30393
				83.1891	1.2006	46.125	1.08075	89.75	1.29894
				82.683	1.19714	47.3	1.08311	89.5	1.29415
				82.1769	1.1938	48.475	1.08552	89.25	1.28952
				81.6707	1.19057	49.65	1.08798	89	1.28506
				81.1645	1.18744	50.825	1.09049	88.75	1.28076
				80.6582	1.18441	52	1.09305	88.5	1.27659
				80.1518	1.18146	53.175	1.09567	88.25	1.27257
				79.6454	1.17861	54.35	1.09836	88	1.26867
				79.139	1.17583	55.525	1.10112	87.75	1.2649
				78.6325	1.17314	56.7	1.10394	87.5	1.26124
				78.1259	1.17051	57.875	1.10684	87.25	1.25768
				77.6193	1.16795	59.05	1.10982	87	1.25424
				77.1127	1.16546	60.225	1.11289	86.75	1.25089
				76.606	1.16303	61.4	1.11605	86.5	1.24763
				76.0993	1.16066	62.575	1.11931	86.25	1.24447
				75.5926	1.15835	63.75	1.12268	86	1.24139
				75.0858	1.15609	64.925	1.12617	85.75	1.23839
				74.579	1.15388	66.1	1.12978	85.5	1.23547
				74.0721	1.15172	67.275	1.13353	85.25	1.23262
				73.5653	1.1496	68.45	1.13742	85	1.22984
				73.0584	1.14754	69.625	1.14148	84.75	1.22713
				72.5515	1.14551	70.8	1.14571	84.5	1.22448
				72.0446	1.14353	71.975	1.15013	84.25	1.22189
				71.5376	1.14158	73.15	1.15477	84	1.21937
				71.0306	1.13968	74.325	1.15964	83.75	1.2169
				70.5237	1.13781	75.5	1.16476	83.5	1.21448
				70.0166	1.13597	76.675	1.17018	83.25	1.21212
				69.5096	1.13417	77.85	1.17592	83	1.20981
				69.0026	1.1324	79.025	1.18203	82.75	1.20754
				68.4955	1.13067	80.2	1.18855	82.5	1.20532
				67.9884	1.12896	81.375	1.19554	82.25	1.20315
				67.4813	1.12728	82.55	1.20309	82	1.20102
				66.9742	1.12563	83.725	1.21127	81.75	1.19893
				66.4671	1.12401	84.9	1.22022	81.5	1.19688
				65.9599	1.12241	86.075	1.23007	81.25	1.19487
				65.4528	1.12084	87.25	1.24103	81	1.1929
				64.9456	1.1193	88.425	1.25336	80.75	1.19096
				64.4384	1.11778	89.6	1.26745	80.5	1.18905
				63.9312	1.11628	90.775	1.28385	80.25	1.18718
				63.424	1.1148	91.95	1.3034	80	1.18535
				62.9168	1.11334	93.125	1.32754	79.75	1.18354
				62.4096	1.11191	94.3	1.35884	79.5	1.18176
				61.9024	1.1105	95.475	1.40281	79.25	1.18001
				61.3951	1.1091	96.65	1.47454	79	1.17829
				60.8879	1.10772	97.825	1.64286	78.75	1.1766
				60.3806	1.10637	99	2.3703	78.5	1.17494
				59.8734	1.10503	--	--	78.25	1.1733
				59.3661	1.1037	--	--	78	1.17168
				58.8588	1.1024	--	--	77.75	1.17009
				58.3515	1.10111	--	--	77.5	1.16853
				57.8442	1.09984			77.25	1.16698
				57.3369	1.09858			77	1.16546
				56.8296	1.09734			76.75	1.16396
				56.3223	1.09611			76.5	1.16248
				55.8149	1.0949			76.25	1.16102
				55.3076	1.0937			76	1.15958
				54.8003	1.09251			75.75	1.15816
				54.2929	1.09134			75.5	1.15676
				53.7856	1.09018			75.25	1.15538
				53.2782	1.08903			75	1.15401
				52.7709	1.0879			74.75	1.15266
				52.2635	1.08677			74.5	1.15133
				51.7561	1.08566			74.25	1.15002
				51.2488	1.08456			74	1.14872
				50.7414	1.08347			73.75	1.14744
				50.234	1.08239			73.5	1.14617
				49.7266	1.08132			73.25	1.14492
				49.2193	1.08026			73	1.14368
				48.7119	1.07922			72.75	1.14245
				48.2045	1.07818			72.5	1.14124
				47.6971	1.07715			72.25	1.14005
				47.1897	1.07613			72	1.13886
				46.6823	1.07512			71.75	1.13769
				46.1749	1.07411			71.5	1.13653
				45.6675	1.07312			71.25	1.13539
				45.1601	1.07213			71	1.13426
				44.6527	1.07116			70.75	1.13313
				44.1452	1.07018			70.5	1.13202
				43.6378	1.06922			70.25	1.13092
				43.1304	1.06827			70	1.12984
				42.623	1.06732			69.75	1.12876
				42.1156	1.06638			69.5	1.12769
				41.6082	1.06545			69.25	1.12664
				41.1007	1.06452			69	1.12559
				40.5933	1.0636			68.75	1.12455
				40.0859	1.06269			68.5	1.12353
				39.5784	1.06178			68.25	1.12251
				39.071	1.06088			68	1.12151
				38.5636	1.05999			67.75	1.12051
				38.0562	1.0591			67.5	1.11952
				37.5487	1.05822			67.25	1.11854
				37.0413	1.05734			67	1.11757
				36.5338	1.05647			66.75	1.11661
				36.0264	1.0556			66.5	1.11565
				35.519	1.05474			66.25	1.11471
				35.0115	1.05389			66	1.11377
				34.5041	1.05304			65.75	1.11284
				33.9967	1.05219			65.5	1.11192
				33.4892	1.05135			65.25	1.111
				32.9818	1.05051			65	1.1101
				32.4743	1.04968			64.75	1.1092
				31.9669	1.04885			64.5	1.1083
				31.4595	1.04803			64.25	1.10742
				30.952	1.04721			64	1.10654
				30.4446	1.04639			63.75	1.10567
				29.9371	1.04558			63.5	1.10481
				29.4297	1.04477			63.25	1.10395
				28.9222	1.04397			63	1.1031
				28.4148	1.04317			62.75	1.10226
				27.9074	1.04237			62.5	1.10142
				27.3999	1.04157			62.25	1.10059
				26.8925	1.04078			62	1.09977
				26.385	1.04			61.75	1.09895
				25.8776	1.03921			61.5	1.09814
				25.3702	1.03843			61.25	1.09733
				24.8627	1.03765			61	1.09653
				24.3553	1.03687			60.75	1.09573
				23.8479	1.0361			60.5	1.09495
				23.3404	1.03532			60.25	1.09416
				22.833	1.03455			60	1.09338
				22.3255	1.03378			59.75	1.09261
				21.8181	1.03302			59.5	1.09185
				21.3107	1.03225			59.25	1.09109
				20.8032	1.03149			59	1.09033
				20.2958	1.03073			58.75	1.08958
				19.7884	1.02997			58.5	1.08883
				19.281	1.02922			58.25	1.08809
				18.7735	1.02846			58	1.08736
				18.2661	1.0277			57.75	1.08663
				17.7587	1.02695			57.5	1.0859
				17.2512	1.0262			57.25	1.08518
				16.7438	1.02545			57	1.08447
				16.2364	1.02469			56.75	1.08376
				15.729	1.02394			56.5	1.08305
				15.2216	1.02319			56.25	1.08235
				14.7142	1.02244			56	1.08165
				14.2067	1.02169			55.75	1.08096
				13.6993	1.02095			55.5	1.08027
				13.1919	1.0202			55.25	1.07959
				12.6845	1.01944			55	1.07891
				12.1771	1.01869			54.75	1.07823
				11.6697	1.01794			54.5	1.07756
				11.1623	1.01719			54.25	1.0769
				10.6549	1.01644			54	1.07624
				10.1475	1.01569			53.75	1.07558
				9.64008	1.01493			53.5	1.07492
				9.13268	1.01417			53.25	1.07428
				8.62529	1.01342			53	1.07363
				8.11789	1.01266			52.75	1.07299
				7.6105	1.01189			52.5	1.07235
				7.10312	1.01113			52.25	1.07172
				6.59573	1.01036			52	1.07109
				6.08835	1.00959			51.75	1.07046
				5.58097	1.00882			51.5	1.06984
				5.07359	1.00804			51.25	1.06922
				4.56622	1.00726			51	1.06861
				4.05885	1.00648			50.75	1.068
				3.55148	1.00569			50.5	1.06739
				3.04412	1.00489			50.25	1.06679
				2.53676	1.00409			50	1.06619
				2.0294	1.00329			49.75	1.06559
				1.52204	1.00248			49.5	1.065
				1.01469	1.00166			49.25	1.06441
				0.50734	1.00083			49	1.06383
				0.10147	1.00017			48.75	1.06324
				--	--			48.5	1.06267
								48.25	1.06209
								48	1.06152
								47.75	1.06095
								47.5	1.06039
								47.25	1.05982
								47	1.05927
								46.75	1.05871
								46.5	1.05816
								46.25	1.05761
								46	1.05707
								45.75	1.05653
								45.5	1.05599
								45.25	1.05545
								45	1.05492
								44.75	1.05439
								44.5	1.05386
								44.25	1.05334
								44	1.05282
								43.75	1.0523
								43.5	1.05179
								43.25	1.05128
								43	1.05077
								42.75	1.05027
								42.5	1.04976
								42.25	1.04926
								42	1.04877
								41.75	1.04828
								41.5	1.04778
								41.25	1.0473
								41	1.04681
								40.75	1.04633
								40.5	1.04585
								40.25	1.04538
								40	1.0449
								39.75	1.04443
								39.5	1.04396
								39.25	1.0435
								39	1.04304
								38.75	1.04258
								38.5	1.04212
								38.25	1.04167
								38	1.04122
								37.75	1.04077
								37.5	1.04032
								37.25	1.03988
								37	1.03944
								36.75	1.039
								36.5	1.03856
								36.25	1.03813
								36	1.0377
								35.75	1.03727
								35.5	1.03685
								35.25	1.03643
								35	1.03601
								34.75	1.03559
								34.5	1.03518
								34.25	1.03476
								34	1.03435
								33.75	1.03395
								33.5	1.03354
								33.25	1.03314
								33	1.03274
								32.75	1.03234
								32.5	1.03195
								32.25	1.03156
								32	1.03117
								31.75	1.03078
								31.5	1.0304
								31.25	1.03001
								31	1.02963
								30.75	1.02926
								30.5	1.02888
								30.25	1.02851
								30	1.02814
								29.75	1.02777
								29.5	1.02741
								29.25	1.02704
								29	1.02668
								28.75	1.02633
								28.5	1.02597
								28.25	1.02562
								28	1.02527
								27.75	1.02492
								27.5	1.02457
								27.25	1.02423
								27	1.02389
								26.75	1.02355
								26.5	1.02321
								26.25	1.02288
								26	1.02254
								25.75	1.02221
								25.5	1.02189
								25.25	1.02156
								25	1.02124
								24.75	1.02092
								24.5	1.0206
								24.25	1.02028
								24	1.01997
								23.75	1.01966
								23.5	1.01935
								23.25	1.01904
								23	1.01874
								22.75	1.01844
								22.5	1.01814
								22.25	1.01784
								22	1.01754
								21.75	1.01725
								21.5	1.01696
								21.25	1.01667
								21	1.01638
								20.75	1.0161
								20.5	1.01582
								20.25	1.01554
								20	1.01526
								19.75	1.01498
								19.5	1.01471
								19.25	1.01444
								19	1.01417
								18.75	1.0139
								18.5	1.01364
								18.25	1.01338
								18	1.01312
								17.75	1.01286
								17.5	1.0126
								17.25	1.01235
								17	1.0121
								16.75	1.01185
								16.5	1.0116
								16.25	1.01136
								16	1.01112
								15.75	1.01087
								15.5	1.01064
								15.25	1.0104
								15	1.01017
								14.75	1.00993
								14.5	1.00971
								14.25	1.00948
								14	1.00925
								13.75	1.00903
								13.5	1.00881
								13.25	1.00859
								13	1.00837
								12.75	1.00816
								12.5	1.00795
								12.25	1.00774
								12	1.00753
								11.75	1.00732
								11.5	1.00712
								11.25	1.00692
								11	1.00672
								10.75	1.00652
								10.5	1.00632
								10.25	1.00613
								10	1.00594
								9.75	1.00575
								9.5	1.00556
								9.25	1.00538
								9	1.00519
								8.75	1.00501
								8.5	1.00484
								8.25	1.00466
								8	1.00448
								7.75	1.00431
								7.5	1.00414
								7.25	1.00397
								7	1.00381
								6.75	1.00364
								6.5	1.00348
								6.25	1.00332
								6	1.00316
								5.75	1.00301
								5.5	1.00286
								5.25	1.0027
								5	1.00255
								4.75	1.00241
								4.5	1.00226
								4.25	1.00212
								4	1.00198
								3.75	1.00184
								3.5	1.0017
								3.25	1.00157
								3	1.00143
								2.75	1.0013
								2.5	1.00117
								2.25	1.00105
								2	1.00092
								1.75	1.0008
								1.5	1.00068
								1.25	1.00056
								1	1.00045
								0.75	1.00033
								0.5	1.00022

## Sheet: 4-hydroxybenzoic acid (100nm)
dehumidification mode				AIOMFAC in the dehumidification mode		E-AIM in the dehumidification mode		humidification mode
RH	measureGF			--		--	4-PHB		4HBA
90	0.97	1.5	0.01	99	2.5902	5	1.00991	5	1	1.5	0.01
85	0.975	1.5	0.01	98.75	2.3993	6.175	1.01155	10	1	1.5	0.01
80	0.977	1.5	0.01	98.5	2.2534	7.35	1.01309	20	0.988	1.5	0.01
75	0.979	1.5	0.01	98.25	2.1371	8.525	1.01455	30	0.986	1.5	0.01
70	0.98	1.5	0.01	98	2.0413	9.7	1.01597	40	0.987	1.5	0.01
65	0.982	1.5	0.01	97.75	1.9608	10.875	1.01733	50	0.983	1.5	0.01
60	0.983	1.5	0.01	97.5	1.892	12.05	1.01866	60	0.982	1.5	0.01
55	0.984	1.5	0.01	97.25	1.8323	13.225	1.01997	70	0.98	1.5	0.01
50	0.9845	1.5	0.01	97	1.7802	14.4	1.02125	75	0.977	1.5	0.01
45	0.985	1.5	0.01	96.75	1.7342	15.575	1.02252	80	0.972	1.5	0.01
40	0.986	1.5	0.01	96.5	1.6933	16.75	1.02377	85	0.97	1.5	0.01
35	0.987	1.5	0.01	96.25	1.6568	17.925	1.02502	90	0.965	1.5	0.01
30	0.988	1.5	0.01	96	1.6241	19.1	1.02625
25	0.989	1.5	0.01	95.75	1.5946	20.275	1.02749
20	0.99	1.5	0.01	95.5	1.5679	21.45	1.02871
15	0.993	1.5	0.01	95.25	1.5437	22.625	1.02995
10	1	1.5	0.01	95	1.5215	23.8	1.03118
				94.75	1.5013	24.975	1.03241
				94.5	1.4828	26.15	1.03365
				94.25	1.4657	27.325	1.0349
				94	1.45	28.5	1.03616
				93.75	1.4354	29.675	1.03742
				93.5	1.4219	30.85	1.0387
				93.25	1.4093	32.025	1.03999
				93	1.3976	33.2	1.04129
				92.75	1.3866	34.375	1.04261
				92.5	1.3763	35.55	1.04395
				92.25	1.3667	36.725	1.0453
				92	1.3576	37.9	1.04668
				91.75	1.349	39.075	1.04807
				91.5	1.3409	40.25	1.04949
				91.25	1.3333	41.425	1.05094
				91	1.326	42.6	1.05241
				90.75	1.3191	43.775	1.05391
				90.5	1.3126	44.95	1.05544
				90.25	1.3063	46.125	1.057
				90	1.3004	47.3	1.0586
				89.75	1.2947	48.475	1.06024
				89.5	1.2892	49.65	1.06192
				89.25	1.284	50.825	1.06364
				89	1.279	52	1.06541
				88.75	1.2742	53.175	1.06722
				88.5	1.2696	54.35	1.06909
				88.25	1.2652	55.525	1.07102
				88	1.2609	56.7	1.07301
				87.75	1.2568	57.875	1.07506
				87.5	1.2528	59.05	1.07718
				87.25	1.249	60.225	1.07938
				87	1.2453	61.4	1.08166
				86.75	1.2417	62.575	1.08404
				86.5	1.2382	63.75	1.0865
				86.25	1.2349	64.925	1.08908
				86	1.2316	66.1	1.09178
				85.75	1.2284	67.275	1.0946
				85.5	1.2254	68.45	1.09756
				85.25	1.2224	69.625	1.10067
				85	1.2195	70.8	1.10396
				84.75	1.2167	71.975	1.10744
				84.5	1.214	73.15	1.11113
				84.25	1.2113	74.325	1.11507
				84	1.2087	75.5	1.11928
				83.75	1.2062	76.675	1.12381
				83.5	1.2037	77.85	1.1287
				83.25	1.2013	79.025	1.13401
				83	1.199	80.2	1.13982
				82.75	1.1967	81.375	1.14621
				82.5	1.1944	82.55	1.15332
				82.25	1.1923	83.725	1.16129
				82	1.1901	84.9	1.17035
				81.75	1.188	86.075	1.1808
				81.5	1.186	87.25	1.19306
				81.25	1.184	88.425	1.20778
				81	1.182	89.6	1.22599
				80.75	1.1801	90.775	1.24937
				80.5	1.1783	91.95	1.28096
				80.25	1.1764	93.125	1.32646
				80	1.1746	94.3	1.39679
				79.75	1.1728	95.475	1.51033
				79.5	1.1711	96.65	1.69195
				79.25	1.1694	97.825	1.99166
				79	1.1677	99	2.63164
				78.75	1.1661	--	--
				78.5	1.1645	--	--
				78.25	1.1629	--	--
				78	1.1614	--	--
				77.75	1.1598	--	--
				77.5	1.1584	--	--
				77.25	1.1569	--	--
				77	1.1554	--	--
				76.75	1.154	--	--
				76.5	1.1526	--	--
				76.25	1.1512	--	--
				76	1.1499	--	--
				75.75	1.1485	--	--
				75.5	1.1472	--	--
				75.25	1.1459
				75	1.1447
				74.75	1.1434
				74.5	1.1422
				74.25	1.1409
				74	1.1397
				73.75	1.1386
				73.5	1.1374
				73.25	1.1362
				73	1.1351
				72.75	1.134
				72.5	1.1329
				72.25	1.1318
				72	1.1307
				71.75	1.1296
				71.5	1.1286
				71.25	1.1276
				71	1.1265
				70.75	1.1255
				70.5	1.1245
				70.25	1.1235
				70	1.1226
				69.75	1.1216
				69.5	1.1206
				69.25	1.1197
				69	1.1188
				68.75	1.1179
				68.5	1.117
				68.25	1.1161
				68	1.1152
				67.75	1.1143
				67.5	1.1134
				67.25	1.1126
				67	1.1117
				66.75	1.1109
				66.5	1.11
				66.25	1.1092
				66	1.1084
				65.75	1.1076
				65.5	1.1068
				65.25	1.106
				65	1.1052
				64.75	1.1044
				64.5	1.1037
				64.25	1.1029
				64	1.1022
				63.75	1.1014
				63.5	1.1007
				63.25	1.1
				63	1.0992
				62.75	1.0985
				62.5	1.0978
				62.25	1.0971
				62	1.0964
				61.75	1.0957
				61.5	1.095
				61.25	1.0943
				61	1.0937
				60.75	1.093
				60.5	1.0923
				60.25	1.0917
				60	1.091
				59.75	1.0904
				59.5	1.0897
				59.25	1.0891
				59	1.0885
				58.75	1.0878
				58.5	1.0872
				58.25	1.0866
				58	1.086
				57.75	1.0854
				57.5	1.0848
				57.25	1.0842
				57	1.0836
				56.75	1.083
				56.5	1.0824
				56.25	1.0818
				56	1.0813
				55.75	1.0807
				55.5	1.0801
				55.25	1.0796
				55	1.079
				54.75	1.0784
				54.5	1.0779
				54.25	1.0773
				54	1.0768
				53.75	1.0763
				53.5	1.0757
				53.25	1.0752
				53	1.0747
				52.75	1.0741
				52.5	1.0736
				52.25	1.0731
				52	1.0726
				51.75	1.0721
				51.5	1.0716
				51.25	1.0711
				51	1.0706
				50.75	1.0701
				50.5	1.0696
				50.25	1.0691
				50	1.0686
				49.75	1.0681
				49.5	1.0676
				49.25	1.0671
				49	1.0667
				48.75	1.0662
				48.5	1.0657
				48.25	1.0652
				48	1.0648
				47.75	1.0643
				47.5	1.0639
				47.25	1.0634
				47	1.0629
				46.75	1.0625
				46.5	1.062
				46.25	1.0616
				46	1.0611
				45.75	1.0607
				45.5	1.0603
				45.25	1.0598
				45	1.0594
				44.75	1.059
				44.5	1.0585
				44.25	1.0581
				44	1.0577
				43.75	1.0572
				43.5	1.0568
				43.25	1.0564
				43	1.056
				42.75	1.0556
				42.5	1.0551
				42.25	1.0547
				42	1.0543
				41.75	1.0539
				41.5	1.0535
				41.25	1.0531
				41	1.0527
				40.75	1.0523
				40.5	1.0519
				40.25	1.0515
				40	1.0511
				39.75	1.0507
				39.5	1.0503
				39.25	1.0499
				39	1.0495
				38.75	1.0492
				38.5	1.0488
				38.25	1.0484
				38	1.048
				37.75	1.0476
				37.5	1.0473
				37.25	1.0469
				37	1.0465
				36.75	1.0461
				36.5	1.0458
				36.25	1.0454
				36	1.045
				35.75	1.0447
				35.5	1.0443
				35.25	1.0439
				35	1.0436
				34.75	1.0432
				34.5	1.0428
				34.25	1.0425
				34	1.0421
				33.75	1.0418
				33.5	1.0414
				33.25	1.0411
				33	1.0407
				32.75	1.0404
				32.5	1.04
				32.25	1.0397
				32	1.0393
				31.75	1.039
				31.5	1.0386
				31.25	1.0383
				31	1.0379
				30.75	1.0376
				30.5	1.0373
				30.25	1.0369
				30	1.0366
				29.75	1.0363
				29.5	1.0359
				29.25	1.0356
				29	1.0352
				28.75	1.0349
				28.5	1.0346
				28.25	1.0343
				28	1.0339
				27.75	1.0336
				27.5	1.0333
				27.25	1.0329
				27	1.0326
				26.75	1.0323
				26.5	1.032
				26.25	1.0317
				26	1.0313
				25.75	1.031
				25.5	1.0307
				25.25	1.0304
				25	1.0301
				24.75	1.0297
				24.5	1.0294
				24.25	1.0291
				24	1.0288
				23.75	1.0285
				23.5	1.0282
				23.25	1.0278
				23	1.0275
				22.75	1.0272
				22.5	1.0269
				22.25	1.0266
				22	1.0263
				21.75	1.026
				21.5	1.0257
				21.25	1.0254
				21	1.0251
				20.75	1.0248
				20.5	1.0245
				20.25	1.0242
				20	1.0238
				19.75	1.0235
				19.5	1.0232
				19.25	1.0229
				19	1.0226
				18.75	1.0223
				18.5	1.022
				18.25	1.0217
				18	1.0214
				17.75	1.0211
				17.5	1.0208
				17.25	1.0205
				17	1.0202
				16.75	1.0199
				16.5	1.0196
				16.25	1.0193
				16	1.0191
				15.75	1.0188
				15.5	1.0185
				15.25	1.0182
				15	1.0179
				14.75	1.0176
				14.5	1.0173
				14.25	1.017
				14	1.0167
				13.75	1.0164
				13.5	1.0161
				13.25	1.0158
				13	1.0155
				12.75	1.0152
				12.5	1.0149
				12.25	1.0146
				12	1.0143
				11.75	1.0141
				11.5	1.0138
				11.25	1.0135
				11	1.0132
				10.75	1.0129
				10.5	1.0126
				10.25	1.0123
				10	1.012
				9.75	1.0117
				9.5	1.0114
				9.25	1.0111
				9	1.0108
				8.75	1.0105
				8.5	1.0102
				8.25	1.01
				8	1.0097
				7.75	1.0094
				7.5	1.0091
				7.25	1.0088
				7	1.0085
				6.75	1.0082
				6.5	1.0079
				6.25	1.0076
				6	1.0073
				5.75	1.007
				5.5	1.0067
				5.25	1.0064
				5	1.0061
				4.75	1.0058
				4.5	1.0055
				4.25	1.0052
				4	1.0049
				3.75	1.0046
				3.5	1.0043
				3.25	1.004
				3	1.0037
				2.75	1.0034
				2.5	1.0031
				2.25	1.0028
				2	1.0025
				1.75	1.0022
				1.5	1.0019
				1.25	1.0016
				1	1.0013
				0.75	1.0009
				0.5	1.0006

## Sheet: humic acid (100nm)
dehumidification mode				fitted expression		humidification mode
AS		--	--	fittedRH			HM
RH	HM	--	--	99	2.84098	5	1.00301	2.5	0.01
		--	--	98.75	2.64232	10	1.00301	2.5	0.01
85	1.27	2.5	0.01	98.5	2.49121	20	1.02307	2.5	0.01
80	1.2	2.5	0.01	98.25	2.37089	30	1.0331	2.5	0.01
75	1.14	2.5	0.01	98	2.27193	40	1.03811	2.5	0.01
70	1.09	2.5	0.01	97.75	2.18855	50	1.04313	2.5	0.01
65	1.07	2.5	0.01	97.5	2.11696	60	1.06118	2.5	0.01
60	1.06	2.5	0.01	97.25	2.05457	65	1.07021	2.5	0.01
55	1.05	2.5	0.01	97	1.99954	70	1.08726	2.5	0.01
50	1.04	2.5	0.01	96.75	1.95049	75	1.09127	2.5	0.01
45	1.03	2.5	0.01	96.5	1.90641	80	1.12638	2.5	0.01
40	1.02	2.5	0.01	96.25	1.86649	85	1.17252	2.5	0.01
35	1.01	2.5	0.01	96	1.83011	90	1.25577	2.5	0.01
30	1	2.5	0.01	95.75	1.79678
25	1	2.5	0.01	95.5	1.76608
20	1	2.5	0.01	95.25	1.73769
15	1	2.5	0.01	95	1.71132
10	1	2.5	0.01	94.75	1.68676
5	--	--	--	94.5	1.6638
				94.25	1.64227
				94	1.62203
				93.75	1.60297
				93.5	1.58497
				93.25	1.56793
				93	1.55178
				92.75	1.53644
				92.5	1.52185
				92.25	1.50795
				92	1.49469
				91.75	1.48202
				91.5	1.4699
				91.25	1.4583
				91	1.44717
				90.75	1.43649
				90.5	1.42623
				90.25	1.41636
				90	1.40686
				89.75	1.39771
				89.5	1.38889
				89.25	1.38038
				89	1.37216
				88.75	1.36422
				88.5	1.35655
				88.25	1.34912
				88	1.34193
				87.75	1.33497
				87.5	1.32822
				87.25	1.32168
				87	1.31533
				86.75	1.30916
				86.5	1.30318
				86.25	1.29736
				86	1.29171
				85.75	1.28621
				85.5	1.28086
				85.25	1.27566
				85	1.27059
				84.75	1.26566
				84.5	1.26085
				84.25	1.25616
				84	1.2516
				83.75	1.24714
				83.5	1.24279
				83.25	1.23855
				83	1.23441
				82.75	1.23037
				82.5	1.22642
				82.25	1.22256
				82	1.21879
				81.75	1.2151
				81.5	1.2115
				81.25	1.20798
				81	1.20453
				80.75	1.20116
				80.5	1.19786
				80.25	1.19463
				80	1.19147
				79.75	1.18837
				79.5	1.18534
				79.25	1.18237
				79	1.17945
				78.75	1.1766
				78.5	1.17381
				78.25	1.17107
				78	1.16838
				77.75	1.16574
				77.5	1.16316
				77.25	1.16062
				77	1.15814
				76.75	1.1557
				76.5	1.1533
				76.25	1.15095
				76	1.14864
				75.75	1.14638
				75.5	1.14415
				75.25	1.14197
				75	1.13982
				74.75	1.13771
				74.5	1.13564
				74.25	1.13361
				74	1.13161
				73.75	1.12964
				73.5	1.12771
				73.25	1.12581
				73	1.12395
				72.75	1.12211
				72.5	1.12031
				72.25	1.11854
				72	1.11679
				71.75	1.11508
				71.5	1.11339
				71.25	1.11173
				71	1.11009
				70.75	1.10849
				70.5	1.10691
				70.25	1.10535
				70	1.10382
				69.75	1.10231
				69.5	1.10083
				69.25	1.09936
				69	1.09793
				68.75	1.09651
				68.5	1.09512
				68.25	1.09374
				68	1.09239
				67.75	1.09106
				67.5	1.08975
				67.25	1.08846
				67	1.08719
				66.75	1.08593
				66.5	1.0847
				66.25	1.08348
				66	1.08228
				65.75	1.0811
				65.5	1.07994
				65.25	1.07879
				65	1.07766
				64.75	1.07655
				64.5	1.07545
				64.25	1.07437
				64	1.0733
				63.75	1.07225
				63.5	1.07122
				63.25	1.0702
				63	1.06919
				62.75	1.0682
				62.5	1.06722
				62.25	1.06625
				62	1.0653
				61.75	1.06436
				61.5	1.06344
				61.25	1.06252
				61	1.06162
				60.75	1.06074
				60.5	1.05986
				60.25	1.059
				60	1.05815
				59.75	1.05731
				59.5	1.05648
				59.25	1.05566
				59	1.05485
				58.75	1.05406
				58.5	1.05327
				58.25	1.0525
				58	1.05174
				57.75	1.05098
				57.5	1.05024
				57.25	1.04951
				57	1.04878
				56.75	1.04807
				56.5	1.04736
				56.25	1.04667
				56	1.04598
				55.75	1.0453
				55.5	1.04464
				55.25	1.04398
				55	1.04333
				54.75	1.04268
				54.5	1.04205
				54.25	1.04142
				54	1.04081
				53.75	1.0402
				53.5	1.0396
				53.25	1.039
				53	1.03842
				52.75	1.03784
				52.5	1.03727
				52.25	1.03671
				52	1.03615
				51.75	1.0356
				51.5	1.03506
				51.25	1.03452
				51	1.034
				50.75	1.03348
				50.5	1.03296
				50.25	1.03245
				50	1.03195
				49.75	1.03146
				49.5	1.03097
				49.25	1.03049
				49	1.03001
				48.75	1.02954
				48.5	1.02908
				48.25	1.02862
				48	1.02817
				47.75	1.02772
				47.5	1.02728
				47.25	1.02685
				47	1.02642
				46.75	1.026
				46.5	1.02558
				46.25	1.02517
				46	1.02476
				45.75	1.02436
				45.5	1.02396
				45.25	1.02357
				45	1.02318
				44.75	1.0228
				44.5	1.02242
				44.25	1.02205
				44	1.02169
				43.75	1.02132
				43.5	1.02097
				43.25	1.02061
				43	1.02026
				42.75	1.01992
				42.5	1.01958
				42.25	1.01925
				42	1.01892
				41.75	1.01859
				41.5	1.01827
				41.25	1.01795
				41	1.01764
				40.75	1.01733
				40.5	1.01702
				40.25	1.01672
				40	1.01642
				39.75	1.01613
				39.5	1.01584
				39.25	1.01555
				39	1.01527
				38.75	1.01499
				38.5	1.01472
				38.25	1.01445
				38	1.01418
				37.75	1.01392
				37.5	1.01366
				37.25	1.0134
				37	1.01315
				36.75	1.0129
				36.5	1.01265
				36.25	1.01241
				36	1.01217
				35.75	1.01193
				35.5	1.0117
				35.25	1.01147
				35	1.01125
				34.75	1.01102
				34.5	1.0108
				34.25	1.01058
				34	1.01037
				33.75	1.01016
				33.5	1.00995
				33.25	1.00975
				33	1.00954
				32.75	1.00934
				32.5	1.00915
				32.25	1.00895
				32	1.00876
				31.75	1.00857
				31.5	1.00839
				31.25	1.00821
				31	1.00803
				30.75	1.00785
				30.5	1.00767
				30.25	1.0075
				30	1.00733
				29.75	1.00716
				29.5	1.007
				29.25	1.00684
				29	1.00668
				28.75	1.00652
				28.5	1.00637
				28.25	1.00621
				28	1.00606
				27.75	1.00592
				27.5	1.00577
				27.25	1.00563
				27	1.00549
				26.75	1.00535
				26.5	1.00521
				26.25	1.00508
				26	1.00495
				25.75	1.00482
				25.5	1.00469
				25.25	1.00456
				25	1.00444
				24.75	1.00432
				24.5	1.0042
				24.25	1.00408
				24	1.00397
				23.75	1.00385
				23.5	1.00374
				23.25	1.00363
				23	1.00353
				22.75	1.00342
				22.5	1.00332
				22.25	1.00322
				22	1.00312
				21.75	1.00302
				21.5	1.00292
				21.25	1.00283
				21	1.00274
				20.75	1.00264
				20.5	1.00256
				20.25	1.00247
				20	1.00238
				19.75	1.0023
				19.5	1.00222
				19.25	1.00214
				19	1.00206
				18.75	1.00198
				18.5	1.00191
				18.25	1.00183
				18	1.00176
				17.75	1.00169
				17.5	1.00162
				17.25	1.00155
				17	1.00149
				16.75	1.00142
				16.5	1.00136
				16.25	1.0013
				16	1.00124
				15.75	1.00118
				15.5	1.00113
				15.25	1.00107
				15	1.00102
				14.75	1.00096
				14.5	1.00091
				14.25	1.00086
				14	1.00082
				13.75	1.00077
				13.5	1.00072
				13.25	1.00068
				13	1.00064
				12.75	1.0006
				12.5	1.00055
				12.25	1.00052
				12	1.00048
				11.75	1.00044
				11.5	1.00041
				11.25	1.00037
				11	1.00034
				10.75	1.00031
				10.5	1.00028
				10.25	1.00025
				10	1.00022
				9.75	1.0002
				9.5	1.00017
				9.25	1.00015
				9	1.00013
				8.75	1.0001
				8.5	1.00008
				8.25	1.00006
				8	1.00005
				7.75	1.00003
				7.5	1.00001
				7.25	1
				7	0.99998
				6.75	0.99997
				6.5	0.99996
				6.25	0.99995
				6	0.99994
				5.75	0.99993
				5.5	0.99992
				5.25	0.99992
				5	0.99991
				4.75	0.99991
				4.5	0.9999
				4.25	0.9999
				4	0.9999
				3.75	0.9999
				3.5	0.9999
				3.25	0.9999
				3	0.9999
				2.75	0.9999
				2.5	0.99991
				2.25	0.99991
				2	0.99992
				1.75	0.99993
				1.5	0.99993
				1.25	0.99994
				1	0.99995
				0.75	0.99996
				0.5	0.99997

## Sheet: Ammonium sulfate+levoglucosan 
Ammonium sulfate+levoglucosan by mass ratio of 3:1 in the dehumidification mode				AIOMFAC in the dehumidification mode		AIOMFAC in the humidification mode		E-AIM in the humdification mode			Ammonium sulfate+levoglucosan by mass ratio of 1:1 in the dehumidification mode				AIOMFAC in the dehumification mode		E-AIM in the dehumidification mode		AIOMFAC in the humidification mode		E-AIM in the humidification mode			Ammonium sulfate+levoglucosan by mass ratio of 1:3 in the dehumidification mode				AIOMFAC in the dehumidification mode		E-AIM in the dehumidification mode		AIOMFAC in the humidification mode		E-AIM in the humidification mode
				--	--	99.9	7.9431	5	1.00458		measured RH				99.9	7.27586	E-AIM		99.9	7.27586	5	1.0089		measured RH				99.9	6.50633		--	99.9	6.50633	5	1.01301
RH	measured GF			99.9	7.9431	99.89	7.68238	6.175	1.0055		90	1.64	2.5	0.015	99.89	7.03986	RH		99.89	7.03986	6.175	1.01077		90	1.5	2.5	0.01	99.89	6.29828	E-AIM	--	99.89	6.29828	6.175	1.0157
90	1.75	2.5	0.02	99.89	7.68238	99.88	7.45157	7.35	1.00652		85	1.45	2.5	0.015	99.88	6.83095	24.975	1.03795	99.88	6.83095	7.35	1.01257		85	1.36	2.5	0.01	99.88	6.11406	8.525	1.02087	99.88	6.11406	7.35	1.01831
85	1.57	2.5	0.02	99.88	7.45157	99.87	7.24517	8.525	1.00738		80	1.38	2.5	0.015	99.87	6.64413	26.15	1.10475	99.87	6.64413	8.525	1.01431		80	1.3	2.5	0.01	99.87	5.94928	9.7	1.05275	99.87	5.94928	8.525	1.02087
80	1.45	2.5	0.02	99.87	7.24517	99.86	7.05899	9.7	1.00822		75	1.3	2.5	0.015	99.86	6.47562	27.325	1.10735	99.86	6.47562	9.7	1.01602		75	1.25	2.5	0.01	99.86	5.8006	10.875	1.05537	99.86	5.8006	9.7	1.02337
75	1.37	2.5	0.02	99.86	7.05899	99.85	6.88983	10.875	1.00919		70	1.26	2.5	0.015	99.85	6.3225	28.5	1.10995	99.85	6.3225	10.875	1.01779		70	1.2	2.5	0.01	99.85	5.66547	12.05	1.05788	99.85	5.66547	10.875	1.02583
70	1.33	2.5	0.02	99.85	6.88983	99.84	6.73513	12.05	1.01		65	1.21	2.5	0.015	99.84	6.18248	29.675	1.11256	99.84	6.18248	12.05	1.01945		65	1.18	2.5	0.01	99.84	5.54188	13.225	1.06031	99.84	5.54188	12.05	1.02827
65	1.28	2.5	0.02	99.84	6.73513	99.83	6.59288	13.225	1.01095		60	1.19	2.5	0.015	99.83	6.05373	30.85	1.11518	99.83	6.05373	13.225	1.02109		60	1.15	2.5	0.01	99.83	5.42819	14.4	1.06268	99.83	5.42819	13.225	1.03068
60	1.24	2.5	0.02	99.83	6.59288	99.82	6.46143	14.4	1.01176		55	1.16	2.5	0.015	99.82	5.93474	32.025	1.11783	99.82	5.93474	14.4	1.02281		55	1.14	2.5	0.01	99.82	5.3231	15.575	1.065	99.82	5.3231	14.4	1.03308
55	1.2	2.5	0.02	99.82	6.46143	99.81	6.33943	15.575	1.0127		50	1.13	2.5	0.015	99.81	5.82431	33.2	1.12049	99.81	5.82431	15.575	1.02444		50	1.11	2.5	0.01	99.81	5.22553	16.75	1.06727	99.81	5.22553	15.575	1.03547
50	1.16	2.5	0.02	99.81	6.33943	99.8	6.22575	16.75	1.01351		45	1.12	2.5	0.015	99.8	5.72141	34.375	1.12318	99.8	5.72141	16.75	1.02607		45	1.09	2.5	0.01	99.8	5.1346	17.925	1.06951	99.8	5.1346	16.75	1.03786
45	1.14	2.5	0.02	99.8	6.22575	99.79	6.11946	17.925	1.01432		40	1.09	2.5	0.015	99.79	5.62519	35.55	1.12589	99.79	5.62519	17.925	1.0278		40	1.08	2.5	0.01	99.79	5.04955	19.1	1.07173	99.79	5.04955	17.925	1.04025
40	1.07	2.5	0.02	99.79	6.11946	99.77	5.92595	19.1	1.01528		35	1.07	2.5	0.015	99.77	5.45003	36.725	1.12864	99.77	5.45003	19.1	1.02944		35	1.07	2.5	0.01	99.77	4.89466	20.275	1.07392	99.77	4.89466	19.1	1.04263
35	1.05	2.5	0.02	99.77	5.92595	99.75	5.75382	20.275	1.01611		30	1.06	2.5	0.015	99.75	5.29421	37.9	1.13142	99.75	5.29421	20.275	1.0311		30	1.06	2.5	0.01	99.75	4.7568	21.45	1.0761	99.75	4.7568	20.275	1.04503
30	1.04	2.5	0.02	99.75	5.75382	99.73	5.59927	21.45	1.01709		25	1.04	2.5	0.015	99.73	5.1543	39.075	1.13424	99.73	5.1543	21.45	1.03278		25	1.05	2.5	0.01	99.73	4.63295	22.625	1.07827	99.73	4.63295	21.45	1.04743
25	1.03	2.5	0.02	99.73	5.59927	99.71	5.4594	22.625	1.01794		20	1.03	2.5	0.015	99.71	5.02767	40.25	1.1371	99.71	5.02767	22.625	1.03448		20	1.04	2.5	0.01	99.71	4.5208	23.8	1.08043	99.71	4.5208	22.625	1.04986
20	1.02	2.5	0.02	99.71	5.4594	99.69	5.33194	23.8	1.0188		15	1.02	2.5	0.015	99.69	4.91227	41.425	1.14001	99.69	4.91227	23.8	1.0362		15	1.03	2.5	0.01	99.69	4.41855	24.975	1.08259	99.69	4.41855	23.8	1.0523
15	1	2.5	0.02	99.69	5.33194	99.67	5.2151	24.975	1.01982						99.67	4.80649	42.6	1.14296	99.67	4.80649	24.975	1.03795						99.67	4.32476	26.15	1.08476	99.67	4.32476	24.975	1.05476
10	1	2.5	0.02	99.67	5.2151	99.65	5.10743	26.15	1.02072						99.65	4.709	43.775	1.14597	99.65	4.709	26.15	1.03974						99.65	4.23829	27.325	1.08692	99.65	4.23829	26.15	1.05725
				99.65	5.10743	99.63	5.00776	27.325	1.02164						99.63	4.61874	44.95	1.14904	99.63	4.61874	27.325	1.04147						99.63	4.15819	28.5	1.0891	99.63	4.15819	27.325	1.05977
				99.63	5.00776	99.61	4.91509	28.5	1.02258						99.61	4.53483	46.125	1.15218	99.61	4.53483	28.5	1.04332						99.61	4.08369	29.675	1.09129	99.61	4.08369	28.5	1.06232
				99.61	4.91509	99.59	4.82863	29.675	1.02355						99.59	4.45654	47.3	1.15538	99.59	4.45654	29.675	1.04513						99.59	4.01413	30.85	1.09349	99.59	4.01413	29.675	1.06491
				99.59	4.82863	99.57	4.74769	30.85	1.02454						99.57	4.38323	48.475	1.15865	99.57	4.38323	30.85	1.04699						99.57	3.94898	32.025	1.0957	99.57	3.94898	30.85	1.06753
				99.57	4.74769	99.55	4.67167	32.025	1.02556						99.55	4.31439	49.65	1.16201	99.55	4.31439	32.025	1.0489						99.55	3.88777	33.2	1.09794	99.55	3.88777	32.025	1.07019
				99.55	4.67167	99.53	4.6001	33.2	1.02661						99.53	4.24956	50.825	1.16544	99.53	4.24956	33.2	1.05077						99.53	3.8301	34.375	1.1002	99.53	3.8301	33.2	1.0729
				99.53	4.6001	99.51	4.53253	34.375	1.02769						99.51	4.18835	52	1.16898	99.51	4.18835	34.375	1.05279						99.51	3.77562	35.55	1.10249	99.51	3.77562	34.375	1.07567
				99.51	4.53253	99.49	4.46859	35.55	1.02867						99.49	4.13043	53.175	1.17261	99.49	4.13043	35.55	1.05478						99.49	3.72405	36.725	1.1048	99.49	3.72405	35.55	1.07849
				99.49	4.46859	99.39	4.19331	36.725	1.02983						99.39	3.88103	54.35	1.17635	99.39	3.88103	36.725	1.05676						99.39	3.50169	37.9	1.10714	99.39	3.50169	36.725	1.08137
				99.39	4.19331	99.29	3.97336	37.9	1.03103						99.29	3.68168	55.525	1.1802	99.29	3.68168	37.9	1.0589						99.29	3.32357	39.075	1.10952	99.29	3.32357	37.9	1.0843
				99.29	3.97336	99.19	3.79202	39.075	1.03213						99.19	3.51726	56.7	1.18418	99.19	3.51726	39.075	1.06103						99.19	3.17637	40.25	1.11193	99.19	3.17637	39.075	1.08732
				99.19	3.79202	99.09	3.63897	40.25	1.03329						99.09	3.37844	57.875	1.1883	99.09	3.37844	40.25	1.06325						99.09	3.05184	41.425	1.11438	99.09	3.05184	40.25	1.0904
				99.09	3.63897	99	3.51975	41.425	1.03449						99	3.27026	59.05	1.19256	99	3.27026	41.425	1.06556						99	2.95464	42.6	1.11687	99	2.95464	41.425	1.09356
				99	3.51975	98.75	3.25414	42.6	1.03589						98.75	3.02906	60.225	1.19699	98.75	3.02906	42.6	1.06788						98.75	2.73734	43.775	1.11941	98.75	2.73734	42.6	1.09682
				98.75	3.25414	98.5	3.05373	43.775	1.03708						98.5	2.84685	61.4	1.20158	98.5	2.84685	43.775	1.07032						98.5	2.5726	44.95	1.122	98.5	2.5726	43.775	1.10017
				98.5	3.05373	98.25	2.89555	44.95	1.03847						98.25	2.70284	62.575	1.20637	98.25	2.70284	44.95	1.07278						98.25	2.44205	46.125	1.12464	98.25	2.44205	44.95	1.10362
				98.25	2.89555	98	2.76665	46.125	1.03993						98	2.58533	63.75	1.21137	98	2.58533	46.125	1.07537						98	2.33532	47.3	1.12734	98	2.33532	46.125	1.10717
				98	2.76665	97.5	2.56767	47.3	1.04133						97.5	2.40359	64.925	1.21659	97.5	2.40359	47.3	1.07802						97.5	2.16999	48.475	1.1301	97.5	2.16999	47.3	1.11085
				97.5	2.56767	97	2.4199	48.475	1.04282						97	2.26828	66.1	1.22207	97	2.26828	48.475	1.08073						97	2.04689	49.65	1.13292	97	2.04689	48.475	1.11467
				97	2.4199	96.5	2.30498	49.65	1.0444						96.5	2.1628	67.275	1.22782	96.5	2.1628	49.65	1.08361						96.5	1.95113	50.825	1.13581	96.5	1.95113	49.65	1.11863
				96.5	2.30498	96	2.21256	50.825	1.04609						96	2.0778	68.45	1.23388	96	2.0778	50.825	1.08666						96	1.87423	52	1.13878	96	1.87423	50.825	1.12274
				96	2.21256	95.5	2.1363	52	1.04788						95.5	2.00754	69.625	1.24028	95.5	2.00754	52	1.08974						95.5	1.81094	53.175	1.14183	95.5	1.81094	52	1.12702
				95.5	2.1363	95	2.07207	53.175	1.04966						95	1.94828	70.8	1.24706	95	1.94828	53.175	1.09304						95	1.75782	54.35	1.14496	95	1.75782	53.175	1.1315
				95	2.07207	94.5	2.01706	54.35	1.05159						94.5	1.89745	71.975	1.25426	94.5	1.89745	54.35	1.09642						94.5	1.71251	55.525	1.14819	94.5	1.71251	54.35	1.13618
				94.5	2.01706	94	1.96929	55.525	1.05353						94	1.85326	73.15	1.26195	94	1.85326	55.525	1.10006						94	1.67333	56.7	1.15151	94	1.67333	55.525	1.14109
				94	1.96929	93.5	1.9273	56.7	1.05564						93.5	1.81439	74.325	1.27017	93.5	1.81439	56.7	1.10384						93.5	1.63904	57.875	1.15494	93.5	1.63904	56.7	1.14626
				93.5	1.9273	93	1.89003	57.875	1.05794						93	1.77986	75.5	1.27902	93	1.77986	57.875	1.10787						93	1.60874	59.05	1.15848	93	1.60874	57.875	1.15173
				93	1.89003	92.5	1.85664	59.05	1.06033						92.5	1.7489	76.675	1.28858	92.5	1.7489	59.05	1.11212						92.5	1.58171	60.225	1.16215	92.5	1.58171	59.05	1.15751
				92.5	1.85664	92	1.82652	60.225	1.06283						92	1.72094	77.85	1.29897	92	1.72094	60.225	1.11664						92	1.55156	61.4	1.16596	92	1.55156	60.225	1.16215
				92	1.82652	91.5	1.79914	61.4	1.06561						91.5	1.69043	79.025	1.31031	91.5	1.69043	61.4	1.12156						91.5	1.52496	62.575	1.1699	91.5	1.52496	61.4	1.16596
				91.5	1.79914	91	1.77411	62.575	1.0686						91	1.65871	80.2	1.32278	91	1.65871	62.575	1.12681						91	1.50162	63.75	1.17401	91	1.50162	62.575	1.1699
				91	1.77411	90.5	1.75111	63.75	1.07183						90.5	1.63066	81.375	1.33659	90.5	1.63066	63.75	1.13248						90.5	1.48092	64.925	1.17828	90.5	1.48092	63.75	1.17401
				90.5	1.75111	90	1.72987	64.925	1.07539						90	1.60563	82.55	1.35201	90	1.60563	64.925	1.13868						90	1.46239	66.1	1.18275	90	1.46239	64.925	1.17828
				90	1.72987	89.5	1.70902	66.1	1.07936						89.5	1.58312	83.725	1.36939	89.5	1.58312	66.1	1.14549						89.5	1.44568	67.275	1.18741	89.5	1.44568	66.1	1.18275
				89.5	1.70902	89	1.68434	67.275	1.08362						89	1.56273	84.9	1.38919	89	1.56273	67.275	1.15304						89	1.43049	68.45	1.19231	89	1.43049	67.275	1.18741
				89	1.68434	88.5	1.66186	68.45	1.08857						88.5	1.54415	86.075	1.41202	88.5	1.54415	68.45	1.16151						88.5	1.41661	69.625	1.19745	88.5	1.41661	68.45	1.19231
				88.5	1.66186	88	1.64126	69.625	1.09419						88	1.52711	87.25	1.43871	88	1.52711	69.625	1.17114						88	1.40386	70.8	1.20286	88	1.40386	69.625	1.19745
				88	1.64126	87.5	1.6223	70.8	1.1008						87.5	1.51142	88.425	1.47043	87.5	1.51142	70.8	1.18228						87.5	1.39207	71.975	1.20858	87.5	1.39207	70.8	1.20286
				87.5	1.6223	87	1.60476	71.975	1.10855						87	1.4969	89.6	1.50881	87	1.4969	71.975	1.19547						87	1.38113	73.15	1.21464	87	1.38113	71.975	1.20858
				87	1.60476	86.5	1.58847	73.15	1.11823						86.5	1.4834	90.775	1.55624	86.5	1.4834	73.15	1.21154						86.5	1.37094	74.325	1.22107	86.5	1.37094	73.15	1.21464
				86.5	1.58847	86	1.57328	74.325	1.13057						86	1.4708	91.95	1.61628	86	1.4708	74.325	1.232						86	1.3614	75.5	1.22794	86	1.3614	74.325	1.22107
				86	1.57328	85.5	1.55906	75.5	1.14767						85.5	1.45901	93.125	1.69436	85.5	1.45901	75.5	1.25985						85.5	1.35245	76.675	1.23529	85.5	1.35245	75.5	1.22794
				85.5	1.55906	85	1.54572	76.675	1.17421						85	1.44793	94.3	1.79916	85	1.44793	76.675	1.28858						85	1.34403	77.85	1.2432	85	1.34403	76.675	1.23529
				85	1.54572	84.5	1.53315	77.85	1.22845						84.5	1.43749	95.475	1.94567	84.5	1.43749	77.85	1.29897						84.5	1.33608	79.025	1.25176	84.5	1.33608	77.85	1.2432
				84.5	1.53315	84	1.52129	79.025	1.39438						84	1.42763	96.65	2.16357	84	1.42763	79.025	1.31031						84	1.32855	80.2	1.26105	84	1.32855	79.025	1.25176
				84	1.52129	83.5	1.51006	80.2	1.41041						83.5	1.41829	97.825	2.52768	83.5	1.41829	80.2	1.32278						83.5	1.3214	81.375	1.27123	83.5	1.3214	80.2	1.26105
				83.5	1.51006	83	1.4994	81.375	1.42803						83	1.40942	99	3.34319	83	1.40942	81.375	1.33659						83	1.31461	82.55	1.28244	83	1.31461	81.375	1.27123
				83	1.4994	82.5	1.48927	82.55	1.44753						82.5	1.40099		--	82.5	1.40099	82.55	1.35201						82.5	1.30814	83.725	1.29492	82.5	1.30814	82.55	1.28244
				82.5	1.48927	82	1.47961	83.725	1.46929						82	1.39295		--	82	1.39295	83.725	1.36939						82	1.30196	84.9	1.30892	82	1.30196	83.725	1.29492
				82	1.47961	81.5	1.4704	84.9	1.4938						81.5	1.38527		--	81.5	1.38527	84.9	1.38919						81.5	1.29604	86.075	1.32484	81.5	1.29604	84.9	1.30892
				81.5	1.4704	81	1.46158	86.075	1.52168						81	1.37793		--	81	1.37793	86.075	1.41202						81	1.29038	87.25	1.3432	81	1.29038	86.075	1.32484
				81	1.46158	80.5	1.45314	87.25	1.55376						80.5	1.37089		--	80.5	1.37089	87.25	1.43871						80.5	1.28494	88.425	1.36475	80.5	1.28494	87.25	1.3432
				80.5	1.45314	80	1.44504	88.425	1.59121						80	1.36413		--	80	1.36413	88.425	1.47043						80	1.27972	89.6	1.3906	80	1.27972	88.425	1.36475
				80	1.44504	79.5	1.0726	89.6	1.63558						79.5	1.35764		--	79.5	1.35764	89.6	1.50881						79.5	1.27469	90.775	1.42249	79.5	1.27469	89.6	1.3906
				79.5	1.43725	79	1.06991	90.775	1.68915						79	1.35139		--	79	1.12708	90.775	1.55624						79	1.26984	91.95	1.46328	79	1.17521	90.775	1.42249
				79	1.42977	78.5	1.06753	91.95	1.75525						78.5	1.34536		--	78.5	1.12296	91.95	1.61628						78.5	1.26517	93.125	1.518	78.5	1.16972	91.95	1.46328
				78.5	1.42255	78	1.06539	93.125	1.83908						78	1.33955		--	78	1.11925	93.125	1.69436						78	1.26065	94.3	1.59607	78	1.16478	93.125	1.518
				78	1.41559	77.5	1.06346	94.3	1.94916						77.5	1.33393		--	77.5	1.11587	94.3	1.79916						77.5	1.25629	95.475	1.71609	77.5	1.16028	94.3	1.59607
				77.5	1.40887	77	1.06169	95.475	2.10074						77	1.32851		--	77	1.11278	95.475	1.94567						77	1.25206	96.65	1.91499	77	1.15615	95.475	1.71609
				77	1.40237	76.5	1.06005	96.65	2.32507						76.5	1.32325		--	76.5	1.10992	96.65	2.16357						76.5	1.24797	97.825	2.27019	76.5	1.15233	96.65	1.91499
				76.5	1.39608	76	1.05854	97.825	2.70235						76	1.31816			76	1.10726	97.825	2.52768						76	1.244	99	3.05889	76	1.14877	97.825	2.27019
				76	1.38998	75.5	1.05713	99	3.5614						75.5	1.31322			75.5	1.10478	99	3.34319						75.5	1.24014		--	75.5	1.14544	99	3.05889
				75.5	1.38407	75	1.0558		--						75	1.30842			75	1.10245								75	1.2364		--	75	1.1423
				75	1.37833	74.5	1.05456		--						74.5	1.30376			74.5	1.10025								74.5	1.23276		--	74.5	1.13935
				74.5	1.37276	74	1.05338		--						74	1.29923			74	1.09817								74	1.22922		--	74	1.13655
				74	1.36734	73.5	1.05226		--						73.5	1.29482			73.5	1.0962								73.5	1.22577		--	73.5	1.13388
				73.5	1.36207	73	1.0512		--						73	1.29053			73	1.09431								73	1.22241		--	73	1.13135
				73	1.35694	72.5	1.05019		--						72.5	1.28635			72.5	1.09252								72.5	1.21913		--	72.5	1.12892
				72.5	1.35194	72	1.04922		--						72	1.28227			72	1.0908								72	1.21594		--	72	1.1266
				72	1.34706	71.5	1.0483		--						71.5	1.27829			71.5	1.08915								71.5	1.21282		--	71.5	1.12437
				71.5	1.3423	71	1.0474		--						71	1.2744			71	1.08757								71	1.20977		--	71	1.12222
				71	1.33765	70.5	1.04655		--						70.5	1.2706			70.5	1.08605								70.5	1.20679		--	70.5	1.12015
				70.5	1.33311	70	1.04573		--						70	1.26689			70	1.08458								70	1.20388		--	70	1.11816
				70	1.32867	69.5	1.04493		--						69.5	1.26326			69.5	1.08316								69.5	1.20103			69.5	1.11623
				69.5	1.32433	69	1.04416		--						69	1.25971			69	1.08178								69	1.19824			69	1.11436
				69	1.32008	68.5	1.04342		--						68.5	1.25623			68.5	1.08045								68.5	1.19551			68.5	1.11255
				68.5	1.31592	68	1.0427		--						68	1.25282			68	1.07916	--	--						68	1.19283			68	1.1108
				68	1.31185	67.5	1.042		--						67.5	1.24948			67.5	1.07791	--	--						67.5	1.19021			67.5	1.10909
				67.5	1.30785	67	1.04133		--						67	1.24621			67	1.07669	--	--						67	1.18764			67	1.10743
				67	1.30393	66.5	1.04067		--						66.5	1.24299			66.5	1.07551	--	--						66.5	1.18511			66.5	1.10581
				66.5	1.30009	66	1.04003		--						66	1.23984			66	1.07435	--	--						66	1.18263			66	1.10424
				66	1.29631	65.5	1.0394		--						65.5	1.23675			65.5	1.07323	--	--						65.5	1.1802			65.5	1.1027
				65.5	1.29261	65	1.03879		--						65	1.2337			65	1.07213	--	--						65	1.17781			65	1.1012
				65	1.28897	64.5	1.0382		--						64.5	1.23072			64.5	1.07106	--	--						64.5	1.17547			64.5	1.09974
				64.5	1.28539	64	1.03762		--						64	1.22778			64	1.07002	--	--						64	1.17316			64	1.09831
				64	1.28187	63.5	1.03706		--						63.5	1.22489			63.5	1.069	--	--						63.5	1.17089			63.5	1.09691
				63.5	1.27841	63	1.0365		--						63	1.22205			63	1.068	--	--						63	1.16866			63	1.09553
				63	1.275	62.5	1.03596		--						62.5	1.21926			62.5	1.06702	--	--						62.5	1.16647			62.5	1.09419
				62.5	1.27165	62	1.03543		--						62	1.2165			62	1.06606	--	--						62	1.1643			62	1.09288
				62	1.26835	61.5	1.03492		--						61.5	1.21379			61.5	1.06512	--	--						61.5	1.16218			61.5	1.09159
				61.5	1.2651	61	1.03441		--						61	1.21112			61	1.0642	--	--						61	1.16008			61	1.09032
				61	1.2619	60.5	1.03391		--						60.5	1.20849			60.5	1.06329	--	--						60.5	1.15802			60.5	1.08908
				60.5	1.25874	60	1.03342		--						60	1.2059			60	1.06241	--	--						60	1.15599			60	1.08786
				60	1.25562	59.5	1.03294		--						59.5	1.20334			59.5	1.06154	--	--						59.5	1.15398			59.5	1.08666
				59.5	1.25255	59	1.03247		--						59	1.20082			59	1.06068	--	--						59	1.15201			59	1.08548
				59	1.24952	58.5	1.03201		--						58.5	1.19833			58.5	1.05984	--	--						58.5	1.15006			58.5	1.08432
				58.5	1.24653	58	1.03156		--						58	1.19588			58	1.05902	--	--						58	1.14814			58	1.08318
				58	1.24357	57.5	1.03111		--						57.5	1.19346			57.5	1.0582	--	--						57.5	1.14624			57.5	1.08206
				57.5	1.24066	57	1.03068		--						57	1.19106			57	1.0574	--	--						57	1.14437			57	1.08096
				57	1.23777	56.5	1.03024		--						56.5	1.1887			56.5	1.05662	--	--						56.5	1.14252			56.5	1.07987
				56.5	1.23493	56	1.02982		--						56	1.18636			56	1.05584	--	--						56	1.1407			56	1.0788
				56	1.23211	55.5	1.0294		--						55.5	1.18406			55.5	1.05508	--	--						55.5	1.1389			55.5	1.07774
				55.5	1.22933	55	1.02899		--						55	1.18178			55	1.05433	--	--						55	1.13712			55	1.0767
				55	1.22657	54.5	1.02859		--						54.5	1.17952			54.5	1.05359	--	--						54.5	1.13537			54.5	1.07568
				54.5	1.22385	54	1.02819		--						54	1.17729			54	1.05286	--	--						54	1.13363			54	1.07467
				54	1.22116	53.5	1.0278		--						53.5	1.17509			53.5	1.05214	--	--						53.5	1.13191			53.5	1.07367
				53.5	1.21849	53	1.02741		--						53	1.17291			53	1.05143	--	--						53	1.13022			53	1.07268
				53	1.21585	52.5	1.02703		--						52.5	1.17075			52.5	1.05072	--	--						52.5	1.12854			52.5	1.07171
				52.5	1.21323	52	1.02665		--						52	1.16861			52	1.05003	--	--						52	1.12688			52	1.07075
				52	1.21064	51.5	1.02628		--						51.5	1.1665			51.5	1.04935	--	--						51.5	1.12524			51.5	1.06981
				51.5	1.20808	51	1.02591		--						51	1.1644			51	1.04868	--	--						51	1.12362			51	1.06887
				51	1.20554	50.5	1.02555		--						50.5	1.16233			50.5	1.04801	--	--						50.5	1.12201			50.5	1.06795
				50.5	1.20301	50	1.02519		--						50	1.16027			50	1.04735	--	--						50	1.12042			50	1.06703
				50	1.20052	49.5	1.02484		--						49.5	1.15824			49.5	1.0467	--	--						49.5	1.11885			49.5	1.06613
				49.5	1.19804	49	1.02449		--						49	1.15622			49	1.04606	--	--						49	1.11729			49	1.06524
				49	1.19558	48.5	1.02415		--						48.5	1.15422			48.5	1.04543	--	--						48.5	1.11575			48.5	1.06435
				48.5	1.19314	48	1.02381		--						48	1.15224			48	1.0448	--	--						48	1.11422			48	1.06348
				48	1.19072	47.5	1.02347		--						47.5	1.15027			47.5	1.04418	--	--						47.5	1.11271			47.5	1.06262
				47.5	1.18832	47	1.02314		--						47	1.14832			47	1.04357	--	--						47	1.11121			47	1.06176
				47	1.18594	46.5	1.02281		--						46.5	1.14638			46.5	1.04296	--	--						46.5	1.10973			46.5	1.06092
				46.5	1.18357	46	1.02249		--						46	1.14447			46	1.04236	--	--						46	1.10826			46	1.06008
				46	1.18122	45.5	1.02217		--						45.5	1.14256			45.5	1.04177	--	--						45.5	1.1068			45.5	1.05925
				45.5	1.17889	45	1.02185		--						45	1.14067			45	1.04118	--	--						45	1.10536			45	1.05843
				45	1.17657	44.5	1.02153		--						44.5	1.13879			44.5	1.0406	--	--						44.5	1.10392			44.5	1.05762
				44.5	1.17426	44	1.02122		--						44	1.13693			44	1.04002	--	--						44	1.1025			44	1.05681
				44	1.17197	43.5	1.02091		--						43.5	1.13508			43.5	1.03945	--	--						43.5	1.10109			43.5	1.05601
				43.5	1.16969	43	1.02061		--						43	1.13324			43	1.03888	--	--						43	1.0997			43	1.05522
				43	1.16743	42.5	1.02031		--						42.5	1.13142			42.5	1.03832	--	--						42.5	1.09831			42.5	1.05444
				42.5	1.16518	42	1.02001		--						42	1.1296			42	1.03777	--	--						42	1.09694			42	1.05366
				42	1.16294	41.5	1.01971		--						41.5	1.1278			41.5	1.03722	--	--						41.5	1.09557			41.5	1.05289
				41.5	1.16071	41	1.01942		--						41	1.12601			41	1.03668	--	--						41	1.09422			41	1.05213
				41	1.1585	40.5	1.01913		--						40.5	1.12423			40.5	1.03614	--	--						40.5	1.09288			40.5	1.05137
				40.5	1.15629	40	1.01884		--						40	1.12246			40	1.0356	--	--						40	1.09154			40	1.05062
				40	1.1541	39.5	1.01856		--						39.5	1.1207			39.5	1.03507	--	--						39.5	1.09022			39.5	1.04988
				39.5	1.15191	39	1.01827		--						39	1.11895			39	1.03454	--	--						39	1.08891			39	1.04914
				39	1.14974	38.5	1.01799		--						38.5	1.11721			38.5	1.03402	--	--						38.5	1.0876			38.5	1.04841
				38.5	1.14757	38	1.01771		--						38	1.11548			38	1.0335	--	--						38	1.08631			38	1.04768
				38	1.14542	37.5	1.01744		--						37.5	1.11376			37.5	1.03299	--	--						37.5	1.08502			37.5	1.04696
				37.5	1.14327	37	1.01716		--						37	1.11205			37	1.03248	--	--						37	1.08374			37	1.04624
				37	1.14113	36.5	1.01689		--						36.5	1.11035			36.5	1.03197	--	--						36.5	1.08248			36.5	1.04553
				36.5	1.13901	36	1.01662		--						36	1.10865			36	1.03147	--	--						36	1.08122			36	1.04482
				36	1.13689	35.5	1.01636		--						35.5	1.10697			35.5	1.03097	--	--						35.5	1.07996			35.5	1.04412
				35.5	1.13478	35	1.01609		--						35	1.10529			35	1.03048	--	--						35	1.07872			35	1.04342
				35	1.13268	34.5	1.01583		--						34.5	1.10363			34.5	1.02998	--	--						34.5	1.07749			34.5	1.04273
				34.5	1.13059	34	1.01557		--						34	1.0295			34	1.0295	--	--						34	1.04204			34	1.04204
				34	1.01557	33.5	1.01531		--						33.5	1.02901			33.5	1.02901	--	--						33.5	1.04136			33.5	1.04136
				33.5	1.01531	33	1.01505		--						33	1.02853			33	1.02853	--	--						33	1.04068			33	1.04068
				33	1.01505	32.5	1.01479		--						32.5	1.02805			32.5	1.02805	--	--						32.5	1.04001			32.5	1.04001
				32.5	1.01479	32	1.01454		--						32	1.02758			32	1.02758	--	--						32	1.03934			32	1.03934
				32	1.01454	31.5	1.01429		--						31.5	1.0271			31.5	1.0271	--	--						31.5	1.03867			31.5	1.03867
				31.5	1.01429	31	1.01404		--						31	1.02663			31	1.02663	--	--						31	1.03801			31	1.03801
				31	1.01404	30.5	1.01379		--						30.5	1.02617			30.5	1.02617	--	--						30.5	1.03735			30.5	1.03735
				30.5	1.01379	30	1.01354		--						30	1.0257			30	1.0257	--	--						30	1.03669			30	1.03669
				30	1.01354	29.5	1.0133		--						29.5	1.02524			29.5	1.02524	--	--						29.5	1.03604			29.5	1.03604
				29.5	1.0133	29	1.01305		--						29	1.02478			29	1.02478	--	--						29	1.03539			29	1.03539
				29	1.01305	28.5	1.01281		--						28.5	1.02433			28.5	1.02433	--	--						28.5	1.03475			28.5	1.03475
				28.5	1.01281	28	1.01257		--						28	1.02387			28	1.02387	--	--						28	1.0341			28	1.0341
				28	1.01257	27.5	1.01233		--						27.5	1.02342			27.5	1.02342	--	--						27.5	1.03347			27.5	1.03347
				27.5	1.01233	27	1.01209		--						27	1.02297			27	1.02297	--	--						27	1.03283			27	1.03283
				27	1.01209	26.5	1.01185		--						26.5	1.02252			26.5	1.02252	--	--						26.5	1.0322			26.5	1.0322
				26.5	1.01185	26	1.01161		--						26	1.02208			26	1.02208	--	--						26	1.03157			26	1.03157
				26	1.01161	25.5	1.01138		--						25.5	1.02164			25.5	1.02164	--	--						25.5	1.03094			25.5	1.03094
				25.5	1.01138	25	1.01114		--						25	1.0212			25	1.0212	--	--						25	1.03031			25	1.03031
				25	1.01114	24.5	1.01091		--						24.5	1.02076			24.5	1.02076	--	--						24.5	1.02969			24.5	1.02969
				24.5	1.01091	24	1.01068		--						24	1.02032			24	1.02032	--	--						24	1.02907			24	1.02907
				24	1.01068	23.5	1.01045		--						23.5	1.01988			23.5	1.01988	--	--						23.5	1.02845			23.5	1.02845
				23.5	1.01045	23	1.01022		--						23	1.01945			23	1.01945	--	--						23	1.02784			23	1.02784
				23	1.01022	22.5	1.00999		--						22.5	1.01902			22.5	1.01902	--	--						22.5	1.02722			22.5	1.02722
				22.5	1.00999	22	1.00976		--						22	1.01859			22	1.01859	--	--						22	1.02661			22	1.02661
				22	1.00976	21.5	1.00953		--						21.5	1.01816			21.5	1.01816	--	--						21.5	1.026			21.5	1.026
				21.5	1.00953	21	1.00931		--						21	1.01773			21	1.01773	--	--						21	1.0254			21	1.0254
				21	1.00931	20.5	1.00908		--						20.5	1.0173			20.5	1.0173	--	--						20.5	1.02479			20.5	1.02479
				20.5	1.00908	20	1.00886		--						20	1.01688			20	1.01688	--	--						20	1.02418			20	1.02418
				20	1.00886	19.5	1.00863		--						19.5	1.01646			19.5	1.01646	--	--						19.5	1.02358			19.5	1.02358
				19.5	1.00863	19	1.00841		--						19	1.01603			19	1.01603	--	--						19	1.02298			19	1.02298
				19	1.00841	18.5	1.00819		--						18.5	1.01561			18.5	1.01561	--	--						18.5	1.02238			18.5	1.02238
				18.5	1.00819	18	1.00797		--						18	1.01519			18	1.01519	--	--						18	1.02178			18	1.02178
				18	1.00797	17.5	1.00774		--						17.5	1.01477			17.5	1.01477	--	--						17.5	1.02119			17.5	1.02119
				17.5	1.00774	17	1.00752		--						17	1.01435			17	1.01435	--	--						17	1.02059			17	1.02059
				17	1.00752	16.5	1.0073		--						16.5	1.01394			16.5	1.01394	--	--						16.5	1.01999			16.5	1.01999
				16.5	1.0073	16	1.00708		--						16	1.01352			16	1.01352	--	--						16	1.0194			16	1.0194
				16	1.00708	15.5	1.00686		--						15.5	1.0131			15.5	1.0131	--	--						15.5	1.01881			15.5	1.01881
				15.5	1.00686	15	1.00664		--						15	1.01269			15	1.01269	--	--						15	1.01821			15	1.01821
				15	1.00664	14.5	1.00643		--						14.5	1.01227			14.5	1.01227	--	--						14.5	1.01762			14.5	1.01762
				14.5	1.00643	14	1.00621		--						14	1.01186			14	1.01186	--	--						14	1.01703			14	1.01703
				14	1.00621	13.5	1.00599		--						13.5	1.01144			13.5	1.01144	--	--						13.5	1.01644			13.5	1.01644
				13.5	1.00599	13	1.00577		--						13	1.01103			13	1.01103	--	--						13	1.01584			13	1.01584
				13	1.00577	12.5	1.00555		--						12.5	1.01062			12.5	1.01062	--	--						12.5	1.01525			12.5	1.01525
				0.5	1.00024	12	1.00534		--						12	1.0102			12	1.0102	--	--						12	1.01466			12	1.01466
				0.1	1.00005	11.5	1.00512		--						11.5	1.00979			11.5	1.00979	--	--						11.5	1.01407			11.5	1.01407
						11	1.0049		--						11	1.00938			11	1.00938	--	--						11	1.01347			11	1.01347
						10.5	1.00468		--						10.5	1.00896			10.5	1.00896	--	--						10.5	1.01288			10.5	1.01288
						10	1.00447		--						10	1.00855			10	1.00855	--	--						10	1.01229			10	1.01229
						9.5	1.00425		--						9.5	1.00813			9.5	1.00813	--	--						9.5	1.0117			9.5	1.0117
						9	1.00403		--						9	1.00772			9	1.00772	--	--						9	1.0111			9	1.0111
						8.5	1.00381		--						8.5	1.0073			8.5	1.0073	--	--						8.5	1.0105			8.5	1.0105
						8	1.0036		--						8	1.00689			8	1.00689	--	--						8	1.00991			8	1.00991
						7.5	1.00338		--						7.5	1.00647			7.5	1.00647	--	--						7.5	1.00931			7.5	1.00931
						7	1.00316		--						7	1.00605			7	1.00605	--	--						7	1.00871			7	1.00871
						6.5	1.00294		--						6.5	1.00563			6.5	1.00563	--	--						6.5	1.00811			6.5	1.00811
						6	1.00272		--						6	1.00521			6	1.00521	--	--						6	1.0075			6	1.0075
						5.5	1.0025		--						5.5	1.00479			5.5	1.00479	--	--						5.5	1.0069			5.5	1.0069
						5	1.00228		--						5	1.00436			5	1.00436	--	--						5	1.00629			5	1.00629
						4.5	1.00205		--						4.5	1.00394			4.5	1.00394	--	--						4.5	1.00568			4.5	1.00568
						4	1.00183		--						4	1.00351			4	1.00351	--	--						4	1.00506			4	1.00506
						3.5	1.00161		--						3.5	1.00308			3.5	1.00308	--	--						3.5	1.00444			3.5	1.00444
						3	1.00138		--						3	1.00265			3	1.00265	--	--						3	1.00382			3	1.00382
						2.5	1.00116		--						2.5	1.00222			2.5	1.00222	--	--						2.5	1.0032			2.5	1.0032
						2	1.00093		--						2	1.00178			2	1.00178	--	--						2	1.00257			2	1.00257
						1.5	1.0007		--						1.5	1.00134			1.5	1.00134	--	--						1.5	1.00193			1.5	1.00193
						1	1.00047		--						1	1.0009			1	1.0009	--	--						1	1.00129			1	1.00129
						0.5	1.00024		--						0.5	1.00045			0.5	1.00045	--	--						0.5	1.00065			0.5	1.00065
						0.1	1.00005		--						0.1	1.00009			0.1	1.00009	--	--						0.1	1.00013			0.1	1.00013
									--						--	--			--	--	--	--						--	--			--	--
									--										42	1.0378	--	--										--	--
									--										41.75	1.0375	--	--										41	1.0521
									--										41.5	1.0372	--	--										40.75	1.0518
									--										41.25	1.0369	--	--										40.5	1.0514
									--										41	1.0367	--	--										40.25	1.051
									--										40.75	1.0364	--	--										40	1.0506
									--										40.5	1.0361	--	--										39.75	1.0503
									--										40.25	1.0359	--	--										39.5	1.0499
									--										40	1.0356	--	--										39.25	1.0495
									--										39.75	1.0353	--	--										39	1.0491
									--										39.5	1.0351	--	--										38.75	1.0488
									--										39.25	1.0348	--	--										38.5	1.0484
									--										39	1.0345	--	--										38.25	1.048
									--										38.75	1.0343	--	--										38	1.0477
									--										38.5	1.034	--	--										37.75	1.0473
									--										38.25	1.0338	--	--										37.5	1.047
									--										38	1.0335	--	--										37.25	1.0466
									--										37.75	1.0332	--	--										37	1.0462
									--										37.5	1.033	--	--										36.75	1.0459
									--										37.25	1.0327	--	--										36.5	1.0455
									--										37	1.0325	--	--										36.25	1.0452
									--										36.75	1.0322	--	--										36	1.0448
									--										36.5	1.032	--	--										35.75	1.0445
									--										36.25	1.0317	--	--										35.5	1.0441
									--										36	1.0315	--	--										35.25	1.0438
									--										35.75	1.0312	--	--										35	1.0434
									--										35.5	1.031	--	--										34.75	1.0431
									--										35.25	1.0307	--	--										34.5	1.0427
									--										35	1.0305	--	--										34.25	1.0424
									--										34.75	1.0302	--	--										34	1.042
									--										34.5	1.03	--	--										33.75	1.0417
									--										34.25	1.0297	--	--										33.5	1.0414
									--										34	1.0295	--	--										33.25	1.041
									--										33.75	1.0293	--	--										33	1.0407
									--										33.5	1.029	--	--										32.75	1.0403
									--										33.25	1.0288	--	--										32.5	1.04
									--										33	1.0285	--	--										32.25	1.0397
									--										32.75	1.0283	--	--										32	1.0393
									--										32.5	1.0281	--	--										31.75	1.039
									--										32.25	1.0278	--	--										31.5	1.0387
									--										32	1.0276	--	--										31.25	1.0383
									--										31.75	1.0273	--	--										31	1.038
									--										31.5	1.0271	--	--										30.75	1.0377
									--										31.25	1.0269	--	--										30.5	1.0374
									--										31	1.0266	--	--										30.25	1.037
									--										30.75	1.0264	--	--										30	1.0367
									--										30.5	1.0262	--	--										29.75	1.0364
									--										30.25	1.0259	--	--										29.5	1.036
									--										30	1.0257	--	--										29.25	1.0357
									--										29.75	1.0255	--	--										29	1.0354
									--										29.5	1.0252	--	--										28.75	1.0351
									--										29.25	1.025	--	--										28.5	1.0348
									--										29	1.0248	--	--										28.25	1.0344
									--										28.75	1.0246	--	--										28	1.0341
									--										28.5	1.0243	--	--										27.75	1.0338
									--										28.25	1.0241	--	--										27.5	1.0335
									--										28	1.0239	--	--										27.25	1.0332
									--										27.75	1.0236	--	--										27	1.0328
									--										27.5	1.0234	--	--										26.75	1.0325
									--										27.25	1.0232	--	--										26.5	1.0322
									--										27	1.023	--	--										26.25	1.0319
									--										26.75	1.0227	--	--										26	1.0316
									--										26.5	1.0225	--	--										25.75	1.0313
									--										26.25	1.0223	--	--										25.5	1.0309
									--										26	1.0221	--	--										25.25	1.0306
									--										25.75	1.0219	--	--										25	1.0303
									--										25.5	1.0216	--	--										24.75	1.03
									--										25.25	1.0214	--	--										24.5	1.0297
									--										25	1.0212	--	--										24.25	1.0294
									--										24.75	1.021	--	--										24	1.0291
									--										24.5	1.0208	--	--										23.75	1.0288
									--										24.25	1.0205	--	--										23.5	1.0285
									--										24	1.0203	--	--										23.25	1.0281
									--										23.75	1.0201	--	--										23	1.0278
									--										23.5	1.0199	--	--										22.75	1.0275
									--										23.25	1.0197	--	--										22.5	1.0272
									--										23	1.0195	--	--										22.25	1.0269
									--										22.75	1.0192	--	--										22	1.0266
									--										22.5	1.019	--	--										21.75	1.0263
									--										22.25	1.0188	--	--										21.5	1.026
									--										22	1.0186	--	--										21.25	1.0257
									--										21.75	1.0184	--	--										21	1.0254
									--										21.5	1.0182	--	--										20.75	1.0251
									--										21.25	1.0179	--	--										20.5	1.0248
									--										21	1.0177	--	--										20.25	1.0245
									--										20.75	1.0175	--	--										20	1.0242
									--										20.5	1.0173	--	--										19.75	1.0239
									--										20.25	1.0171	--	--										19.5	1.0236
									--										20	1.0169	--	--										19.25	1.0233
									--										19.75	1.0167	--	--										19	1.023
									--										19.5	1.0165	--	--										18.75	1.0227
									--										19.25	1.0162	--	--										18.5	1.0224
									--										19	1.016	--	--										18.25	1.0221
									--										18.75	1.0158	--	--										18	1.0218
									--										18.5	1.0156	--	--										17.75	1.0215
									--										18.25	1.0154	--	--										17.5	1.0212
									--										18	1.0152	--	--										17.25	1.0209
									--										17.75	1.015	--	--										17	1.0206
									--										17.5	1.0148	--	--										16.75	1.0203
									--										17.25	1.0146	--	--										16.5	1.02
									--										17	1.0144	--	--										16.25	1.0197
									--										16.75	1.0141	--	--										16	1.0194
									--										16.5	1.0139	--	--										15.75	1.0191
									--										16.25	1.0137	--	--										15.5	1.0188
									--										16	1.0135	--	--										15.25	1.0185
									--										15.75	1.0133	--	--										15	1.0182
									--										15.5	1.0131	--	--										14.75	1.0179
									--										15.25	1.0129	--	--										14.5	1.0176
									--										15	1.0127	--	--										14.25	1.0173
									--										14.75	1.0125	--	--										14	1.017
									--										14.5	1.0123	--	--										13.75	1.0167
									--										14.25	1.0121	--	--										13.5	1.0164
									--										14	1.0119	--	--										13.25	1.0161
									--										13.75	1.0117	--	--										13	1.0158
									--										13.5	1.0114	--	--										12.75	1.0155
									--										13.25	1.0112	--	--										12.5	1.0153
									--										13	1.011	--	--										12.25	1.015
									--										12.75	1.0108	--	--										12	1.0147
									--										12.5	1.0106	--	--										11.75	1.0144
									--										12.25	1.0104	--	--										11.5	1.0141
									--										12	1.0102	--	--										11.25	1.0138
									--										11.75	1.01	--	--										11	1.0135
									--										11.5	1.0098	--	--										10.75	1.0132
									--										11.25	1.0096	--	--										10.5	1.0129
									--										11	1.0094	--	--										10.25	1.0126
									--										10.75	1.0092	--	--										10	1.0123
									--										10.5	1.009	--	--										9.75	1.012
									--										10.25	1.0088	--	--										9.5	1.0117
									--										10	1.0085	--	--										9.25	1.0114
									--										9.75	1.0083	--	--										9	1.0111
									--										9.5	1.0081	--	--										8.75	1.0108
									--										9.25	1.0079	--	--										8.5	1.0105
									--										9	1.0077	--	--										8.25	1.0102
									--										8.75	1.0075	--	--										8	1.0099
									--										8.5	1.0073	--	--										7.75	1.0096
									--										8.25	1.0071	--	--										7.5	1.0093
									--										8	1.0069	--	--										7.25	1.009
									--										7.75	1.0067	--	--										7	1.0087
									--										7.5	1.0065	--	--										6.75	1.0084
									--										7.25	1.0063	--	--										6.5	1.0081
									--										7	1.0061	--	--										6.25	1.0078
									--										6.75	1.0058	--	--										6	1.0075
									--										6.5	1.0056	--	--										5.75	1.0072
									--										6.25	1.0054	--	--										5.5	1.0069
									--										6	1.0052	--	--										5.25	1.0066
									--										5.75	1.005	--	--										5	1.0063
									--										5.5	1.0048	--	--										4.75	1.006
									--										5.25	1.0046	--	--										4.5	1.0057
									--										5	1.0044	--	--										4.25	1.0054
									--										4.75	1.0042	--	--										4	1.0051
									--										4.5	1.0039	--	--										3.75	1.0048
									--										4.25	1.0037	--	--										3.5	1.0044
									--										4	1.0035	--	--										3.25	1.0041
									--										3.75	1.0033	--	--										3	1.0038
									--										3.5	1.0031	--	--										2.75	1.0035
									--										3.25	1.0029	--	--										2.5	1.0032
									--										3	1.0027	--	--										2.25	1.0029
									--										2.75	1.0024	--	--										2	1.0026
									--										2.5	1.0022	--	--										1.75	1.0023
									--										2.25	1.002	--	--										1.5	1.0019
									--										2	1.0018	--	--										1.25	1.0016
									--										1.75	1.0016	--	--										1	1.0013
									--										1.5	1.0013	--	--										0.75	1.001
									--										1.25	1.0011	--	--										0.5	1.0006
																			1	1.0009
																			0.75	1.0007
																			0.5	1.0005
																			--	--

## Sheet: Ammonium sulfate+4-HBC
Ammonium sulfate+4-hydroxybenzoic acid by mass ratio of 3:1 in the dehumidification mode				AIOMFAC (liquid organic) in the dehumidification mode		E-AIM in the dehumidification mode		AIOMFAC (soild organic) in the dehumidification		AIOMFAC (solid organic) in the humidification mode		E-AIM in the humidification mode			Ammonium sulfate+4-hydroxybenzoic acid by mass ratio of 1:1 in the dehumidification mode				AIOMFAC (liquid organic) in the dehumidification		E-AIM in the dehumidification mode		AIOMFAC (solid organic) in the dehumidification mode		AIOMFAC in the humidification mode		E-AIM in the humidification mode			Ammonium sulfate+4-hydroxybenzoic acid by mass ratio of 1:3 in the dehumidification mode				AIOMFAC (liquid organic) in the dehumidification mode		E -AIM in the dehumidification mode		AIOMFAC (solid orgnaic) in the dehumidification mode		AIOMFAC in the humidification mode		E-AIM in the humidification mode
measured RH				99.9	7.91576	34.375	1.02446	99.9	7.63983						measured RH				99.9	7.25217	24.975	1.02378	99.9	6.56834						measured RH				99.9	6.52689	E-AIM	--	99.9767	3.54683
RH				99.89	7.65641	35.55	1.14984	99.89	7.38686	99	3.3461	5	1.00861						99.89	7.01787	26.15	1.09313	99.89	6.35114	99	2.8902	5	1.00467		RH				99.89	6.31961	12.05	1.01584	99.9061	3.37205	99	2.2921		E-AIM
90	1.7	2.5	0.01	99.88	7.42684	36.725	1.15372	99.88	7.1629	98.75	3.0882	6.175	1.00912		RH	GF			99.88	6.81049	27.325	1.09573	99.88	6.15887	98.75	2.6712	6.175	1.00574		90	1.56	2.5	0.01	99.88	6.13612	13.225	1.04709	99.8324	3.22789	98.75	2.1265
85	1.6	2.5	0.01	99.87	7.22155	37.9	1.15765	99.87	6.96262	98.5	2.8938	7.35	1.00963		90	1.7	2.5	0.01	99.87	6.62507	28.5	1.09834	99.87	5.98694	98.5	2.5064	7.35	1.00681		85	1.34	2.5	0.01	99.87	5.97205	14.4	1.04905	99.7564	3.10615	98.5	2.003	5	1.00672
80	1.45	2.5	0.01	99.86	7.03639	39.075	1.16162	99.86	6.78196	98.25	2.7405	8.525	1.01027		88	1.51	2.5	0.01	99.86	6.45784	29.675	1.10097	99.86	5.83187	98.25	2.3769	8.525	1.00787		80	1.23	2.5	0.01	99.86	5.82406	15.575	1.05096	99.6863	3.01126	98.25	1.9065	6.175	1.00824
75	1.36	2.5	0.01	99.85	6.86816	40.25	1.16565	99.85	6.6178	98	2.6157	9.7	1.01079		85	1.44	2.5	0.01	99.85	6.30591	30.85	1.10362	99.85	5.69097	98	2.2717	9.7	1.00893		75	1.18	2.5	0.01	99.85	5.68959	16.75	1.05285	99.4849	2.7995	98	1.8288	7.35	1.00977
70	1.3	2.5	0.01	99.84	6.71433	41.425	1.16973	99.84	6.46767	97.75	2.5117	10.875	1.0113		80	1.35	2.5	0.01	99.84	6.16699	32.025	1.10629	99.84	5.56213	97.75	2.1843	10.875	1.01		70	1.15	2.5	0.01	99.84	5.56663	17.925	1.05471	99.2761	2.6392	97.75	1.7647	8.525	1.01128
65	1.26	2.5	0.01	99.83	6.57289	42.6	1.17387	99.83	6.32962	97.5	2.4233	12.05	1.01196		75	1.29	2.5	0.01	99.83	6.03927	33.2	1.10899	99.83	5.44367	97.5	2.1103	12.05	1.01108		65	1.11	2.5	0.01	99.83	5.45357	19.1	1.05656	99.0617	2.51213	97.5	1.7107	9.7	1.01279
60	1.22	2.5	0.01	99.82	6.44219	43.775	1.17808	99.82	6.20205	97.25	2.3472	13.225	1.01248		70	1.24	2.5	0.01	99.82	5.92127	34.375	1.11172	99.82	5.3342	97.25	2.0467	13.225	1.01217		60	1.1	2.5	0.01	99.82	5.34909	20.275	1.05839	98.843	2.40807	97.25	1.6647	10.875	1.01431
55	1.2	2.5	0.01	99.81	6.32089	44.95	1.18236	99.81	6.08364	97	2.2809	14.4	1.01302		65	1.2	2.5	0.01	99.81	5.81175	35.55	1.11449	99.81	5.23261	97	1.9913	14.4	1.01328		55	1.08	2.5	0.01	99.81	5.25213	21.45	1.06022	98.3958	2.24609	97	1.6249	12.05	1.01584
50	1.16	2.5	0.01	99.8	6.20788	46.125	1.18673	99.8	5.9733	96.75	2.2224	15.575	1.0137		60	1.16	2.5	0.01	99.8	5.70973	36.725	1.11729	99.8	5.13796	96.75	1.9427	15.575	1.01439		50	1.07	2.5	0.01	99.8	5.16178	22.625	1.06204	97.9387	2.12432	96.75	1.5902	13.225	1.01738
45	1.14	2.5	0.01	99.79	6.10222	47.3	1.19118	99.79	5.87013	96.5	2.1704	16.75	1.01425		55	1.14	2.5	0.01	99.79	5.61434	37.9	1.12013	99.79	5.04946	96.5	1.8996	16.75	1.01553		45	1.06	2.5	0.01	99.79	5.0773	23.8	1.06386	97.4744	2.02844	96.5	1.5596	14.4	1.01893
40	1.12	2.5	0.01	99.77	5.90988	48.475	1.19572	99.77	5.68231	96.25	2.1239	17.925	1.01482		50	1.13	2.5	0.01	99.77	5.44073	39.075	1.12302	99.77	4.88837	96.25	1.861	17.925	1.0166		40	1.05	2.5	0.01	99.77	4.92352	24.975	1.06569	97.0046	1.95043	96.25	1.5324	15.575	1.02047
35	1.11	2.5	0.01	99.75	5.73881	49.65	1.20037	99.75	5.51523	96	2.0819	19.1	1.01539		45	1.11	2.5	0.01	99.75	5.28634	40.25	1.12596	99.75	4.74509	96	1.8264	19.1	1.01778		35	1.04	2.5	0.01	99.75	4.78673	26.15	1.06752	96.5302	1.88536	96	1.508	16.75	1.02205
30	1	2.5	0.01	99.73	5.58524	50.825	1.20513	99.73	5.3652	95.75	2.0438	20.275	1.01599		40	1.09	2.5	0.01	99.73	5.14775	41.425	1.12896	99.73	4.61647	95.75	1.795	20.275	1.01891		30	1.03	2.5	0.01	99.73	4.66392	27.325	1.06936	96.0523	1.83003	95.75	1.4861	17.925	1.02364
25	1	2.5	0.01	99.71	5.44628	52	1.21001	99.71	5.22942	95.5	2.009	21.45	1.01659		35	1.08	2.5	0.01	99.71	5.02236	42.6	1.13201	99.71	4.50008	95.5	1.7664	21.45	1.02014		25	1.02	2.5	0.01	99.71	4.55277	28.5	1.07122	95.5713	1.78224	95.5	1.4663	19.1	1.02526
20	1	2.5	0.01	99.69	5.31966	53.175	1.21501	99.69	5.10569	95.25	1.9772	22.625	1.01735		30	1.07	2.5	0.01	99.69	4.90813	43.775	1.13512	99.69	4.39404	95.25	1.7403	22.625	1.02132		20	1.01	2.5	0.01	99.69	4.45149	29.675	1.07309	95.0877	1.74044	95.25	1.4483	20.275	1.02689
15	1	2.5	0.01	99.67	5.20362	54.35	1.22016	99.67	4.99225	95	1.9479	23.8	1.018		25	1.06	2.5	0.01	99.67	4.80345	44.95	1.13831	99.67	4.29685	95	1.7163	23.8	1.02253		15	1	2.5	0.01	99.67	4.35865	30.85	1.07497	94.602	1.70349	95	1.4318	21.45	1.02856
10	1	2.5	0.01	99.65	5.0967	55.525	1.22545	99.65	4.88772	94.75	1.9208	24.975	1.01866		20	1	2.5	0.01	99.65	4.707	46.125	1.14156	99.65	4.2073	94.75	1.6942	24.975	1.02378		10	1	2.5	0.01	99.65	4.27311	32.025	1.07688	94.1143	1.67052	94.75	1.4166	22.625	1.03024
				99.63	4.99773	56.7	1.23091	99.63	4.79095	94.5	1.8956	26.15	1.01934		15	1	2.5	0.01	99.63	4.61774	47.3	1.1449	99.63	4.12442	94.5	1.6737	26.15	1.02507						99.63	4.19391	33.2	1.07882	93.6251	1.64086	94.5	1.4027	23.8	1.03196
				99.61	4.90574	57.875	1.23655	99.61	4.70098	94.25	1.8722	27.325	1.01991		10	1	2.5	0.01	99.61	4.53478	48.475	1.14832	99.61	4.04738	94.25	1.6547	27.325	1.02631						99.61	4.12029	34.375	1.08077	93.1343	1.61402	94.25	1.3898	24.975	1.03371
				99.59	4.81991	59.05	1.24237	99.59	4.61703	94	1.8504	28.5	1.02064						99.59	4.4574	49.65	1.15183	99.59	3.97551	94	1.637	28.5	1.02768						99.59	4.05159	35.55	1.08276	92.6423	1.58956	94	1.3778	26.15	1.03549
				99.57	4.73958	60.225	1.2484	99.57	4.53843	93.75	1.8299	29.675	1.0214						99.57	4.38496	50.825	1.15544	99.57	3.90823	93.75	1.6204	29.675	1.02902						99.57	3.98728	36.725	1.08478	92.1492	1.56716	93.75	1.3667	27.325	1.03732
				99.55	4.66416	61.4	1.25466	99.55	4.46463	93.5	1.8107	30.85	1.02218						99.55	4.31696	52	1.15916	99.55	3.84507	93.5	1.6049	30.85	1.03041						99.55	3.92689	37.9	1.08684	91.655	1.54654	93.5	1.3563	28.5	1.03918
				99.53	4.59314	62.575	1.26117	99.53	4.39513	93.25	1.7927	32.025	1.02287						99.53	4.25294	53.175	1.16299	99.53	3.7856	93.25	1.5903	32.025	1.03185						99.53	3.87003	39.075	1.08893	91.1567	1.52291	93.25	1.3466	29.675	1.04109
				99.51	4.52612	63.75	1.26794	99.51	4.32951	93	1.7756	33.2	1.02371						99.51	4.19252	54.35	1.16695	99.51	3.72947	93	1.5765	33.2	1.03335						99.51	3.81634	40.25	1.09106	90.6551	1.49047	93	1.3375	30.85	1.04304
				99.49	4.4627	64.925	1.275	99.49	4.26743	92.75	1.7595	34.375	1.02446						99.49	4.13537	55.525	1.17104	99.49	3.67638	92.75	1.5636	34.375	1.03483						99.49	3.76555	41.425	1.09324	90.1555	1.46383	92.75	1.3289	32.025	1.04504
				99.39	4.1898	66.1	1.28239	99.39	4.00011	92.5	1.7443	35.55	1.02538						99.39	3.88943	56.7	1.17528	99.39	3.44789	92.5	1.5513	35.55	1.03647						99.39	3.54683	42.6	1.09547	89.6557	1.44131	92.5	1.3208	33.2	1.0471
				99.29	3.97192	67.275	1.29013	99.29	3.78652	92.25	1.7298	36.725	1.02621						99.29	3.69313	57.875	1.17967	99.29	3.26552	92.25	1.5397	36.725	1.03809						99.29	3.37205	43.775	1.09775	89.1555	1.42186	92.25	1.3132	34.375	1.04922
				99.19	3.79242	68.45	1.29827	99.19	3.61043	92	1.716	37.9	1.02708						99.19	3.53144	59.05	1.18423	99.19	3.11533	92	1.5287	37.9	1.03971						99.19	3.22789	44.95	1.10008	88.6547	1.40477	92	1.306	35.55	1.05139
				99.09	3.64101	69.625	1.30683	99.09	3.46181	91.75	1.7029	39.075	1.028						99.09	3.39506	60.225	1.18898	99.09	2.98871	91.75	1.5182	39.075	1.04141						99.09	3.10615	46.125	1.10248	88.1533	1.38957	91.75	1.2991	36.725	1.05364
				99	3.52315	70.8	1.31588	99	3.34606	91.5	1.6904	40.25	1.02897						99	3.28889	61.4	1.19393	99	2.89019	91.5	1.5083	40.25	1.04321						99	3.01126	47.3	1.10493	87.6515	1.3759	91.5	1.2926	37.9	1.05596
				98.75	3.26081	71.975	1.32546	98.75	3.08825	91.25	1.6785	41.425	1.03						98.75	3.05248	62.575	1.1991	98.75	2.67116	91.25	1.4987	41.425	1.04511						98.75	2.7995	48.475	1.10746	87.1492	1.36349	91.25	1.2865	39.075	1.05835
				98.5	3.06308	73.15	1.33565	98.5	2.89384	91	1.667	42.6	1.03108						98.5	2.87412	63.75	1.20452	98.5	2.50644	91	1.4896	42.6	1.04703						98.5	2.6392	49.65	1.11006	86.6466	1.35214	91	1.2806	40.25	1.06083
				98.25	2.90712	74.325	1.34651	98.25	2.74051	90.75	1.6561	43.775	1.0321						98.25	2.73323	64.925	1.2102	98.25	2.37689	90.75	1.481	43.775	1.04907						98.25	2.51213	50.825	1.11275	86.1436	1.34169	90.75	1.275	41.425	1.06341
				98	2.78007	75.5	1.35813	98	2.61569	90.5	1.6456	44.95	1.03332						98	2.61825	66.1	1.21617	98	2.27172	90.5	1.4726	44.95	1.05116						98	2.40807	52	1.11552	85.6403	1.33202	90.5	1.2696	42.6	1.06607
				97.5	2.58392	76.675	1.37062	97.5	2.42334	90.25	1.6355	46.125	1.03449						97.5	2.44015	67.275	1.22246	97.5	2.11028	90.25	1.4646	46.125	1.0533						97.5	2.24609	53.175	1.11838	85.1368	1.32303	90.25	1.2645	43.775	1.06886
				97	2.4381	77.85	1.38411	97	2.28088	90	1.6258	47.3	1.03574						97	2.30709	68.45	1.2291	97	1.99134	90	1.457	47.3	1.0556						97	2.12432	54.35	1.12134	84.633	1.31463	90	1.2596	44.95	1.07174
				96.5	2.3245	79.025	1.39875	96.5	2.17042	89.75	1.6165	48.475	1.03709						96.5	2.20289	69.625	1.23615	96.5	1.89959	89.75	1.4496	48.475	1.05807						96.5	2.02844	55.525	1.12441	84.129	1.30675	89.75	1.2549	46.125	1.07476
				96	2.23295	80.2	1.41473	96	2.08187	89.5	1.6075	49.65	1.03841						96	2.1185	70.8	1.24363	96	1.82638	89.5	1.4425	49.65	1.06057						96	1.95043	56.7	1.1276	83.6248	1.29933	89.5	1.2504	47.3	1.07792
				95.5	2.15725	81.375	1.43227	95.5	2.00902	89.25	1.5989	50.825	1.03998						95.5	2.04838	71.975	1.25161	95.5	1.76644	89.25	1.4357	50.825	1.06327						95.5	1.88536	57.875	1.13092	83.1205	1.29234	89.25	1.2461	48.475	1.08124
				95	2.09334	82.55	1.45166	95	1.94786	89	1.5905	52	1.04155						95	1.98893	73.15	1.26014	95	1.71633	89	1.4291	52	1.06612						95	1.83003	59.05	1.13437	82.616	1.28571	89	1.2419	49.65	1.08471
				94.5	2.0385	83.725	1.47326	94.5	1.89563	88.75	1.5824	53.175	1.04313						94.5	1.93771	74.325	1.26931	94.5	1.67372	88.75	1.4228	53.175	1.06914						94.5	1.78224	60.225	1.13797	82.1113	1.27942	88.75	1.2379	50.825	1.08838
				94	1.99078	84.9	1.49753	94	1.8504	88.5	1.5746	54.35	1.04487						94	1.89297	75.5	1.27919	94	1.63696	88.5	1.4167	54.35	1.07229						94	1.74044	61.4	1.14174	81.6065	1.27344	88.5	1.2341	52	1.09226
				93.5	1.94877	86.075	1.52509	93.5	1.81075	88.25	1.5671	55.525	1.0468						93.5	1.85345	76.675	1.28989	93.5	1.60487	88.25	1.4108	55.525	1.07577						93.5	1.70349	62.575	1.14569	81.1016	1.26774	88.25	1.2304	53.175	1.09636
				93	1.9114	87.25	1.55674	93	1.77564	88	1.5598	56.7	1.04881						93	1.81821	77.85	1.30153	93	1.57655	88	1.405	56.7	1.07946						93	1.67052	63.75	1.14983	80.5965	1.26229	88	1.2268	54.35	1.10072
				92.5	1.87789	88.425	1.59358	92.5	1.74427	87.75	1.5527	57.875	1.05105						92.5	1.78652	79.025	1.31426	92.5	1.55134	87.75	1.3995	57.875	1.08341						92.5	1.64086	64.925	1.15419	80.0914	1.25708	87.75	1.2233	55.525	1.10537
				92	1.84761	89.6	1.63712	92	1.71602	87.5	1.5458	59.05	1.05345						92	1.75781	80.2	1.32827	92	1.52871	87.5	1.3941	59.05	1.0877						92	1.61402	66.1	1.15879	79.5862	1.25208	87.5	1.22	56.7	1.11034
				91.5	1.82005	90.775	1.68952	91.5	1.6904	87.25	1.5391	60.225	1.05604						91.5	1.73164	81.375	1.34378	91.5	1.50825	87.25	1.3889	60.225	1.09231						91.5	1.58956	67.275	1.16365	79.0808	1.24728	87.25	1.2167	57.875	1.11569
				91	1.79484	91.95	1.75402	91	1.66703	87	1.5327	61.4	1.05901						91	1.70765	82.55	1.36107	91	1.48964	87	1.3839	61.4	1.09744						91	1.56716	68.45	1.1688	78.5754	1.24267	87	1.2136	59.05	1.12147
				90.5	1.77164	93.125	1.83562	90.5	1.64559	86.75	1.5264	62.575	1.06219						90.5	1.68554	83.725	1.38051	90.5	1.47263	86.75	1.379	62.575	1.10312						90.5	1.54654	69.625	1.17428	78.07	1.23823	86.75	1.2106	60.225	1.12775
				90	1.75021	94.3	1.9426	90	1.62582	86.5	1.5202	63.75	1.06578						90	1.65826	84.9	1.40254	90	1.45699	86.5	1.3742	63.75	1.10937						90	1.52291	70.8	1.18012	77.5644	1.23395	86.5	1.2076	61.4	1.1346
				89.5	1.73031	95.475	2.08988	89.5	1.60752	86.25	1.5143	64.925	1.06979						89.5	1.61989	86.075	1.42777	89.5	1.44254	86.25	1.3696	64.925	1.1164						89.5	1.49047	71.975	1.18636	77.0588	1.22982	86.25	1.2048	62.575	1.14215
				89	1.70931	96.65	2.30816	89	1.5905	86	1.5085	66.1	1.07439						89	1.58828	87.25	1.45697	89	1.42915	86	1.3651	66.1	1.12442						89	1.46383	73.15	1.19307	76.5531	1.22583	86	1.202	63.75	1.14983
				88.5	1.67865	97.825	2.67645	88.5	1.57463	85.75	1.5028	67.275	1.07969						88.5	1.56148	88.425	1.49121	88.5	1.41668	85.75	1.3607	67.275	1.13366						88.5	1.44131	74.325	1.2003	76.0473	1.22197	85.75	1.1993	64.925	1.15419
				88	1.65206	99	3.51922	88	1.55976	85.5	1.4973	68.45	1.08589						88	1.53828	89.6	1.53194	88	1.40504	85.5	1.3565	68.45	1.14444						88	1.42186	75.5	1.20813	75.5415	1.21823	85.5	1.1967	66.1	1.15879
				87.5	1.6286			87.5	1.5458	85.25	1.492	69.625	1.09348						87.5	1.51785	90.775	1.58123	87.5	1.39413	85.25	1.3523	69.625	1.15731						87.5	1.40477	76.675	1.21665	75.0356	1.2146	85.25	1.1942	67.275	1.16365
				87	1.60765			87	1.53265	85	1.4867	70.8	1.10283						87	1.49963	91.95	1.64209	87	1.38388	85	1.3483	70.8	1.17305						87	1.38957	77.85	1.22596	74.5297	1.21109	85	1.1917	68.45	1.1688
				86.5	1.58873			86.5	1.52024	84.75	1.4816	71.975	1.1147						86.5	1.4832	93.125	1.71916	86.5	1.37423	84.75	1.3444	71.975	1.19291						86.5	1.3759	79.025	1.23619	74.0238	1.20767	84.75	1.1893	69.625	1.17428
				86	1.5715			86	1.50849	84.5	1.4767	73.15	1.13048						86	1.46827	94.3	1.82001	86	1.36511	84.5	1.3405	73.15	1.21902						86	1.36349	80.2	1.24751	73.5177	1.20436	84.5	1.1869	70.8	1.18012
				85.5	1.55568			85.5	1.49734	84.25	1.4718	74.325	1.15286						85.5	1.45458	95.475	1.95824	85.5	1.35648	84.25	1.3368	74.325	1.25527						85.5	1.35214	81.375	1.26013	73.0117	1.20113	84.25	1.1847	71.975	1.18636
				85	1.54108			85	1.48674	84	1.467	75.5	1.18708						85	1.44196	96.65	2.16183	85	1.3483	84	1.3331	75.5	1.27919						85	1.34169	82.55	1.27428	72.5056	1.19799	84	1.1824	73.15	1.19307
				84.5	1.52752			84.5	1.47665	83.75	1.4624	76.675	1.24477						84.5	1.43026	97.825	2.50286	84.5	1.34052	83.75	1.3295	76.675	1.28989						84.5	1.33202	83.725	1.29032	71.9995	1.19494	83.75	1.1803	74.325	1.2003
				84	1.51487			84	1.46702	83.5	1.4578	77.85	1.35653						84	1.41935	99	3.27751	84	1.33311	83.5	1.326	77.85	1.30153						84	1.32303	84.9	1.30864	71.4933	1.19196	83.5	1.1782	75.5	1.20813
				83.5	1.50302			83.5	1.45782	83.25	1.4534	79.025	1.39875						83.5	1.40915			83.5	1.32604	83.25	1.3226	79.025	1.31426						83.5	1.31463	86.075	1.32981	70.9871	1.18905	83.25	1.1761	76.675	1.21665
				83	1.49187			83	1.44901	83	1.449	80.2	1.41473						83	1.39956			83	1.31929	83	1.3193	80.2	1.32827						83	1.30675	87.25	1.35457	70.4808	1.18622	83	1.1741	77.85	1.22596
				82.5	1.48135			82.5	1.44057	82.75	1.4447	81.375	1.43227						82.5	1.39053			82.5	1.31283	82.75	1.316	81.375	1.34378						82.5	1.29933	88.425	1.38392	69.9746	1.18345	82.75	1.1721	79.025	1.23619
				82	1.47139			82	1.43246	82.5	1.4406	82.55	1.45166						82	1.38199			82	1.30664	82.5	1.3128	82.55	1.36107						82	1.29234	89.6	1.41924	69.4683	1.18074	82.5	1.1702	80.2	1.24751
				81.5	1.46193			81.5	1.42467	82.25	1.4365	83.725	1.47326						81.5	1.37389			81.5	1.3007	82.25	1.3097	83.725	1.38051						81.5	1.28571	90.775	1.46252	68.9619	1.1781	82.25	1.1683	81.375	1.26013
				81	1.45294			81	1.41716	82	1.4325	84.9	1.49753						81	1.36619			81	1.295	82	1.3066	84.9	1.40254						81	1.27942	91.95	1.51662	68.4556	1.17552	82	1.1665	82.55	1.27428
				80.5	1.44436			80.5	1.40993	81.75	1.4285	86.075	1.52509						80.5	1.35885			80.5	1.28951	81.75	1.3036	86.075	1.42777						80.5	1.27344	93.125	1.58593	67.9492	1.17299	81.75	1.1647	83.725	1.29032
				80	1.43616			80	1.40296	81.5	1.4247	87.25	1.55674						80	1.35185			80	1.28422	81.5	1.3007	87.25	1.45697						80	1.26774	94.3	1.67754	67.4428	1.17051	81.5	1.1629	84.9	1.30864
				79.5	1.4283			79.5	1.39622	81.25	1.4209	88.425	1.59358						79.5	1.34516			79.5	1.27912	81.25	1.2978	88.425	1.49121						79.5	1.26229	95.475	1.80395	66.9363	1.16809	81.25	1.1612	86.075	1.32981
				79	1.42077			79	1.38971	81	1.4172	89.6	1.63712						79	1.33874			79	1.2742	81	1.295	89.6	1.53194						79	1.25708	96.65	1.99063	66.4299	1.16571	81	1.1595	87.25	1.35457
				78.5	1.41353			78.5	1.38341	80.75	1.4135	90.775	1.68952						78.5	1.33258			78.5	1.26944	80.75	1.2922	90.775	1.58123						78.5	1.25208	97.825	2.30261	65.9234	1.16338	80.75	1.1579	88.425	1.38392
				78	1.40657			78	1.37731	80.5	1.4099	91.95	1.75402						78	1.32666			78	1.26485	80.5	1.2895	91.95	1.64209						78	1.24728	99	3.00538	65.4169	1.1611	80.5	1.1563	89.6	1.41924
				77.5	1.39985			77.5	1.37139	80.25	1.4064	93.125	1.83562						77.5	1.32096			77.5	1.2604	80.25	1.2868	93.125	1.71916						77.5	1.24267			64.9103	1.15886	80.25	1.1547	90.775	1.46252
				77	1.39337			77	1.36565	80	1.403	94.3	1.9426						77	1.31546			77	1.25609	80	1.2842	94.3	1.82001						77	1.23823			64.4038	1.15666	80	1.1531	91.95	1.51662
				76.5	1.38711			76.5	1.36007	79.75	1.3996	95.475	2.08988						76.5	1.31015			76.5	1.25191	79.75	1.2816	95.475	1.95824						76.5	1.23395			63.8972	1.1545	79.75	1.1516	93.125	1.58593
				76	1.38106			76	1.35465	79.75	1	96.65	2.30816						76	1.30503			76	1.24785	79.5	1	96.65	2.16183						76	1.22982			63.3906	1.15238	79.75	1	94.3	1.67754
				75.5	1.37519			75.5	1.34939	79.5	1	97.825	2.67645						75.5	1.30007			75.5	1.24392	79.25	1	97.825	2.50286						75.5	1.22583			62.884	1.1503	79.5	1	95.475	1.80395
				75	1.3695			75	1.34426	79.25	1	99	3.51922						75	1.29526			75	1.24009	79	1	99	3.27751						75	1.22197			62.3774	1.14825	79.25	1	96.65	1.99063
				74.5	1.36399			74.5	1.33927	79	1								74.5	1.2906			74.5	1.23637	78.75	1								74.5	1.21823			61.8708	1.14624	79	1	97.825	2.30261
				74	1.35863			74	1.3344	78.75	1								74	1.28608			74	1.23275	78.5	1								74	1.2146			61.3641	1.14426	78.75	1	99	3.00538
				73.5	1.35341			73.5	1.32966	78.5	1								73.5	1.28169			73.5	1.22922	78.25	1								73.5	1.21109			60.8574	1.14231	78.5	1
				73	1.34834			73	1.32503	78.25	1								73	1.27742			73	1.22579	78	1								73	1.20767			60.3507	1.14039	78.25	1
				72.5	1.3434			72.5	1.32051	78	1								72.5	1.27327			72.5	1.22244	77.75	1								72.5	1.20436			59.844	1.1385	78	1
				72	1.33859			72	1.31609	77.75	1								72	1.26923			72	1.21917	77.5	1								72	1.20113			59.3373	1.13664	77.75	1
				71.5	1.3339			71.5	1.31178	77.5	1								71.5	1.26529			71.5	1.21598	77.25	1								71.5	1.19799			58.8306	1.13481	77.5	1
				71	1.32932			71	1.30756	77.25	1								71	1.26144			71	1.21287	77	1								71	1.19494			58.3238	1.133	77.25	1
				70.5	1.32484			70.5	1.30343	77	1								70.5	1.2577			70.5	1.20983	76.75	1								70.5	1.19196			57.8171	1.13122	77	1
				70	1.32047			70	1.2994	76.75	1								70	1.25404			70	1.20685	76.5	1								70	1.18905			57.3103	1.12947	76.75	1
				69.5	1.31619			69.5	1.29544	76.5	1								69.5	1.25046			69.5	1.20394	76.25	1								69.5	1.18622			56.8035	1.12774	76.5	1
				69	1.31201			69	1.29156	76.25	1								69	1.24697			69	1.2011	76	1								69	1.18345			56.2967	1.12603	76.25	1
				68.5	1.30791			68.5	1.28776	76	1								68.5	1.24355			68.5	1.19831	75.75	1								68.5	1.18074			55.7899	1.12435	76	1
				68	1.3039			68	1.28404	75.75	1								68	1.24021			68	1.19558	75.5	1								68	1.1781			55.2831	1.12269	75.75	1
				67.5	1.29997			67.5	1.28038	75.5	1		--						67.5	1.23693			67.5	1.19291	75.25	1		--						67.5	1.17552			54.7763	1.12105	75.5	1
				67	1.29612			67	1.2768	75.25	1		--						67	1.23372			67	1.19029	75	1		--						67	1.17299			54.2694	1.11943	75.25	1
				66.5	1.29234			66.5	1.27327	75	1		--						66.5	1.23058			66.5	1.18772	74.75	1		--						66.5	1.17051			53.7626	1.11783	75	1		--
				66	1.28863			66	1.26981	74.75	1		--						66	1.2275			66	1.18519	74.5	1		--						66	1.16809			53.2557	1.11625	74.75	1		--
				65.5	1.28498			65.5	1.26642	74.5	1		--						65.5	1.22447			65.5	1.18272	74.25	1		--						65.5	1.16571			52.7488	1.11469	74.5	1		--
				65	1.2814			65	1.26307	74.25	1		--						65	1.2215			65	1.18029	74	1		--						65	1.16338			52.242	1.11314	74.25	1		--
				64.5	1.27788			64.5	1.25979	74	1		--						64.5	1.21859			64.5	1.1779	73.75	1		--						64.5	1.1611			51.7351	1.11162	74	1		--
				64	1.27442			64	1.25656	73.75	1		--						64	1.21573			64	1.17556	73.5	1		--						64	1.15886			51.2281	1.11011	73.75	1		--
				63.5	1.27102			63.5	1.25338	73.5	1		--						63.5	1.21291			63.5	1.17325	73.25	1		--						63.5	1.15666			50.7212	1.10862	73.5	1		--
				63	1.26768			63	1.25025	73.25	1		--						63	1.21015			63	1.17099	73	1		--						63	1.1545			50.2143	1.10714	73.25	1		--
				62.5	1.26438			62.5	1.24717	73	1		--						62.5	1.20743			62.5	1.16876	72.75	1		--						62.5	1.15238			49.7074	1.10568	73	1		--
				62	1.26114			62	1.24413	72.75	1		--						62	1.20476			62	1.16656	72.5	1		--						62	1.1503			49.2004	1.10424	72.75	1		--
				61.5	1.25794			61.5	1.24114	72.5	1		--						61.5	1.20212			61.5	1.16441	72.25	1		--						61.5	1.14825			48.6935	1.10281	72.5	1		--
				61	1.2548			61	1.23819	72.25	1		--						61	1.19953			61	1.16228	72	1		--						61	1.14624			48.1865	1.10139	72.25	1		--
				60.5	1.25169			60.5	1.23528	72	1		--						60.5	1.19698			60.5	1.16019	71.75	1		--						60.5	1.14426			47.6796	1.09999	72	1		--
				60	1.24863			60	1.23242	71.75	1		--						60	1.19447			60	1.15813	71.5	1		--						60	1.14231			47.1726	1.0986	71.75	1		--
				59.5	1.24561			59.5	1.22959	71.5	1		--						59.5	1.19199			59.5	1.1561	71.25	1		--						59.5	1.14039			46.6656	1.09723	71.5	1		--
				59	1.24264			59	1.2268	71.25	1		--						59	1.18955			59	1.15409	71	1		--						59	1.1385			46.1587	1.09587	71.25	1		--
				58.5	1.2397			58.5	1.22404	71	1		--						58.5	1.18714			58.5	1.15212	70.75	1		--						58.5	1.13664			45.6517	1.09452	71	1		--
				58	1.2368			58	1.22132	70.75	1		--						58	1.18477			58	1.15017	70.5	1		--						58	1.13481			45.1447	1.09318	70.75	1		--
				57.5	1.23393			57.5	1.21863	70.5	1		--						57.5	1.18242			57.5	1.14825	70.25	1		--						57.5	1.133			44.6377	1.09186	70.5	1		--
				57	1.2311			57	1.21598	70.25	1		--						57	1.18011			57	1.14635	70	1		--						57	1.13122			44.1306	1.09054	70.25	1		--
				56.5	1.22831			56.5	1.21336	70	1		--						56.5	1.17783			56.5	1.14448	69.75	1		--						56.5	1.12947			43.6236	1.08924	70	1		--
				56	1.22554			56	1.21077	69.75	1		--						56	1.17558			56	1.14263	69.5	1		--						56	1.12774			43.1166	1.08794	69.75	1		--
				55.5	1.22281			55.5	1.2082	69.5	1		--						55.5	1.17335			55.5	1.14081	69.25	1		--						55.5	1.12603			42.6095	1.08666	69.5	1		--
				55	1.22011			55	1.20567	69.25	1		--						55	1.17115			55	1.13901	69	1		--						55	1.12435			42.1025	1.08539	69.25	1		--
				54.5	1.21744			54.5	1.20316	69	1		--						54.5	1.16898			54.5	1.13722	68.75	1		--						54.5	1.12269			41.5955	1.08413	69	1		--
				54	1.2148			54	1.20068	68.75	1		--						54	1.16683			54	1.13546	68.5	1		--						54	1.12105			41.0884	1.08288	68.75	1		--
				53.5	1.21218			53.5	1.19823	68.5	1		--						53.5	1.16471			53.5	1.13372	68.25	1		--						53.5	1.11943			40.5813	1.08163	68.5	1		--
				53	1.20959			53	1.1958	68.25	1		--						53	1.16261			53	1.132	68	1		--						53	1.11783			40.0743	1.0804	68.25	1		--
				52.5	1.20703			52.5	1.19339	68	1		--						52.5	1.16054			52.5	1.1303	67.75	1		--						52.5	1.11625			39.5672	1.07918	68	1		--
				52	1.20449			52	1.19101	67.75	1		--						52	1.15848			52	1.12861	67.5	1		--						52	1.11469			39.0601	1.07796	67.75	1		--
				51.5	1.20197			51.5	1.18865	67.5	1		--						51.5	1.15645			51.5	1.12694	67.25	1		--						51.5	1.11314			38.553	1.07675	67.5	1		--
				51	1.19948			51	1.18631	67.25	1		--						51	1.15443			51	1.12529	67	1		--						51	1.11162			38.0459	1.07555	67.25	1		--
				50.5	1.19701			50.5	1.18399	67	1		--						50.5	1.15244			50.5	1.12366	66.75	1		--						50.5	1.11011			37.5388	1.07436	67	1		--
				50	1.19456			50	1.18169	66.75	1		--						50	1.15047			50	1.12204	66.5	1		--						50	1.10862			37.0317	1.07318	66.75	1		--
				49.5	1.19213			49.5	1.17941	66.5	1		--						49.5	1.14852			49.5	1.12043	66.25	1		--						49.5	1.10714			36.5246	1.07201	66.5	1		--
				49	1.18972			49	1.17715	66.25	1		--						49	1.14658			49	1.11885	66	1		--						49	1.10568			36.0175	1.07084	66.25	1		--
				48.5	1.18733			48.5	1.17491	66	1		--						48.5	1.14466			48.5	1.11727	65.75	1		--						48.5	1.10424			35.5104	1.06968	66	1		--
				48	1.18496			48	1.17268	65.75	1		--						48	1.14276			48	1.11571	65.5	1		--						48	1.10281			35.0033	1.06853	65.75	1		--
				47.5	1.18261			47.5	1.17048	65.5	1		--						47.5	1.14087			47.5	1.11416	65.25	1		--						47.5	1.10139			34	1.03394	65.5	1		--
				47	1.18028			47	1.16828	65.25	1		--						47	1.13901			47	1.11263	65	1		--						47	1.09999			33.5	1.03336	65.25	1		--
				46.5	1.17796			46.5	1.16611	65	1		--						46.5	1.13715			46.5	1.11111	64.75	1		--						46.5	1.0986			33	1.03279	65	1		--
				46	1.17566			46	1.16395	64.75	1		--						46	1.13531			46	1.1096	64.5	1		--						46	1.09723			32.5	1.03222	64.75	1		--
				45.5	1.17337			45.5	1.1618	64.5	1		--						45.5	1.13349			45.5	1.1081	64.25	1		--						45.5	1.09587			32	1.03165	64.5	1		--
				45	1.1711			45	1.15967	64.25	1		--						45	1.13168			45	1.10661	64	1		--						45	1.09452			31.5	1.03109	64.25	1		--
				44.5	1.16884			44.5	1.15755	64	1		--						44.5	1.12988			44.5	1.10513	63.75	1		--						44.5	1.09318			31	1.03053	64	1		--
				44	1.1666			44	1.15544	63.75	1		--						44	1.1281			44	1.10367	63.5	1		--						44	1.09186			30.5	1.02998	63.75	1		--
				43.5	1.16437			43.5	1.15335	63.5	1		--						43.5	1.12633			43.5	1.10221	63.25	1		--						43.5	1.09054			30	1.02943	63.5	1		--
				43	1.16216			43	1.15127	63.25	1		--						43	1.12457			43	1.10077	63	1		--						43	1.08924			29.5	1.02888	63.25	1		--
				42.5	1.15995			42.5	1.1492	63	1		--						42.5	1.12282			42.5	1.09933	62.75	1		--						42.5	1.08794			29	1.02834	63	1		--
				42	1.15776			42	1.14714	62.75	1		--						42	1.12109			42	1.0979	62.5	1		--						42	1.08666			28.5	1.0278	62.75	1		--
				41.5	1.15558			41.5	1.14509	62.5	1		--						41.5	1.11936			41.5	1.09648	62.25	1		--						41.5	1.08539			28	1.02726	62.5	1		--
				41	1.15341			41	1.14305	62.25	1		--						41	1.11765			41	1.09507	62	1		--						41	1.08413			27.5	1.02673	62.25	1		--
				40.5	1.15125			40.5	1.14102	62	1		--						40.5	1.11595			40.5	1.09367	61.75	1		--						40.5	1.08288			27	1.0262	62	1		--
				40	1.14911			40	1.139	61.75	1		--						40	1.11425			40	1.09228	61.5	1		--						40	1.08163			26.5	1.02568	61.75	1		--
				39.5	1.14697			39.5	1.13699	61.5	1		--						39.5	1.11257			39.5	1.09089	61.25	1		--						39.5	1.0804			26	1.02516	61.5	1		--
				39	1.14484			39	1.13499	61.25	1		--						39	1.1109			39	1.08951	61	1		--						39	1.07918			25.5	1.02464	61.25	1		--
				38.5	1.14273			38.5	1.133	61	1		--						38.5	1.10924			38.5	1.08814	60.75	1		--						38.5	1.07796			25	1.02412	61	1		--
				38	1.14062			38	1.13102	60.75	1		--						38	1.10758			38	1.08678	60.5	1		--						38	1.07675			24.5	1.02361	60.75	1		--
				37.5	1.13852			37.5	1.12904	60.5	1		--						37.5	1.10594			37.5	1.08542	60.25	1		--						37.5	1.07555			24	1.0231	60.5	1		--
				37	1.13643			37	1.12708	60.25	1		--						37	1.1043			37	1.08407	60	1		--						37	1.07436			23.5	1.02259	60.25	1		--
				36.5	1.13435			36.5	1.12512	60	1		--						36.5	1.10267			36.5	1.08273	59.75	1		--						36.5	1.07318			23	1.02208	60	1		--
				36	1.13227			36	1.12317	59.75	1		--						36	1.10106			36	1.08139	59.5	1		--						36	1.07201			22.5	1.02158	59.75	1		--
				35.5	1.13021			35.5	1.12123	59.5	1		--						35.5	1.09945			35.5	1.08007	59.25	1		--						35.5	1.07084			22	1.02108	59.5	1		--
				35	1.12816			35	1.1193	59.25	1		--						35	1.09784			35	1.07874	59	1		--						35	1.06968			21.5	1.02058	59.25	1		--
				34.5	1.12611			34.5	1.11737	59	1		--						34.5	1.09625			34.5	1.07743	58.75	1		--						34.5	1.06853			21	1.02009	59	1		--
				34	1.01311			34	1	58.75	1		--						34	1.02429			34	1	58.5	1		--						34	1.03394			20.5	1.01959	58.75	1		--
				33.5	1.01288			33.5	1	58.5	1		--						33.5	1.02387			33.5	1	58.25	1		--						33.5	1.03336			20	1.0191	58.5	1		--
				33	1.01266			33	1	58.25	1		--						33	1.02346			33	1	58	1		--						33	1.03279			19.5	1.01861	58.25	1		--
				32.5	1.01243			32.5	1	58	1		--						32.5	1.02305			32.5	1	57.75	1		--						32.5	1.03222			19	1.01813	58	1		--
				32	1.01221			32	1	57.75	1		--						32	1.02264			32	1	57.5	1		--						32	1.03165			18.5	1.01764	57.75	1		--
				31.5	1.01199			31.5	1	57.5	1		--						31.5	1.02223			31.5	1	57.25	1		--						31.5	1.03109			18	1.01716	57.5	1		--
				31	1.01177			31	1	57.25	1		--						31	1.02183			31	1	57	1		--						31	1.03053			17.5	1.01668	57.25	1		--
				30.5	1.01155			30.5	1	57	1		--						30.5	1.02143			30.5	1	56.75	1		--						30.5	1.02998			17	1.0162	57	1		--
				30	1.01134			30	1	56.75	1		--						30	1.02103			30	1	56.5	1		--						30	1.02943			16.5	1.01572	56.75	1		--
				29.5	1.01112			29.5	1	56.5	1		--						29.5	1.02064			29.5	1	56.25	1		--						29.5	1.02888			16	1.01524	56.5	1		--
				29	1.01091			29	1	56.25	1		--						29	1.02025			29	1	56	1		--						29	1.02834			15.5	1.01476	56.25	1		--
				28.5	1.0107			28.5	1	56	1		--						28.5	1.01986			28.5	1	55.75	1		--						28.5	1.0278			15	1.01429	56	1		--
				28	1.01049			28	1	55.75	1		--						28	1.01948			28	1	55.5	1		--						28	1.02726			14.5	1.01381	55.75	1		--
				27.5	1.01028			27.5	1	55.5	1		--						27.5	1.01909			27.5	1	55.25	1		--						27.5	1.02673			14	1.01334	55.5	1		--
				27	1.01008			27	1	55.25	1		--						27	1.01871			27	1	55	1		--						27	1.0262			13.5	1.01287	55.25	1		--
				26.5	1.00987			26.5	1	55	1		--						26.5	1.01834			26.5	1	54.75	1		--						26.5	1.02568			13	1.0124	55	1		--
				26	1.00967			26	1	54.75	1		--						26	1.01796			26	1	54.5	1		--						26	1.02516			12.5	1.01193	54.75	1		--
				25.5	1.00946			25.5	1	54.5	1		--						25.5	1.01759			25.5	1	54.25	1		--						25.5	1.02464			12	1.01146	54.5	1		--
				25	1.00926			25	1	54.25	1		--						25	1.01722			25	1	54	1		--						25	1.02412			11.5	1.01099	54.25	1		--
				24.5	1.00906			24.5	1	54	1		--						24.5	1.01685			24.5	1	53.75	1		--						24.5	1.02361			11	1.01052	54	1		--
				24	1.00886			24	1	53.75	1		--						24	1.01648			24	1	53.5	1		--						24	1.0231			10.5	1.01005	53.75	1		--
				23.5	1.00867			23.5	1	53.5	1		--						23.5	1.01612			23.5	1	53.25	1		--						23.5	1.02259			10	1.00958	53.5	1		--
				23	1.00847			23	1	53.25	1		--						23	1.01575			23	1	53	1		--						23	1.02208			9.5	1.00911	53.25	1		--
				22.5	1.00828			22.5	1	53	1		--						22.5	1.01539			22.5	1	52.75	1		--						22.5	1.02158			9	1.00865	53	1		--
				22	1.00808			22	1	52.75	1		--						22	1.01503			22	1	52.5	1		--						22	1.02108			8.5	1.00818	52.75	1		--
				21.5	1.00789			21.5	1	52.5	1		--						21.5	1.01468			21.5	1	52.25	1		--						21.5	1.02058			8	1.00771	52.5	1		--
				21	1.0077			21	1	52.25	1		--						21	1.01432			21	1	52	1		--						21	1.02009			7.5	1.00724	52.25	1		--
				20.5	1.0075			20.5	1	52	1		--						20.5	1.01397			20.5	1	51.75	1		--						20.5	1.01959			7	1.00677	52	1		--
				20	1.00731			20	1	51.75	1		--						20	1.01362			20	1	51.5	1		--						20	1.0191			6.5	1.0063	51.75	1		--
				19.5	1.00713			19.5	1	51.5	1		--						19.5	1.01327			19.5	1	51.25	1		--						19.5	1.01861			6	1.00583	51.5	1		--
				19	1.00694			19	1	51.25	1		--						19	1.01292			19	1	51	1		--						19	1.01813			5.5	1.00535	51.25	1		--
				18.5	1.00675			18.5	1	51	1		--						18.5	1.01257			18.5	1	50.75	1		--						18.5	1.01764			5	1.00488	51	1		--
				18	1.00656			18	1	50.75	1		--						18	1.01222			18	1	50.5	1		--						18	1.01716			4.5	1.0044	50.75	1		--
				17.5	1.00638			17.5	1	50.5	1		--						17.5	1.01188			17.5	1	50.25	1		--						17.5	1.01668			4	1.00392	50.5	1		--
				17	1.00619			17	1	50.25	1		--						17	1.01153			17	1	50	1		--						17	1.0162			3.5	1.00344	50.25	1		--
				16.5	1.00601			16.5	1	50	1		--						16.5	1.01119			16.5	1	49.75	1		--						16.5	1.01572			3	1.00296	50	1		--
				16	1.00582			16	1	49.75	1		--						16	1.01085			16	1	49.5	1		--						16	1.01524			2.5	1.00248	49.75	1		--
				15.5	1.00564			15.5	1	49.5	1		--						15.5	1.01051			15.5	1	49.25	1		--						15.5	1.01476			2	1.00199	49.5	1		--
				15	1.00545			15	1	49.25	1		--						15	1.01017			15	1	49	1		--						15	1.01429			1.5	1.0015	49.25	1		--
				14.5	1.00527			14.5	1	49	1		--						14.5	1.00983			14.5	1	48.75	1		--						14.5	1.01381			1	1.001	49	1		--
				14	1.00509			14	1	48.75	1		--						14	1.00949			14	1	48.5	1		--						14	1.01334			0.5	1.0005	48.75	1		--
				13.5	1.00491			13.5	1	48.5	1		--						13.5	1.00916			13.5	1	48.25	1		--						13.5	1.01287			0.1	1.0001	48.5	1		--
				13	1.00473			13	1	48.25	1		--						13	1.00882			13	1	48	1		--						13	1.0124			--		48.25	1		--
				12.5	1.00455			12.5	1	48	1		--						12.5	1.00848			12.5	1	47.75	1		--						12.5	1.01193					48	1		--
				12	1.00437			12	1	47.75	1		--						12	1.00815			12	1	47.5	1		--						12	1.01146					47.75	1		--
				11.5	1.00419			11.5	1	47.5	1		--						11.5	1.00781			11.5	1	47.25	1		--						11.5	1.01099					47.5	1		--
				11	1.00401			11	1	47.25	1		--						11	1.00748			11	1	47	1		--						11	1.01052					47.25	1		--
				10.5	1.00383			10.5	1	47	1		--						10.5	1.00715			10.5	1	46.75	1		--						10.5	1.01005					47	1		--
				10	1.00365			10	1	46.75	1		--						10	1.00681			10	1	46.5	1		--						10	1.00958					46.75	1		--
				9.5	1.00347			9.5	1	46.5	1		--						9.5	1.00648			9.5	1	46.25	1		--						9.5	1.00911					46.5	1		--
				9	1.00329			9	1	46.25	1		--						9	1.00614			9	1	46	1		--						9	1.00865					46.25	1		--
				8.5	1.00311			8.5	1	46	1		--						8.5	1.00581			8.5	1	45.75	1		--						8.5	1.00818					46	1		--
				8	1.00293			8	1	45.75	1		--						8	1.00548			8	1	45.5	1		--						8	1.00771					45.75	1		--
				7.5	1.00275			7.5	1	45.5	1		--						7.5	1.00514			7.5	1	45.25	1		--						7.5	1.00724					45.5	1		--
				7	1.00257			7	1	45.25	1		--						7	1.00481			7	1	45	1		--						7	1.00677					45.25	1		--
				6.5	1.00239			6.5	1	45	1		--						6.5	1.00447			6.5	1	44.75	1		--						6.5	1.0063					45	1		--
				6	1.00221			6	1	44.75	1		--						6	1.00414			6	1	44.5	1		--						6	1.00583					44.75	1		--
				5.5	1.00203			5.5	1	44.5	1		--						5.5	1.0038			5.5	1	44.25	1		--						5.5	1.00535					44.5	1		--
				5	1.00185			5	1	44.25	1		--						5	1.00346			5	1	44	1		--						5	1.00488					44.25	1		--
				4.5	1.00167			4.5	1	44	1		--						4.5	1.00312	--	--	4.5	1	43.75	1		--						4.5	1.0044					44	1		--
				4	1.00149			4	1	43.75	1		--						4	1.00278	--	--	4	1	43.5	1		--						4	1.00392					43.75	1		--
				3.5	1.0013			3.5	1	43.5	1		--						3.5	1.00244	--	--	3.5	1	43.25	1		--						3.5	1.00344					43.5	1		--
				3	1.00112			3	1	43.25	1		--						3	1.0021	--	--	3	1	43	1		--						3	1.00296					43.25	1		--
				2.5	1.00094			2.5	1	43	1		--						2.5	1.00176	--	--	2.5	1	42.75	1		--						2.5	1.00248					43	1		--
				2	1.00075			2	1	42.75	1		--						2	1.00141	--	--	2	1	42.5	1		--						2	1.00199					42.75	1		--
				1.5	1.00057			1.5	1	42.5	1		--						1.5	1.00106	--	--	1.5	1	42.25	1		--						1.5	1.0015					42.5	1		--
				1	1.00038			1	1	42.25	1		--						1	1.00071	--	--	1	1	42	1		--						1	1.001					42.25	1		--
				0.5	1.00019			0.5	1	42	1		--						0.5	1.00036	--	--	0.5	1	41.75	1		--						0.5	1.0005					42	1		--
				0.1	1.00004			0.1	1	41.75	1		--						0.1	1.00007	--	--	0.1	1	41.5	1		--						0.1	1.0001					41.75	1		--
				--	--					41.5	1		--						--	--	--	--			41.25	1		--						--	--					41.5	1		--
										41.25	1		--								--	--			41	1		--												41.25	1		--
										41	1		--								--	--			40.75	1		--												41	1		--
										40.75	1		--								--	--			40.5	1		--												40.75	1		--
										40.5	1		--								--	--			40.25	1		--												40.5	1		--
										40.25	1		--								--	--			40	1		--												40.25	1		--
										40	1		--								--	--			39.75	1		--												40	1		--
										39.75	1		--								--	--			39.5	1		--												39.75	1		--
										39.5	1		--								--	--			39.25	1		--												39.5	1		--
										39.25	1		--								--	--			39	1		--												39.25	1		--
										39	1		--								--	--			38.75	1		--												39	1		--
										38.75	1		--								--	--			38.5	1		--												38.75	1		--
										38.5	1		--								--	--			38.25	1		--												38.5	1		--
										38.25	1		--								--	--			38	1		--												38.25	1		--
										38	1		--								--	--			37.75	1		--												38	1		--
										37.75	1		--								--	--			37.5	1		--												37.75	1		--
										37.5	1		--								--	--			37.25	1		--												37.5	1		--
										37.25	1		--								--	--			37	1		--												37.25	1		--
										37	1		--								--	--			36.75	1		--												37	1		--
										36.75	1		--								--	--			36.5	1		--												36.75	1		--
										36.5	1		--								--	--			36.25	1		--												36.5	1		--
										36.25	1		--								--	--			36	1		--												36.25	1		--
										36	1		--								--	--			35.75	1		--												36	1		--
										35.75	1		--												35.5	1		--												35.75	1		--
										35.5	1		--												35.25	1		--												35.5	1		--
										35.25	1		--												35	1		--												35.25	1		--
										35	1		--												34.75	1		--												35	1		--
										34.75	1		--												34.5	1		--												34.75	1		--
										34.5	1		--												34.25	1		--												34.5	1		--
										34.25	1		--												34	1		--												34.25	1		--
										34	1		--												33.75	1		--												34	1		--
										33.75	1		--												33.5	1		--												33.75	1		--
										33.5	1		--												33.25	1		--												33.5	1		--
										33.25	1		--												33	1		--												33.25	1		--
										33	1		--												32.75	1		--												33	1		--
										32.75	1		--												32.5	1		--												32.75	1		--
										32.5	1		--												32.25	1		--												32.5	1		--
										32.25	1		--												32	1		--												32.25	1		--
										32	1		--												31.75	1		--												32	1		--
										31.75	1		--												31.5	1		--												31.75	1		--
										31.5	1		--												31.25	1		--												31.5	1		--
										31.25	1		--												31	1		--												31.25	1		--
										31	1		--												30.75	1		--												31	1		--
										30.75	1		--												30.5	1		--												30.75	1		--
										30.5	1		--												30.25	1		--												30.5	1		--
										30.25	1		--												30	1		--												30.25	1		--
										30	1		--												29.75	1		--												30	1		--
										29.75	1		--												29.5	1		--												29.75	1		--
										29.5	1		--												29.25	1		--												29.5	1		--
										29.25	1		--												29	1		--												29.25	1		--
										29	1		--												28.75	1		--												29	1		--
										28.75	1		--												28.5	1		--												28.75	1		--
										28.5	1		--												28.25	1		--												28.5	1		--
										28.25	1		--												28	1		--												28.25	1		--
										28	1		--												27.75	1		--												28	1		--
										27.75	1		--												27.5	1		--												27.75	1		--
										27.5	1		--												27.25	1		--												27.5	1		--
										27.25	1		--												27	1		--												27.25	1		--
										27	1		--												26.75	1		--												27	1		--
										26.75	1		--												26.5	1		--												26.75	1		--
										26.5	1		--												26.25	1		--												26.5	1		--
										26.25	1		--												26	1		--												26.25	1		--
										26	1		--												25.75	1		--												26	1		--
										25.75	1		--												25.5	1		--												25.75	1		--
										25.5	1		--												25.25	1		--												25.5	1		--
										25.25	1		--												25	1		--												25.25	1		--
										25	1		--												24.75	1		--												25	1		--
										24.75	1		--												24.5	1		--												24.75	1		--
										24.5	1		--												24.25	1		--												24.5	1		--
										24.25	1		--												24	1		--												24.25	1		--
										24	1		--												23.75	1		--												24	1		--
										23.75	1		--												23.5	1		--												23.75	1		--
										23.5	1		--												23.25	1		--												23.5	1		--
										23.25	1		--												23	1		--												23.25	1		--
										23	1		--												22.75	1		--												23	1		--
										22.75	1		--												22.5	1		--												22.75	1		--
										22.5	1		--												22.25	1		--												22.5	1		--
										22.25	1		--												22	1		--												22.25	1		--
										22	1		--												21.75	1		--												22	1		--
										21.75	1		--												21.5	1		--												21.75	1		--
										21.5	1		--												21.25	1		--												21.5	1		--
										21.25	1		--												21	1		--												21.25	1		--
										21	1		--												20.75	1		--												21	1		--
										20.75	1		--												20.5	1		--												20.75	1		--
										20.5	1		--												20.25	1		--												20.5	1		--
										20.25	1		--												20	1		--												20.25	1		--
										20	1		--												19.75	1		--												20	1		--
										19.75	1		--												19.5	1		--												19.75	1		--
										19.5	1		--												19.25	1		--												19.5	1		--
										19.25	1		--												19	1		--												19.25	1		--
										19	1		--												18.75	1		--												19	1		--
										18.75	1		--												18.5	1		--												18.75	1		--
										18.5	1		--												18.25	1		--												18.5	1		--
										18.25	1		--												18	1		--												18.25	1		--
										18	1		--												17.75	1		--												18	1		--
										17.75	1		--												17.5	1		--												17.75	1		--
										17.5	1		--												17.25	1		--												17.5	1		--
										17.25	1		--												17	1		--												17.25	1		--
										17	1		--												16.75	1		--												17	1		--
										16.75	1		--												16.5	1		--												16.75	1		--
										16.5	1		--												16.25	1		--												16.5	1		--
										16.25	1		--												16	1		--												16.25	1		--
										16	1		--												15.75	1		--												16	1		--
										15.75	1		--												15.5	1		--												15.75	1		--
										15.5	1		--												15.25	1		--												15.5	1		--
										15.25	1		--												15	1		--												15.25	1		--
										15	1		--												14.75	1		--												15	1		--
										14.75	1		--												14.5	1		--												14.75	1		--
										14.5	1		--												14.25	1		--												14.5	1		--
										14.25	1		--												14	1		--												14.25	1		--
										14	1		--												13.75	1		--												14	1		--
										13.75	1		--												13.5	1		--												13.75	1		--
										13.5	1		--												13.25	1		--												13.5	1		--
										13.25	1		--												13	1		--												13.25	1		--
										13	1		--												12.75	1		--												13	1		--
										12.75	1		--												12.5	1		--												12.75	1		--
										12.5	1		--												12.25	1		--												12.5	1		--
										12.25	1		--												12	1		--												12.25	1		--
										12	1		--												11.75	1		--												12	1		--
										11.75	1		--												11.5	1		--												11.75	1		--
										11.5	1		--												11.25	1		--												11.5	1		--
										11.25	1		--												11	1		--												11.25	1		--
										11	1		--												10.75	1		--												11	1		--
										10.75	1		--												10.5	1		--												10.75	1		--
										10.5	1		--												10.25	1		--												10.5	1		--
										10.25	1		--												10	1		--												10.25	1		--
										10	1		--												9.75	1		--												10	1		--
										9.75	1		--												9.5	1		--												9.75	1		--
										9.5	1		--												9.25	1		--												9.5	1		--
										9.25	1		--												9	1		--												9.25	1		--
										9	1		--												8.75	1		--												9	1		--
										8.75	1		--												8.5	1		--												8.75	1		--
										8.5	1		--												8.25	1		--												8.5	1		--
										8.25	1		--												8	1		--												8.25	1		--
										8	1		--												7.75	1		--												8	1		--
										7.75	1		--												7.5	1		--												7.75	1		--
										7.5	1		--												7.25	1		--												7.5	1		--
										7.25	1		--												7	1		--												7.25	1		--
										7	1		--												6.75	1		--												7	1		--
										6.75	1		--												6.5	1		--												6.75	1		--
										6.5	1		--												6.25	1		--												6.5	1		--
										6.25	1		--												6	1		--												6.25	1		--
										6	1		--												5.75	1		--												6	1		--
										5.75	1		--												5.5	1		--												5.75	1		--
										5.5	1		--												5.25	1		--												5.5	1		--
										5.25	1		--												5	1		--												5.25	1		--
										5	1		--												4.75	1		--												5	1		--
										4.75	1		--												4.5	1		--												4.75	1		--
										4.5	1		--												4.25	1		--												4.5	1		--
										4.25	1		--												4	1		--												4.25	1		--
										4	1		--												3.75	1		--												4	1		--
										3.75	1		--												3.5	1		--												3.75	1		--
										3.5	1		--												3.25	1		--												3.5	1		--
										3.25	1		--												3	1		--												3.25	1		--
										3	1		--												2.75	1		--												3	1		--
										2.75	1		--												2.5	1		--												2.75	1		--
										2.5	1		--												2.25	1		--												2.5	1		--
										2.25	1		--												2	1		--												2.25	1		--
										2	1		--												1.75	1		--												2	1		--
										1.75	1		--												1.5	1		--												1.75	1		--
										1.5	1		1.00963												1.25	1		--												1.5	1		--
										1.25	1		1.00963												1	1		--												1.25	1		--
										1	1		1.00963												0.75	1		--												1	1		--
										0.75	1		1.00963												0.5	1		--												0.75	1
										0.5	1		1.00963															--												0.5	1

## Sheet: Ammonium sulfate+humic acid 
Ammonium sulfate+humic acid by mass ratio of 1:1				Ammonium sulfate+humic acid by mass ratio of 3:1			Ammonium sulfate+humic acid by mass ratio of 1:3			ZSR relation
AS	measured GF	--		--			--			RH
RH										99	3.17614	3.41352	2.99116
90	1.54	1.5	0.02	1.64	1.5	0.02	1.47	1.5	0.02	98.75	2.94158	3.15483	2.7761
85	1.41	1.5	0.02	1.54	1.5	0.02	1.37	1.5	0.02	98.5	2.76392	2.95922	2.6129
80	1.32	1.5	0.02	1.45	1.5	0.02	1.28	1.5	0.02	98.25	2.62311	2.80446	2.48326
75	1.26	1.5	0.02	1.37	1.5	0.02	1.18	1.5	0.02	98	2.50786	2.67807	2.3769
70	1.2	1.5	0.02	1.32	1.5	0.02	1.15	1.5	0.02	97.5	2.32871	2.48227	2.21099
65	1.17	1.5	0.02	1.29	1.5	0.02	1.13	1.5	0.02	97	2.19438	2.33617	2.08595
60	1.15	1.5	0.02	1.22	1.5	0.02	1.12	1.5	0.02	96.5	2.0889	2.22201	1.98727
55	1.14	1.5	0.02	1.19	1.5	0.02	1.1	1.5	0.02	96	2.0033	2.12981	1.90681
50	1.11	1.5	0.02	1.16	1.5	0.02	1.08	1.5	0.02	95.5	1.93206	2.05343	1.83956
45	1.09	1.5	0.02	1.14	1.5	0.02	1.07	1.5	0.02	95	1.87161	1.98887	1.78228
40	1.07	1.5	0.02	1.12	1.5	0.02	1.05	1.5	0.02	94.5	1.81949	1.9334	1.73271
35	1.05	1.5	0.02	1.1	1.5	0.02	1.05	1.5	0.02	94	1.77396	1.88509	1.68928
30	1	1.5	0.02	1	1.5	0.02	1.03	1.5	0.02	93.5	1.73374	1.84254	1.65083
25	1	1.5	0.02	1	1.5	0.02	1.02	1.5	0.02	93	1.69789	1.80469	1.61647
20	1	1.5	0.02	1	1.5	0.02	1.02	1.5	0.02	92.5	1.66566	1.77074	1.58554
15	1	1.5	0.02	1	1.5	0.02	1.01	1.5	0.02	92	1.63649	1.74004	1.55749
10	1	1.5	0.02	1	1.5	0.02	1.01	1.5	0.02	91.5	1.60993	1.71213	1.53193
5	1	1.5	0.02	1	1.5	0.02	1	1.5	0.02	91	1.5856	1.68658	1.5085
										90.5	1.56322	1.6631	1.48694
										90	1.54254	1.64141	1.467
										89.5	1.52334	1.62127	1.4485
										89	1.50548	1.60254	1.43128
										88.5	1.48879	1.58503	1.4152
										88	1.47316	1.56862	1.40014
										87.5	1.45848	1.5532	1.38601
										87	1.44466	1.53866	1.37271
										86.5	1.43161	1.52493	1.36017
										86	1.41927	1.51193	1.34832
										85.5	1.40757	1.4996	1.3371
										85	1.39647	1.48788	1.32647
										84.5	1.38592	1.47671	1.31637
										84	1.37586	1.46606	1.30676
										83.5	1.36626	1.45589	1.29761
										83	1.3571	1.44615	1.28888
										82.5	1.34834	1.43683	1.28054
										82	1.33994	1.42788	1.27257
										81.5	1.3319	1.41928	1.26495
										81	1.32417	1.41101	1.25764
										80.5	1.31675	1.40305	1.25063
										80	1.30961	1.39538	1.24391
										79.5	1.30273	1.38797	1.23744
										79	1.2961	1.38083	1.23123
										78.5	1.28972	1.37392	1.22525
										78	1.28355	1.36724	1.21949
										77.5	1.27759	1.36076	1.21393
										77	1.27183	1.35449	1.20858
										76.5	1.26626	1.3484	1.20341
										76	1.26086	1.3425	1.19842
										75.5	1.25563	1.33677	1.19359
										75	1.25057	1.3312	1.18893
										74.5	1.24566	1.32578	1.18442
										74	1.24089	1.32051	1.18005
										73.5	1.23626	1.31538	1.17582
										73	1.23176	1.31038	1.17173
										72.5	1.22739	1.30551	1.16775
										72	1.22313	1.30076	1.1639
										71.5	1.219	1.29612	1.16016
										71	1.21497	1.29159	1.15653
										70.5	1.21105	1.28718	1.15301
										70	1.20722	1.28286	1.14959
										69.5	1.20349	1.27864	1.14626
										69	1.19986	1.27451	1.14303
										68.5	1.19632	1.27047	1.13988
										68	1.19286	1.26652	1.13682
										67.5	1.18948	1.26265	1.13385
										67	1.18618	1.25885	1.13094
										66.5	1.18296	1.25514	1.12812
										66	1.1798	1.25149	1.12537
										65.5	1.17672	1.24792	1.12269
										65	1.17371	1.24442	1.12008
										64.5	1.17077	1.24098	1.11753
										64	1.16788	1.2376	1.11505
										63.5	1.16505	1.23428	1.11262
										63	1.16229	1.23102	1.11026
										62.5	1.15958	1.22782	1.10795
										62	1.15693	1.22467	1.1057
										61.5	1.15433	1.22158	1.1035
										61	1.15178	1.21854	1.10135
										60.5	1.14928	1.21554	1.09925
										60	1.14683	1.2126	1.0972
										59.5	1.14442	1.2097	1.0952
										59	1.14206	1.20684	1.09324
										58.5	1.13974	1.20402	1.09132
										58	1.13747	1.20125	1.08945
										57.5	1.13523	1.19852	1.08761
										57	1.13304	1.19583	1.08582
										56.5	1.13088	1.19318	1.08407
										56	1.12876	1.19055	1.08235
										55.5	1.12667	1.18797	1.08067
										55	1.12463	1.18543	1.07902
										54.5	1.12261	1.18291	1.07741
										54	1.12063	1.18043	1.07583
										53.5	1.11867	1.17797	1.07428
										53	1.11676	1.17555	1.07277
										52.5	1.11486	1.17316	1.07128
										52	1.113	1.17079	1.06983
										51.5	1.11117	1.16845	1.0684
										51	1.10937	1.16614	1.067
										50.5	1.10759	1.16386	1.06563
										50	1.10584	1.1616	1.06428
										49.5	1.10411	1.15936	1.06296
										49	1.10241	1.15715	1.06167
										48.5	1.10073	1.15496	1.0604
										48	1.09907	1.15279	1.05915
										47.5	1.09744	1.15065	1.05793
										47	1.09583	1.14852	1.05673
										46.5	1.09424	1.14642	1.05555
										46	1.09267	1.14433	1.05439
										45.5	1.09112	1.14227	1.05326
										45	1.0896	1.14022	1.05214
										44.5	1.08808	1.13818	1.05104
										44	1.08659	1.13617	1.04997
										43.5	1.08512	1.13418	1.04891
										43	1.08367	1.1322	1.04787
										42.5	1.08223	1.13023	1.04685
										42	1.08081	1.12828	1.04584
										41.5	1.0794	1.12635	1.04486
										41	1.07801	1.12442	1.04388
										40.5	1.07664	1.12251	1.04293
										40	1.07528	1.12062	1.04199
										39.5	1.07393	1.11874	1.04107
										39	1.07261	1.11687	1.04016
										38.5	1.07129	1.11502	1.03927
										38	1.06999	1.11317	1.03839
										37.5	1.0687	1.11134	1.03752
										37	1.06742	1.10952	1.03667
										36.5	1.06617	1.10771	1.03584
										36	1.06492	1.10592	1.03501
										35.5	1.06368	1.10413	1.0342
										35	1.06246	1.10236	1.03341
										34.5	1.06125	1.1006	1.03262
										34	1.00716	1.00443	1.00902
										33.5	1.00687	1.00425	1.00866
										33	1.00659	1.00407	1.0083
										32.5	1.00632	1.0039	1.00796
										32	1.00605	1.00374	1.00762
										31.5	1.00579	1.00358	1.0073
										31	1.00554	1.00342	1.00698
										30.5	1.0053	1.00327	1.00668
										30	1.00506	1.00312	1.00638
										29.5	1.00483	1.00298	1.00609
										29	1.00461	1.00285	1.00581
										28.5	1.00439	1.00271	1.00554
										28	1.00418	1.00258	1.00527
										27.5	1.00398	1.00246	1.00502
										27	1.00379	1.00234	1.00477
										26.5	1.0036	1.00222	1.00453
										26	1.00341	1.00211	1.0043
										25.5	1.00323	1.002	1.00408
										25	1.00306	1.00189	1.00386
										24.5	1.0029	1.00179	1.00365
										24	1.00274	1.00169	1.00345
										23.5	1.00258	1.00159	1.00325
										23	1.00243	1.0015	1.00307
										22.5	1.00229	1.00141	1.00288
										22	1.00215	1.00132	1.00271
										21.5	1.00201	1.00124	1.00254
										21	1.00189	1.00116	1.00238
										20.5	1.00176	1.00109	1.00222
										20	1.00164	1.00101	1.00207
										19.5	1.00153	1.00094	1.00193
										19	1.00142	1.00088	1.00179
										18.5	1.00131	1.00081	1.00166
										18	1.00121	1.00075	1.00153
										17.5	1.00112	1.00069	1.00141
										17	1.00103	1.00063	1.00129
										16.5	1.00094	1.00058	1.00118
										16	1.00086	1.00053	1.00108
										15.5	1.00078	1.00048	1.00098
										15	1.0007	1.00043	1.00088
										14.5	1.00063	1.00039	1.00079
										14	1.00056	1.00035	1.00071
										13.5	1.0005	1.00031	1.00063
										13	1.00044	1.00027	1.00055
										12.5	1.00038	1.00024	1.00048
										12	1.00033	1.0002	1.00042
										11.5	1.00028	1.00017	1.00035
										11	1.00024	1.00014	1.0003
										10.5	1.00019	1.00012	1.00024
										10	1.00015	1.00009	1.00019
										9.5	1.00012	1.00007	1.00015
										9	1.00009	1.00005	1.00011
										8.5	1.00006	1.00004	1.00007
										8	1.00003	1.00002	1.00004
										7.5	1.00001	1.00001	1.00001
										7	0.99999	0.99999	0.99999
										6.5	0.99997	0.99998	0.99996
										6	0.99996	0.99997	0.99995
										5.5	0.99995	0.99997	0.99993
										5	0.99994	0.99996	0.99992
										4.5	0.99993	0.99996	0.99991
										4	0.99993	0.99996	0.99991
										3.5	0.99993	0.99996	0.99991
										3	0.99993	0.99996	0.99991
										2.5	0.99994	0.99996	0.99992
										2	0.99994	0.99997	0.99993
										1.5	0.99995	0.99997	0.99994
										1	0.99997	0.99998	0.99996
										0.5	0.99998	0.99999	0.99998
										--	--	--	--
										--	--	--	--
										--	--	--	--
										--	--	--	--
										--	--	--	--
										--	--	--	--
										--	--	--	--
										--	--	--	--
										--	--	--	--
										--	--	--	--
										--	--	--	--
										--	--	--	--
										--	--	--	--
										--	--	--	--
										--	--	--	--
										--	--	--	--
										--	--	--	--
										--	--	--	--
										--	--	--	--
										--	--	--	--
										--	--	--	--
										--	--	--	--
										--	--	--	--
										--	--	--	--
										--	--	--	--
										--	--	--	--
										--	--	--	--
										--	--	--	--
										--	--	--	--
										--	--	--	--
										--	--	--	--
										--	--	--	--
										--	--	--	--
										--	--	--	--
										--	--	--	--
										--	--	--	--
										--	--	--	--
										--	--	--	--
										--	--	--	--
										--	--	--	--
										--	--	--	--
										--	--	--	--
										--	--	--	--
										--	--	--	--
										--	--	--	--
										--	--	--	--
										--	--	--	--
										--	--	--	--
										--	--	--	--
										--	--	--	--
										--	--	--	--
										--	--	--	--
										--	--	--	--
										--	--	--	--
										--	--	--	--
										--	--	--	--
										--	--	--	--
										--	--	--	--
										--	--	--	--
										--	--	--	--
										--	--	--	--
										--	--	--	--
										--	--	--	--
										--	--	--	--
										--	--	--	--
										--	--	--	--
										--	--	--	--
										--	--	--	--
										--	--	--	--
										--	--	--	--
										--	--	--	--
										--	--	--	--
										--	--	--	--
										--	--	--	--
										--	--	--	--
										--	--	--	--
										--	--	--	--
										--	--	--	--
										--	--	--	--
										--	--	--	--
										--	--	--	--
										--	--	--	--
										--	--	--	--
										--	--	--	--
										--	--	--	--
										--	--	--	--
										--	--	--	--
										--	--	--	--
										--	--	--	--
										--	--	--	--
										--	--	--	--
										--	--	--	--
										--	--	--	--
										--	--	--	--
										--	--	--	--
										--	--	--	--
										--	--	--	--
										--	--	--	--
										--	--	--	--
										--	--	--	--
										--	--	--	--
										--	--	--	--
										--	--	--	--
										--	--	--	--
										--	--	--	--
										--	--	--	--
										--	--	--	--
										--	--	--	--
										--	--	--	--
										--	--	--	--
										--	--	--	--
										--	--	--	--
										--	--	--	--
										--	--	--	--
										--	--	--	--
										--	--	--	--
										--	--	--	--
										--	--	--	--
										--	--	--	--
										--	--	--	--
										--	--	--	--
										--	--	--	--
										--	--	--	--
										--	--	--	--
										--	--	--	--
										--	--	--	--
										--	--	--	--
										--	--	--	--
										--	--	--	--
										--	--	--	--
										--	--	--	--
										--	--	--	--
										--	--	--	--
										--	--	--	--
										--	--	--	--
										--	--	--	--
										--	--	--	--
										--	--	--	--
										--	--	--	--
										--	--	--	--
										--	--	--	--
										--	--	--	--
										--	--	--	--
										--	--	--	--
										--	--	--	--
										--	--	--	--
										--	--	--	--
										--	--	--	--
										--	--	--	--
										--	--	--	--
										--	--	--	--
										--	--	--	--
										--	--	--	--
										--	--	--	--
										--	--	--	--
										--	--	--	--
										--	--	--	--
										--	--	--	--
										--	--	--	--
										--	--	--	--
										--	--	--	--
										--	--	--	--
										--	--	--	--
										--	--	--	--
										--	--	--	--
										--	--	--	--
										--	--	--	--
										--	--	--	--
										--	--	--	--
										--	--	--	--
										--	--	--	--
										--	--	--	--
										--	--	--	--
										--	--	--	--
										--	--	--	--
										--	--	--	--
										--	--	--	--
										--	--	--	--
										--	--	--	--
										--	--	--	--
										--	--	--	--
										--	--	--	--
										--	--	--	--
										--	--	--	--
										--	--	--	--
										--	--	--	--
										--	--	--	--
										--	--	--	--
										--	--	--	--
										--	--	--	--
										--	--	--	--
										--	--	--	--
										--	--	--	--
										--	--	--	--
										--	--	--	--
										--	--	--	--
										--	--	--	--
										--	--	--	--
										--	--	--	--

## Sheet: hygroscopicity prameter
hygroscopicity parameter at dry season					hygroscopicity parameter at wet season				prediction in the dry season			prediction in th wet season
RHdry	k				measured RH	wet			RH		--	RH		CCN in dry season					CCN in the wet season
12.3832	0	0.02899	0.01211		10.3832	0	0.02899	0.01211	99	0.19677	--	99	0.17672	100	0.1851	0	0.04	--	100	0.1837	0	0.035
90.0178	0.16376	0.05084	0.01189		89.0178	0.12376	0.05084	0.01189	98.75	0.18407	--	98.75	0.16459	90	0.09949	0.05084	0.06102	--	90	0.14501	0.05084	0.05778
85.0645	0.16555	0.27688	0.01162		84.9645	0.13055	0.27688	0.01162	98.5	0.17526	--	98.5	0.15611	--	--	--	--
79.878	0.1635	0.04095	0.01373		79.878	0.13501	0.04095	0.01373	98.25	0.16882	--	98.25	0.14986	--	--	--	--
75.1401	0.17553	0.45997	0.01231		75.0401	0.14553	0.45997	0.01231	98	0.16394	--	98	0.14508	--	--	--	--
69.9098	0.17901	0.21872	0.01189		69.991	0.14901	0.21872	0.01189	97.75	0.16016	--	97.75	0.14133	--	--	--	--
65.1613	0.18144	0.41222	0.01118		64.9613	0.14144	0.41222	0.01118	97.5	0.15718	--	97.5	0.13833	--	--	--	--
59.9153	0.1872	0.12074	0.01275		59.9153	0.1402	0.12074	0.01275	97.25	0.15479	--	97.25	0.13591	--	--	--	--
54.8759	0.18862	0.31055	0.01206		54.9759	0.14062	0.31055	0.01206	97	0.15287	--	97	0.13392	--	--	--	--
45.1613	0.18641	0.41222	0.01118		45.0061	0.14844	0.41222	0.01118	96.75	0.15132	--	96.75	0.13228	--	--	--	--
50.9153	0.1882	0.12074	0.01275		49.9153	0.1472	0.12074	0.01275	96.5	0.15007	--	96.5	0.13091	--	--	--	--
42.8759	0.18906	0.31055	0.01206		41.0759	0.14906	0.31055	0.01206	96.25	0.14905	--	96.25	0.12978	--	--	--	--
--	--	--	--		--	--	--	--	96	0.14824	--	96	0.12884	--	--	--	--
--	--	--	--		--	--	--	--	95.75	0.14759	--	95.75	0.12806	--	--	--	--
--	--	--	--		--	--	--	--	95.5	0.14709	--	95.5	0.12742	--	--	--	--
--	--	--	--		--	--	--	--	95.25	0.14671	--	95.25	0.12689	--	--	--	--
		--	--		--	--	--	--	95	0.14643	--	95	0.12646	--	--	--	--
		--	--		--	--	--	--	94.75	0.14624	--	94.75	0.12611	--	--	--	--
		--	--				--	--	94.5	0.14613	--	94.5	0.12584	--	--	--	--
		--	--				--	--	94.25	0.14609	--	94.25	0.12564	--	--	--	--
		--	--				--	--	94	0.14611	--	94	0.12549	--	--	--	--
		--	--				--	--	93.75	0.14618	--	93.75	0.12539	--	--	--	--
		--	--				--	--	93.5	0.1463	--	93.5	0.12534	--	--	--	--
		--	--				--	--	93.25	0.14646	--	93.25	0.12533	--	--	--	--
		--	--				--	--	93	0.14666	--	93	0.12536	--	--	--	--
		--	--				--	--	92.75	0.14689	--	92.75	0.12542	--	--	--	--
		--	--				--	--	92.5	0.14715	--	92.5	0.1255	--	--	--	--
		--	--				--	--	92.25	0.14744	--	92.25	0.12561	--	--	--	--
		--	--				--	--	92	0.14776	--	92	0.12575	--	--	--	--
		--	--				--	--	91.75	0.14809	--	91.75	0.1259	--	--	--	--
--	--	--	--		--	--	--	--	91.5	0.14845	--	91.5	0.12608	--	--
--	--	--	--		--	--	--	--	91.25	0.14882	--	91.25	0.12627
									91	0.14921	--	91	0.12648
									90.75	0.14961	--	90.75	0.1267
									90.5	0.15002	--	90.5	0.12694
									90.25	0.15045	--	90.25	0.12718
									90	0.15089	--	90	0.12744
									89.75	0.15134	--	89.75	0.12771
									89.5	0.15179	--	89.5	0.12798
									89.25	0.15226	--	89.25	0.12826
									89	0.15273	--	89	0.12856
									88.75	0.15321	--	88.75	0.12885
									88.5	0.15369	--	88.5	0.12916
									88.25	0.15418	--	88.25	0.12946
									88	0.15467	--	88	0.12978
									87.75	0.15517	--	87.75	0.13009
									87.5	0.15567	--	87.5	0.13041
									87.25	0.15617	--	87.25	0.13074
									87	0.15668	--	87	0.13106
									86.75	0.15719	--	86.75	0.1314
									86.5	0.1577	--	86.5	0.13173
									86.25	0.15821	--	86.25	0.13206
									86	0.15872	--	86	0.1324
									85.75	0.15924	--	85.75	0.13274
									85.5	0.15975	--	85.5	0.13307
									85.25	0.16027	--	85.25	0.13341
									85	0.16078	--	85	0.13375
									84.75	0.1613	--	84.75	0.1341
									84.5	0.16182	--	84.5	0.13443
									84.25	0.16233	--	84.25	0.13478
									84	0.16285	--	84	0.13512
									83.75	0.16336	--	83.75	0.13546
									83.5	0.16388	--	83.5	0.1358
									83.25	0.16439	--	83.25	0.13614
									83	0.1649	--	83	0.13648
									82.75	0.16541	--	82.75	0.13682
									82.5	0.16592	--	82.5	0.13716
									82.25	0.16643	--	82.25	0.13749
									82	0.16693	--	82	0.13783
									81.75	0.16744	--	81.75	0.13817
									81.5	0.16794	--	81.5	0.1385
									81.25	0.16844	--	81.25	0.13883
									81	0.16894	--	81	0.13916
									80.75	0.16943	--	80.75	0.13949
									80.5	0.16993	--	80.5	0.13982
									80.25	0.17042	--	80.25	0.14015
									80	0.17091	--	80	0.14047
									79.75	0.17139	--	79.75	0.1408
									79.5	0.17188	--	79.5	0.14112
									79.25	0.17236	--	79.25	0.14144
									79	0.17284	--	79	0.14175
									78.75	0.17332	--	78.75	0.14207
									78.5	0.17379	--	78.5	0.14238
									78.25	0.17426	--	78.25	0.14269
									78	0.17473	--	78	0.143
									77.75	0.17519	--	77.75	0.14331
									77.5	0.17566	--	77.5	0.14362
									77.25	0.17612	--	77.25	0.14392
									77	0.17657	--	77	0.14422
									76.75	0.17702	--	76.75	0.14451
									76.5	0.17747	--	76.5	0.14481
									76.25	0.17792	--	76.25	0.1451
									76	0.17837	--	76	0.1454
									75.75	0.1788	--	75.75	0.14568
									75.5	0.17924	--	75.5	0.14597
									75.25	0.17968	--	75.25	0.14625
									75	0.18011	--	75	0.14653
									74.75	0.18054	--	74.75	0.14681
									74.5	0.18096	--	74.5	0.14708
									74.25	0.18138	--	74.25	0.14735
									74	0.1818	--	74	0.14762
									73.75	0.18221	--	73.75	0.14789
									73.5	0.18262	--	73.5	0.14815
									73.25	0.18303	--	73.25	0.14842
									73	0.18343	--	73	0.14867
									72.75	0.18383	--	72.75	0.14893
									72.5	0.18422	--	72.5	0.14918
									72.25	0.18462	--	72.25	0.14943
									72	0.185	--	72	0.14968
									71.75	0.18539	--	71.75	0.14993
									71.5	0.18577	--	71.5	0.15016
									71.25	0.18615	--	71.25	0.1504
									71	0.18652	--	71	0.15064
									70.75	0.18689	--	70.75	0.15087
									70.5	0.18726	--	70.5	0.1511
									70.25	0.18762	--	70.25	0.15133
									70	0.18798	--	70	0.15155
									69.75	0.18834	--	69.75	0.15177
									69.5	0.18868	--	69.5	0.15199
									69.25	0.18903	--	69.25	0.1522
									69	0.18938	--	69	0.15242
									68.75	0.18972	--	68.75	0.15262
									68.5	0.19005	--	68.5	0.15283
									68.25	0.19039	--	68.25	0.15303
									68	0.19071	--	68	0.15323
									67.75	0.19104	--	67.75	0.15343
									67.5	0.19136	--	67.5	0.15362
									67.25	0.19167	--	67.25	0.15381
									67	0.19199	--	67	0.154
									66.75	0.1923	--	66.75	0.15419
									66.5	0.1926	--	66.5	0.15436
									66.25	0.1929	--	66.25	0.15454
									66	0.1932	--	66	0.15471
									65.75	0.1935	--	65.75	0.15489
									65.5	0.19378	--	65.5	0.15506
									65.25	0.19407	--	65.25	0.15522
									65	0.19435	--	65	0.15538
									64.75	0.19463	--	64.75	0.15554
									64.5	0.1949	--	64.5	0.1557
									64.25	0.19517	--	64.25	0.15585
									64	0.19544	--	64	0.156
									63.75	0.1957	--	63.75	0.15615
									63.5	0.19596	--	63.5	0.15629
									63.25	0.19621	--	63.25	0.15642
									63	0.19646	--	63	0.15656
									62.75	0.19671	--	62.75	0.1567
									62.5	0.19695	--	62.5	0.15683
									62.25	0.19718	--	62.25	0.15695
									62	0.19742	--	62	0.15708
									61.75	0.19764	--	61.75	0.15719
									61.5	0.19787	--	61.5	0.15731
									61.25	0.19809	--	61.25	0.15742
									61	0.19831	--	61	0.15754
									60.75	0.19852	--	60.75	0.15764
									60.5	0.19873	--	60.5	0.15774
									60.25	0.19893	--	60.25	0.15784
									60	0.19913	--	60	0.15794
									59.75	0.19933	--	59.75	0.15804
									59.5	0.19952	--	59.5	0.15813
									59.25	0.19971	--	59.25	0.15821
									59	0.19989	--	59	0.1583
									58.75	0.20008	--	58.75	0.15838
									58.5	0.20025	--	58.5	0.15845
									58.25	0.20042	--	58.25	0.15853
									58	0.20059	--	58	0.1586
									57.75	0.20075	--	57.75	0.15866
									57.5	0.20092	--	57.5	0.15874
									57.25	0.20107	--	57.25	0.15879
									57	0.20122	--	57	0.15885
									56.75	0.20137	--	56.75	0.15891
									56.5	0.20151	--	56.5	0.15895
									56.25	0.20165	--	56.25	0.159
									56	0.20178	--	56	0.15905
									55.75	0.20191	--	55.75	0.15908
									55.5	0.20203	--	55.5	0.15912
									55.25	0.20216	--	55.25	0.15916
									55	0.20227	--	55	0.15919
									54.75	0.20239	--	54.75	0.15921
									54.5	0.2025	--	54.5	0.15924
									54.25	0.2026	--	54.25	0.15926
									54	0.2027	--	54	0.15927
									53.75	0.2028	--	53.75	0.15929
									53.5	0.20289	--	53.5	0.1593
									53.25	0.20298	--	53.25	0.15931
									53	0.20306	--	53	0.1593
									52.75	0.20314	--	52.75	0.15931
									52.5	0.20322	--	52.5	0.15931
									52.25	0.20329	--	52.25	0.1593
									52	0.20336	--	52	0.15929
									51.75	0.20342	--	51.75	0.15928
									51.5	0.20348	--	51.5	0.15926
									51.25	0.20354	--	51.25	0.15924
									51	0.20358	--	51	0.15921
									50.75	0.20363	--	50.75	0.15918
									50.5	0.20368	--	50.5	0.15916
									50.25	0.20371	--	50.25	0.15912
									50	0.20374	--	50	0.15908
									49.75	0.20377	--	49.75	0.15904
									49.5	0.20379	--	49.5	0.15899
									49.25	0.20382	--	49.25	0.15895
									49	0.20384	--	49	0.1589
									48.75	0.20384	--	48.75	0.15884
									48.5	0.20385	--	48.5	0.15878
									48.25	0.20386	--	48.25	0.15873
									48	0.20386	--	48	0.15866
									47.75	0.20385	--	47.75	0.1586
									47.5	0.20383	--	47.5	0.15851
									47.25	0.20382	--	47.25	0.15844
									47	0.2038	--	47	0.15836
									46.75	0.20378	--	46.75	0.15827
									46.5	0.20376	--	46.5	0.1582
									46.25	0.20373	--	46.25	0.15811
									46	0.20369	--	46	0.15801
									45.75	0.20365	--	45.75	0.15791
									45.5	0.2036	--	45.5	0.15781
									45.25	0.20356	--	45.25	0.15771
									45	0.2035	--	45	0.1576
									44.75	0.20344	--	44.75	0.15748
									44.5	0.20339	--	44.5	0.15738
									44.25	0.20332	--	44.25	0.15725
									44	0.20325	--	44	0.15714
									43.75	0.20317	--	43.75	0.157
									43.5	0.2031	--	43.5	0.15688
									43.25	0.20301	--	43.25	0.15674
									43	0.20292	--	43	0.15661
									42.75	0.20284	--	42.75	0.15647
									42.5	0.20273	--	42.5	0.15632
									42.25	0.20263	--	42.25	0.15618
									42	0.20253	--	42	0.15603
									41.75	0.20242	--	41.75	0.15588
									41.5	0.2023	--	41.5	0.15571
									41.25	0.20218	--	41.25	0.15555
									41	0.20206	--	41	0.15539
									40.75	0.20194	--	40.75	0.15522
									40.5	0.20181	--	40.5	0.15505
									40.25	0.20167	--	40.25	0.15488
									40	0.20153	--	40	0.1547
									39.75	0.20139	--	39.75	0.15451
									39.5	0.20124	--	39.5	0.15433
									39.25	0.20108	--	39.25	0.15414
									39	0.20092	--	39	0.15394
									38.75	0.20076	--	38.75	0.15374
									38.5	0.20059	--	38.5	0.15354
									38.25	0.20042	--	38.25	0.15333
									38	0.20024	--	38	0.15312
									37.5	0.19988	--	37.5	0.1527
									37	0.19949	--	37	0.15225
									36.5	0.19909	--	36.5	0.1518
									36	0.19868	--	36	0.15132
									35.5	0.19824	--	35.5	0.15084
									35	0.19778	--	35	0.15033
									34.5	0.19731	--	34.5	0.14982
									34.25	0.17668	--	34.25	0.12131
									34	0.17639	--	34	0.12099
									33.75	0.1761	--	33.75	0.12067
									33.5	0.17581	--	33.5	0.12034
									33.25	0.17551	--	33.25	0.12001
									33	0.17521	--	33	0.11968
									32.75	0.1749	--	32.75	0.11934
									32.5	0.17459	--	32.5	0.119
									32.25	0.17428	--	32.25	0.11866
									32	0.17396	--	32	0.11831
									31.75	0.17364	--	31.75	0.11796
									31.5	0.17331	--	31.5	0.1176
									31.25	0.17298	--	31.25	0.11725
									31	0.17264	--	31	0.11689
									30.75	0.1723	--	30.75	0.11652
									30.5	0.17195	--	30.5	0.11615
									30.25	0.1716	--	30.25	0.11578
									30	0.17125	--	30	0.1154
									29.75	0.17089	--	29.75	0.11503
									29.5	0.17053	--	29.5	0.11464
									29.25	0.17016	--	29.25	0.11426
									29	0.16979	--	29	0.11387
									28.75	0.16941	--	28.75	0.11347
									28.5	0.16903	--	28.5	0.11308
									28.25	0.16865	--	28.25	0.11268
									28	0.16826	--	28	0.11227
									27.75	0.16787	--	27.75	0.11187
									27.5	0.16747	--	27.5	0.11146
									27.25	0.16707	--	27.25	0.11104
									27	0.16666	--	27	0.11063
									26.75	0.16625	--	26.75	0.11021
									26.5	0.16584	--	26.5	0.10978
									26.25	0.16542	--	26.25	0.10935
									26	0.165	--	26	0.10892
									25.75	0.16457	--	25.75	0.10849
									25.5	0.16414	--	25.5	0.10805
									25.25	0.1637	--	25.25	0.10761
									25	0.16326	--	25	0.10716
									24.75	0.16282	--	24.75	0.10671
									24.5	0.16237	--	24.5	0.10626
									24.25	0.16191	--	24.25	0.1058
									24	0.16146	--	24	0.10535
									23.75	0.16099	--	23.75	0.10488
									23.5	0.16053	--	23.5	0.10442
									23.25	0.16006	--	23.25	0.10395
									23	0.15958	--	23	0.10347
									22.75	0.1591	--	22.75	0.103
									22.5	0.15862	--	22.5	0.10252
									22.25	0.15813	--	22.25	0.10203
									22	0.15764	--	22	0.10154
									21.75	0.15714	--	21.75	0.10105
									21.5	0.15664	--	21.5	0.10056
									21.25	0.15614	--	21.25	0.10006
									21	0.15563	--	21	0.09956
									20.75	0.15511	--	20.75	0.09906
									20.5	0.15459	--	20.5	0.09855
									20.25	0.15407	--	20.25	0.09804
									20	0.15354	--	20	0.09752
									19.75	0.15301	--	19.75	0.097
									19.5	0.15248	--	19.5	0.09648
									19.25	0.15194	--	19.25	0.09595
									19	0.15139	--	19	0.09542
									18.75	0.15084	--	18.75	0.09489
									18.5	0.15029	--	18.5	0.09435
									18.25	0.14973	--	18.25	0.09381
									18	0.14917	--	18	0.09327
									17.75	0.14861	--	17.75	0.09272
									17.5	0.14804	--	17.5	0.09217
									17.25	0.14746	--	17.25	0.09162
									17	0.14688	--	17	0.09106
									16.75	0.1463	--	16.75	0.0905
									16.5	0.14571	--	16.5	0.08994
									16.25	0.14512	--	16.25	0.08937
									16	0.14452	--	16	0.0888
									15.75	0.14392	--	15.75	0.08822
									15.5	0.14332	--	15.5	0.08764
									15.25	0.14271	--	15.25	0.08706
									15	0.14209	--	15	0.08648
									14.75	0.14148	--	14.75	0.08589
									14.5	0.14085	--	14.5	0.0853
									14.25	0.14023	--	14.25	0.0847
									14	0.1396	--	14	0.0841
									13.75	0.13896	--	13.75	0.0835
									13.5	0.13832	--	13.5	0.08289
									13.25	0.13768	--	13.25	0.08228
									13	0.13703	--	13	0.08167
									12.75	0.13637	--	12.75	0.08105
									12.5	0.13572	--	12.5	0.08043
									12.25	0.13506	--	12.25	0.07981
									12	0.13439	--	12	0.07918
									11.75	0.13372	--	11.75	0.07855
									11.5	0.13305	--	11.5	0.07791
									11.25	0.13237	--	11.25	0.07728
									11	0.13168	--	11	0.07663
									10.75	0.131	--	10.75	0.07599
									10.5	0.1303	--	10.5	0.07534
									10.25	0.12961	--	10.25	0.07469
									10	0.12891	--	10	0.07403
									9.75	0.1282	--	9.75	0.07337
									9.5	0.12749	--	9.5	0.07271
									9.25	0.12678	--	9.25	0.07204
									9	0.12606	--	9	0.07138
									8.75	0.12534	--	8.75	0.0707
									8.5	0.12461	--	8.5	0.07003
									8.25	0.12388	--	8.25	0.06935
									8	0.12315	--	8	0.06866
									7.75	0.12241	--	7.75	0.06797
									7.5	0.12166	--	7.5	0.06728
									7.25	0.12092	--	7.25	0.06659
									7	0.12016	--	7	0.06589
									6.75	0.11941	--	6.75	0.06519
									6.5	0.11865	--	6.5	0.06449
									6.25	0.11788	--	6.25	0.06378
									6	0.11711	--	6	0.06307
									5.75	0.11634	--	5.75	0.06235
									5.5	0.11556	--	5.5	0.06163
									5.25	0.11477	--	5.25	0.06091
									5	0.11399	--	5	0.06018
									4.75	0.11319	--	4.75	0.05945
									4.5	0.1124	--	4.5	0.05872
									4.25	0.1116	--	4.25	0.05799
									4	0.11079	--	4	0.05725
									3.75	0.10998	--	3.75	0.0565
									3.5	0.10917	--	3.5	0.05576
									3.25	0.10835	--	3.25	0.05501
									3	0.10753	--	3	0.05425
									2.75	0.10671	--	2.75	0.05349
									2.5	0.10587	--	2.5	0.05273
									2.25	0.10504	--	2.25	0.05197
									2	0.1042	--	2	0.0512
									1.75	0.10336	--	1.75	0.05043
									1.5	0.10251	--	1.5	0.04965
									1.25	0.10166	--	1.25	0.04888
									1	0.1008	--	1	0.04809
									0.75	0.09994	--	0.75	0.04731
									0.5	0.09907	--	0.5	0.04652
